# Supplementary material for: Modeling corticotroph deficiency with pituitary organoids supports the functional role of NFKB2 in human pituitary differentiation
Source: eLife journal article supplement (doi:10.7554/elife.90875), 2023-11-07
Supplement: fig1-figsupp2-data1 [file elife-90875-fig1-figsupp2-data1-v1.zip]

2\_29\_2020\_2\_51\_40 PM.TIF

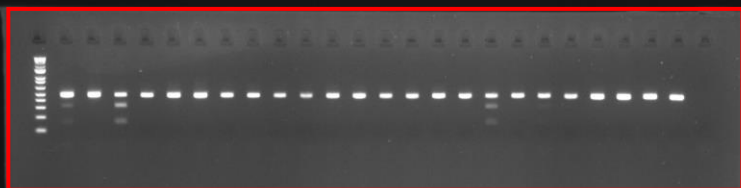

Figure 1-Figure supplement 2A  
Upper picture

2\_29\_2020\_3\_21\_53 PM.TIF

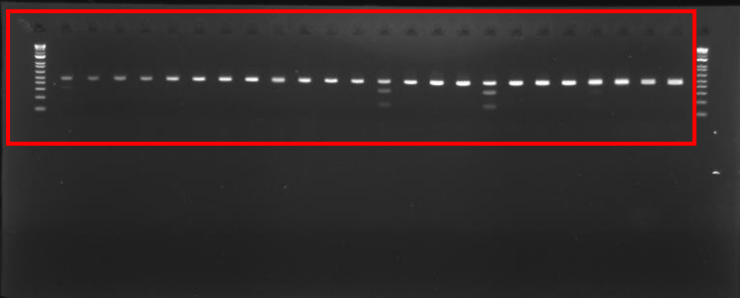

Figure 1-Figure supplement 2A  
Middle picture

7\_3\_2020-3-47 PM.TIF

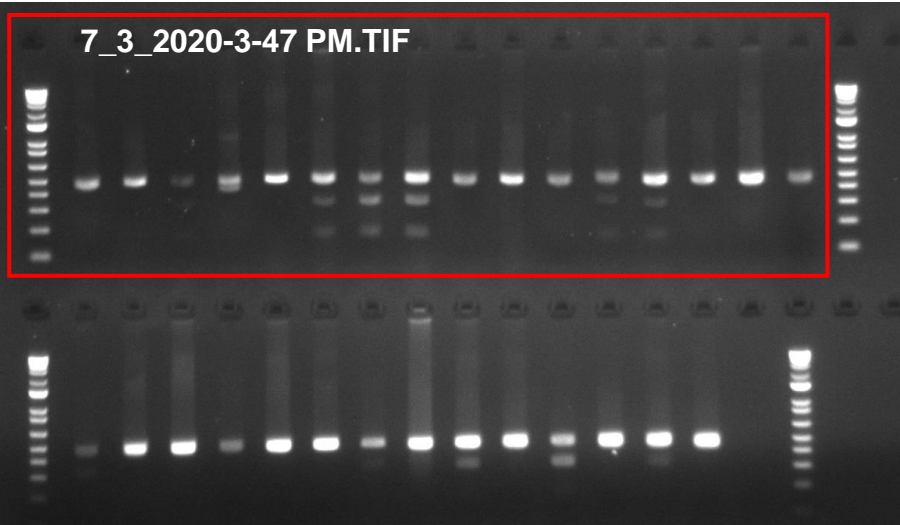

Figure 1-Figure supplement 2A  
Lower picture

**Figure 1-Figure supplement 2 source data 1:** Original pictures of gels corresponding to Figure 1-Figure supplement 2A. Pictures were cropped (red frame) and the LUT was inverted
