# Supplementary material for: Modeling corticotroph deficiency with pituitary organoids supports the functional role of NFKB2 in human pituitary differentiation
Source: eLife journal article supplement (doi:10.7554/elife.90875), 2023-11-07
Supplement: fig5-figsupp1-data1 [file elife-90875-fig5-figsupp1-data1-v1.zip]

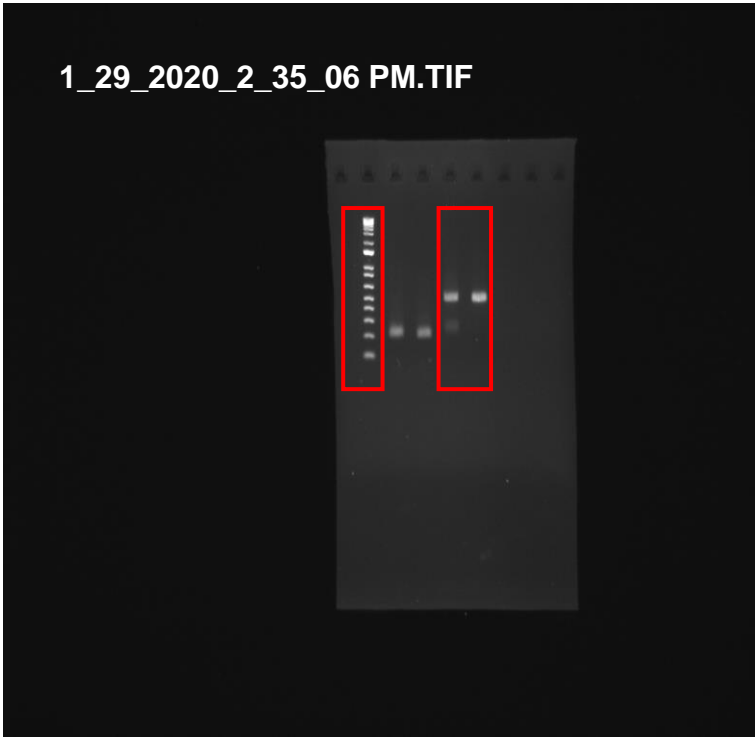

Figure 5-Figure supplement 1A

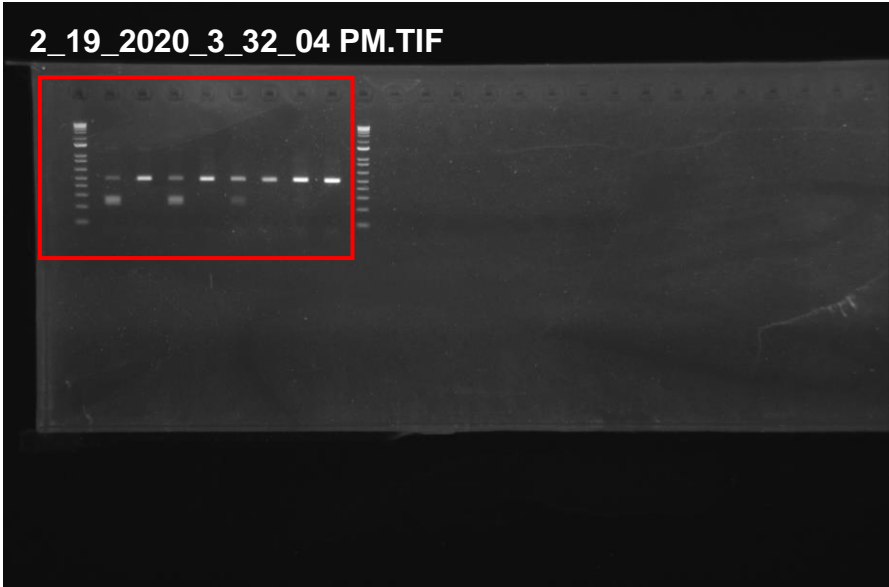

Figure 5-Figure supplement 1B

**Figure 5-Figure supplement 1 source data 1:** Original pictures of gels corresponding to Figure 5-Figure supplement 1. Pictures were cropped (red frame) and the LUT was inverted
