# Supplementary material for: Modeling corticotroph deficiency with pituitary organoids supports the functional role of NFKB2 in human pituitary differentiation
Source: eLife. 2024 Nov 28;12:RP90875. doi: 10.7554/eLife.90875 (PMC11604219; doi:10.7554/eLife.90875)
Supplement: Figure 9—source data 1. [file elife-90875-fig9-data1.xlsx]

## Sheet: Figure 9-Data source 1
Figure 9-Data source 1: differentially expressed genes expressed as a ratio between NFKB2 KI and WT organoids (n=5). The table was generated by using the R package DESeq2 (version 1.34.0)

## Sheet: Results_mRNA
geneID	gene_name	FoldChange	padj	pvalue	baseMean	log2FoldChange	lfcSE	stat
ENSG00000248167.7	TRIM39-RPP21	1.0234e-07	7.00478e-12	1.70756e-14	39.9695	-23.2201	3.02703	-7.67093
ENSG00000228170.1	AL031963.1	4.07658e-07	NA	NA	9.11781	-21.2261	3.02985	-7.00567
ENSG00000267303.1	AC011511.4	0.00358856	0.0402114	0.0072898	41.3832	-8.12238	3.027	-2.68331
ENSG00000271271.5	UGT2A2	0.0114583	4.611e-05	1.67824e-06	10.0885	-6.44746	1.34638	-4.78875
ENSG00000235300.4	AC090627.1	0.0119066	4.7014e-08	5.14045e-10	9.89222	-6.39209	1.02854	-6.21476
ENSG00000285505.1	AC010616.1	0.0133554	0.000394158	2.23935e-05	8.64931	-6.22643	1.46864	-4.23958
ENSG00000173976.16	RAX2	0.0158591	0.000326982	1.77384e-05	7.31865	-5.97855	1.39308	-4.29161
ENSG00000281039.1	AC005154.5	0.0161694	0.16617	0.0496098	7.11717	-5.95059	3.03089	-1.96331
ENSG00000234336.7	JAZF1-AS1	0.0169313	3.52364e-06	7.80645e-08	6.79926	-5.88416	1.09543	-5.37155
ENSG00000156253.7	RWDD2B	0.0175421	8.62777e-58	3.09295e-62	196.909	-5.83303	0.35036	-16.6487
ENSG00000273003.1	ARL2-SNX15	0.0178295	0.177814	0.0545619	15.3064	-5.80959	3.02213	-1.92235
ENSG00000272442.2	AL353588.1	0.0178434	0.127439	0.034095	6.46181	-5.80846	2.7412	-2.11895
ENSG00000284292.1	AC004922.1	0.0179933	0.00343412	0.000320871	121.567	-5.7964	1.61108	-3.59784
ENSG00000225539.7	LINC01821	0.0189924	1.10107e-05	3.07487e-07	13.6174	-5.71844	1.11714	-5.1188
ENSG00000285565.1	AL671762.1	0.0202799	0.197929	0.0636295	5.67158	-5.6238	3.03208	-1.85477
ENSG00000270181.3	BIVM-ERCC5	0.0206272	0.0173023	0.00244695	730.487	-5.59931	1.84806	-3.02983
ENSG00000272647.3	AC005020.2	0.0232758	0.0206426	0.00309694	4.9451	-5.42503	1.83405	-2.95795
ENSG00000128652.11	HOXD3	0.0245067	0.000132536	6.01428e-06	10.767	-5.35068	1.18224	-4.52589
ENSG00000238169.2	LINC01053	0.0252381	4.56173e-05	1.65495e-06	4.66124	-5.30825	1.10784	-4.79155
ENSG00000233041.8	PHGR1	0.0258211	NA	NA	4.49705	-5.27531	3.03369	-1.73891
ENSG00000236762.1	RPL19P16	0.0278858	0.00550718	0.0005751	4.19195	-5.16432	1.49991	-3.44309
ENSG00000280171.1	AC010329.5	0.0294228	0.00403123	0.000389611	3.86636	-5.08692	1.43414	-3.54702
ENSG00000170935.8	NCBP2L	0.0296994	0.000344766	1.90706e-05	3.99273	-5.07342	1.18663	-4.2755
ENSG00000285314.1	AC002470.2	0.0304967	0.167165	0.0500266	3.79374	-5.0352	2.56933	-1.95974
ENSG00000260272.1	AC093525.2	0.0322306	0.141243	0.0394135	3.55012	-4.95542	2.40573	-2.05984
ENSG00000269119.1	HNRNPA1P52	0.0326145	NA	NA	104.768	-4.93834	1.53224	-3.22295
ENSG00000264269.1	AC016866.1	0.0327774	0.00839921	0.000978277	3.55773	-4.93116	1.49579	-3.2967
ENSG00000214216.10	IQCJ	0.0333679	0.00121758	8.95987e-05	3.52708	-4.90539	1.25228	-3.91716
ENSG00000255085.8	AF186192.2	0.0335444	3.89459e-09	3.01571e-11	25.0013	-4.89778	0.736974	-6.6458
ENSG00000178473.7	UCN3	0.0338813	1.26042e-06	2.2622e-08	31.1571	-4.88337	0.873488	-5.59065
ENSG00000261011.1	AL136982.4	0.034163	0.0113786	0.0014338	3.43751	-4.87142	1.52816	-3.18776
ENSG00000251076.1	AC104126.1	0.0342481	2.24906e-05	7.13539e-07	19.0956	-4.86783	0.981885	-4.95764
ENSG00000284700.1	AL049637.1	0.0346964	0.000631896	3.9393e-05	45.2244	-4.84907	1.17953	-4.11101
ENSG00000147378.11	FATE1	0.0351904	0.0104436	0.00128678	3.29753	-4.82867	1.50009	-3.21891
ENSG00000125255.7	SLC10A2	0.0359073	0.169673	0.0510691	3.2209	-4.79958	2.46019	-1.9509
ENSG00000251015.1	SLC25A30-AS1	0.0361874	0.00991724	0.00120521	3.20889	-4.78837	1.47897	-3.23764
ENSG00000260092.1	AC009163.3	0.0364261	0.0711458	0.0156472	3.15991	-4.77888	1.97716	-2.41704
ENSG00000159650.9	UROC1	0.0365347	0.001136	8.18151e-05	3.2549	-4.77459	1.21213	-3.93902
ENSG00000287856.1	AL445524.2	0.0366929	NA	NA	64.2553	-4.76836	2.90629	-1.6407
ENSG00000073598.6	FNDC8	0.0384459	NA	0.00489088	3.01395	-4.70103	1.67051	-2.81413
ENSG00000253496.3	AC011586.2	0.0392042	NA	0.067938	2.94013	-4.67285	2.55988	-1.82542
ENSG00000064835.11	POU1F1	0.0394586	0.000715204	4.63812e-05	6.97035	-4.66352	1.14494	-4.07315
ENSG00000257529.5	RPL36A-HNRNPH2	0.0399652	0.000116022	5.09507e-06	563.914	-4.64511	1.01848	-4.56083
ENSG00000115592.11	PRKAG3	0.0401008	NA	0.00447569	2.94272	-4.64022	1.63243	-2.84253
ENSG00000259342.1	AC025580.1	0.0403141	NA	0.000110747	2.89666	-4.63257	1.19836	-3.86575
ENSG00000255082.1	GRM5-AS1	0.0407228	0.216621	0.0728454	9.98977	-4.61802	2.57444	-1.7938
ENSG00000286425.1	AL773573.1	0.0409399	NA	0.0018118	2.81137	-4.61035	1.47793	-3.11946
ENSG00000224511.2	LINC00365	0.0411713	NA	0.00230611	2.78727	-4.60222	1.51007	-3.04769
ENSG00000258732.1	AC025884.1	0.0423611	NA	0.0812038	2.71338	-4.56112	2.6157	-1.74374
ENSG00000283515.1	AC020915.5	0.0425048	NA	NA	23.6549	-4.55623	1.67977	-2.71241
ENSG00000258294.5	AC090503.2	0.0425164	NA	0.0250588	2.74633	-4.55584	2.03341	-2.2405
ENSG00000285779.1	AL358472.7	0.0425175	NA	NA	287.035	-4.5558	2.88946	-1.57669
ENSG00000115934.11	AC087235.1	0.0431395	NA	0.00276511	2.76603	-4.53485	1.5153	-2.99271
ENSG00000187870.7	RNFT1P3	0.0437873	NA	0.0197895	2.62785	-4.51334	1.9368	-2.33031
ENSG00000286691.1	AL590009.1	0.0442311	NA	0.00203007	2.56167	-4.49879	1.4579	-3.0858
ENSG00000269516.6	CYP4F23P	0.0445737	2.26649e-05	7.20693e-07	13.4847	-4.48766	0.905555	-4.9557
ENSG00000285417.1	BX571818.1	0.0446392	NA	0.00311224	2.55578	-4.48555	1.51722	-2.95643
ENSG00000259280.1	AC018563.2	0.0450684	NA	0.0264473	2.5623	-4.47174	2.01468	-2.21958
ENSG00000183862.5	CNGA2	0.0455104	NA	0.021916	2.51806	-4.45766	1.94503	-2.29182
ENSG00000231768.2	LINC01354	0.0456295	NA	0.000368413	2.54399	-4.45389	1.25048	-3.56173
ENSG00000184571.13	PIWIL3	0.0457017	NA	0.0741302	2.47781	-4.45161	2.49277	-1.78581
ENSG00000146469.13	VIP	0.0458029	NA	0.023591	2.50677	-4.44842	1.96509	-2.26372
ENSG00000182352.8	C17orf77	0.0460454	NA	0.00932139	2.54411	-4.4408	1.70798	-2.60004
ENSG00000263958.2	AC091138.1	0.0464239	NA	0.0034303	2.42844	-4.42899	1.51352	-2.92629
ENSG00000287024.1	AL022162.1	0.0470229	NA	0.00638154	2.51572	-4.41049	1.61704	-2.7275
ENSG00000150045.12	KLRF1	0.0473331	3.04829e-05	1.03049e-06	12.6908	-4.40101	0.900789	-4.88573
ENSG00000259042.3	AC244502.3	0.0475418	NA	0.0887983	2.43235	-4.39466	2.5824	-1.70177
ENSG00000173366.11	AC097637.1	0.047793	NA	NA	2.37387	-4.38706	3.04002	-1.4431
ENSG00000196620.10	UGT2B15	0.0484891	NA	0.150961	2.40913	-4.36619	3.04022	-1.43615
ENSG00000259104.2	PTCSC3	0.0486848	NA	0.0245566	2.33185	-4.36039	1.93941	-2.24831
ENSG00000125492.10	BARHL1	0.0487239	NA	0.0859896	2.34362	-4.35923	2.53895	-1.71694
ENSG00000278249.1	SCARNA2	0.0487595	NA	0.0136047	2.28999	-4.35817	1.76621	-2.46753
ENSG00000229108.2	LINC02587	0.0488939	NA	0.0322253	2.38858	-4.3542	2.03315	-2.1416
ENSG00000229941.6	PDE11A-AS1	0.0489947	NA	0.00536532	2.35566	-4.35123	1.56281	-2.78424
ENSG00000196091.15	MYBPC1	0.0498821	NA	0.0892939	2.28185	-4.32533	2.54561	-1.69913
ENSG00000280560.2	LINC01374	0.0500247	0.000685376	4.41453e-05	10.0741	-4.32122	1.05792	-4.08464
ENSG00000237027.1	AL159174.1	0.0505649	NA	0.00425755	2.26092	-4.30572	1.50633	-2.85842
ENSG00000267228.7	AC012254.2	0.050712	NA	NA	5.63608	-4.30153	3.02626	-1.4214
ENSG00000234527.1	PCDH9-AS1	0.0520451	NA	0.0493636	2.23885	-4.26409	2.16954	-1.96544
ENSG00000287687.2	AC007387.2	0.0520935	NA	0.00835465	2.25097	-4.26275	1.61628	-2.63739
ENSG00000283706.2	PRSS50	0.0521287	NA	0.109014	2.2139	-4.26178	2.65922	-1.60264
ENSG00000249647.2	C5orf66-AS2	0.0532029	NA	0.00272139	2.25335	-4.23235	1.41193	-2.99757
ENSG00000228659.1	LINC01201	0.0536088	NA	0.00650446	2.17682	-4.22139	1.55129	-2.7212
ENSG00000225805.4	DEFB131B	0.0539118	NA	0.0350412	2.1335	-4.21326	1.99881	-2.10788
ENSG00000248871.1	TNFSF12-TNFSF13	0.0540383	NA	0.166358	2.14461	-4.20987	3.04181	-1.384
ENSG00000250796.1	AC112484.2	0.0542725	NA	0.00659512	2.1277	-4.20363	1.54737	-2.71663
ENSG00000175325.2	PROP1	0.0543463	0.000712172	4.61335e-05	84.6878	-4.20167	1.03124	-4.0744
ENSG00000178645.13	C10orf53	0.0544365	NA	0.00835445	2.09842	-4.19928	1.59221	-2.6374
ENSG00000137875.4	BCL2L10	0.0545525	NA	0.0140133	2.18328	-4.19621	1.70791	-2.45692
ENSG00000263316.1	AC027763.2	0.0549638	0.00401821	0.00038817	4.95963	-4.18537	1.17964	-3.548
ENSG00000229855.9	AC008568.1	0.0583167	NA	0.124359	1.985	-4.09995	2.66796	-1.53673
ENSG00000223436.1	AC011625.1	0.0585032	NA	0.0168947	2.01841	-4.09534	1.71426	-2.38899
ENSG00000249590.7	AC004832.3	0.0587182	NA	0.115912	1.94016	-4.09005	2.60154	-1.57217
ENSG00000255439.6	AC135050.2	0.0592764	NA	NA	9.20823	-4.0764	2.97783	-1.36891
ENSG00000251370.1	SEMA5A-AS1	0.0594776	NA	0.00992024	1.9667	-4.07151	1.57896	-2.5786
ENSG00000186891.14	TNFRSF18	0.059609	NA	0.0158623	1.96571	-4.06833	1.68665	-2.41207
ENSG00000288602.1	C8orf44-SGK3	0.060104	0.0795474	0.0181281	36.2855	-4.0564	1.71664	-2.36299
ENSG00000258413.2	AL158801.2	0.0608661	NA	0.0111618	1.84219	-4.03822	1.59136	-2.53759
ENSG00000224853.3	LINC00393	0.062003	NA	0.0559735	1.84414	-4.01152	2.09891	-1.91124
ENSG00000088926.14	F11	0.0621827	NA	0.0134814	1.86381	-4.00734	1.62189	-2.47079
ENSG00000232111.2	AC073488.1	0.0623764	NA	0.0109209	1.8471	-4.00286	1.57269	-2.54522
ENSG00000241956.10	AC109466.1	0.0633342	0.000735517	4.79358e-05	16.1818	-3.98087	0.979191	-4.06547
ENSG00000115263.15	GCG	0.063449	NA	NA	5.32997	-3.97826	3.01803	-1.31817
ENSG00000257682.1	AC090503.1	0.0637258	NA	0.0554038	1.83492	-3.97198	2.07339	-1.9157
ENSG00000268884.1	AC010323.2	0.0638913	NA	0.0509643	1.79407	-3.96824	2.03314	-1.95178
ENSG00000107187.17	LHX3	0.0639601	2.39217e-06	4.93099e-08	1730	-3.96668	0.727327	-5.45378
ENSG00000160180.15	TFF3	0.064253	0.00160048	0.000124906	9.1379	-3.96009	1.03227	-3.83629
ENSG00000016490.16	CLCA1	0.0648367	NA	NA	10.7903	-3.94705	2.95877	-1.33402
ENSG00000145194.18	ECE2	0.0648632	NA	0.0788905	1.71751	-3.94646	2.24593	-1.75716
ENSG00000251173.1	UCHL1-AS1	0.0651613	NA	0.0521235	1.75617	-3.93984	2.02864	-1.94211
ENSG00000253117.5	OC90	0.0653223	NA	0.139615	1.77168	-3.93628	2.66464	-1.47723
ENSG00000197826.11	CFAP299	0.0658939	0.00285905	0.000257361	6.50005	-3.92371	1.07357	-3.65482
ENSG00000286056.1	AC008055.2	0.0664697	NA	0.0763724	1.7632	-3.91116	2.20703	-1.77213
ENSG00000165192.14	ASB11	0.0668344	NA	0.0772139	1.76812	-3.90326	2.20887	-1.76709
ENSG00000187908.19	DMBT1	0.0675696	NA	NA	32.41	-3.88748	2.3537	-1.65165
ENSG00000260057.6	LINC01571	0.0691763	NA	0.0709779	1.68676	-3.85358	2.13421	-1.80562
ENSG00000249849.1	AC138819.1	0.0697563	NA	0.0613709	1.63917	-3.84153	2.0534	-1.87081
ENSG00000248144.6	ADH1C	0.0700728	NA	0.0285783	1.6913	-3.835	1.75174	-2.18925
ENSG00000231156.1	AC093702.1	0.0705184	0.0481116	0.00921043	3.84838	-3.82586	1.46914	-2.60414
ENSG00000171658.8	NMRAL2P	0.0707942	0.005289	0.000547007	3.98352	-3.82022	1.10519	-3.45661
ENSG00000255340.1	AC087276.4	0.0711277	NA	0.0826478	1.65508	-3.81345	2.19729	-1.73553
ENSG00000285942.1	AC018362.3	0.0711379	NA	NA	1.58258	-3.81324	3.0467	-1.25159
ENSG00000263033.2	AC007220.1	0.0713979	NA	0.0651807	1.60321	-3.80797	2.06504	-1.84402
ENSG00000286869.1	AC022276.1	0.0714464	NA	0.0200356	1.63525	-3.807	1.63694	-2.32568
ENSG00000179577.3	AP003471.1	0.072124	NA	0.0209699	1.60228	-3.79338	1.6432	-2.30853
ENSG00000253693.1	AC008415.1	0.0728723	NA	0.00440816	2.62465	-3.77849	1.32701	-2.84737
ENSG00000287969.1	AL355474.1	0.0728802	NA	0.0646713	1.55882	-3.77833	2.04508	-1.84752
ENSG00000278607.1	AC015819.2	0.0739265	NA	0.0328489	1.57086	-3.75776	1.76096	-2.13393
ENSG00000286418.1	AC018716.2	0.074675	NA	0.0779598	1.53842	-3.74323	2.12364	-1.76265
ENSG00000231193.1	AL157884.2	0.0747606	NA	0.0806598	1.55111	-3.74158	2.14188	-1.74687
ENSG00000125780.12	TGM3	0.0749672	NA	0.220075	1.54889	-3.7376	3.0478	-1.22633
ENSG00000111713.3	GYS2	0.0749885	NA	0.167365	1.4974	-3.73719	2.70669	-1.38072
ENSG00000248757.2	LINC02115	0.0750052	NA	0.081552	1.53775	-3.73687	2.14546	-1.74175
ENSG00000240423.3	LINC00636	0.0751094	NA	0.0804136	1.53554	-3.73486	2.13629	-1.74829
ENSG00000279712.1	FP325330.3	0.0752115	0.0574192	0.0116691	3.63452	-3.7329	1.48014	-2.522
ENSG00000187664.9	HAPLN4	0.0755307	NA	NA	18.8073	-3.72679	1.77743	-2.09673
ENSG00000251177.2	AC093829.1	0.0755725	NA	0.186713	1.53119	-3.726	2.82194	-1.32037
ENSG00000100191.5	SLC5A4	0.075769	NA	0.169398	1.50855	-3.72225	2.70878	-1.37414
ENSG00000286562.1	Z98742.4	0.0763097	NA	0.024567	1.49936	-3.71199	1.65113	-2.24814
ENSG00000231133.8	HAR1B	0.0766412	NA	0.0284601	1.52411	-3.70574	1.69143	-2.19089
ENSG00000285454.1	AC111006.1	0.0773652	NA	0.0736832	1.46696	-3.69217	2.06431	-1.78858
ENSG00000251441.3	RTEL1P1	0.0774321	NA	0.0322087	1.53284	-3.69092	1.72327	-2.14181
ENSG00000156920.11	ADGRG4	0.0775643	NA	0.171889	1.46183	-3.68846	2.69988	-1.36616
ENSG00000102104.9	RS1	0.0787394	NA	0.178588	1.44811	-3.66677	2.72599	-1.34511
ENSG00000253796.2	AC104248.1	0.0787619	NA	0.0447596	1.48419	-3.66636	1.82687	-2.00691
ENSG00000278139.1	P3R3URF-PIK3R3	0.0788162	NA	0.229288	1.45313	-3.66536	3.04889	-1.20219
ENSG00000181282.4	OR5AK3P	0.0790426	NA	0.00740454	1.48504	-3.66123	1.36711	-2.67808
ENSG00000235832.2	CNN2P3	0.0790426	NA	0.00740454	1.48504	-3.66123	1.36711	-2.67808
ENSG00000248210.2	LINC02355	0.0792404	NA	0.0809382	1.44136	-3.65762	2.09574	-1.74527
ENSG00000170788.14	DYDC1	0.0803115	NA	0.0798676	1.40653	-3.63825	2.07727	-1.75145
ENSG00000183439.9	TRIM61	0.0804603	6.89259e-05	2.69823e-06	26.4827	-3.63558	0.774756	-4.69255
ENSG00000249138.1	AC084871.1	0.0806817	NA	0.103465	1.46489	-3.63161	2.23034	-1.62828
ENSG00000267108.1	AP001029.1	0.0807801	NA	0.0882378	1.42143	-3.62986	2.12924	-1.70477
ENSG00000176571.12	CNBD1	0.0812618	NA	0.235045	1.42974	-3.62128	3.04959	-1.18746
ENSG00000226403.2	AL392089.1	0.0815648	0.00136763	0.000103175	9.59962	-3.61591	0.931215	-3.883
ENSG00000280224.1	AL008636.1	0.0816318	NA	0.211065	1.42089	-3.61472	2.8903	-1.25064
ENSG00000257859.2	CASC18	0.0816825	0.00237078	0.00020236	8.74059	-3.61383	0.972492	-3.71605
ENSG00000274682.1	AC015540.1	0.0817171	NA	0.0111902	2.23797	-3.61322	1.42438	-2.5367
ENSG00000234699.1	AL139339.1	0.0829075	NA	0.192874	1.38477	-3.59235	2.75884	-1.30212
ENSG00000138152.10	BTBD16	0.0835753	NA	0.0969169	1.37612	-3.58078	2.15711	-1.65999
ENSG00000272162.1	AL024498.2	0.0841102	0.024551	0.00388309	8.29841	-3.57158	1.23691	-2.88751
ENSG00000171431.4	KRT20	0.0841565	NA	NA	6.0289	-3.57078	2.98941	-1.19448
ENSG00000214866.9	DCDC2C	0.0843142	4.67346e-06	1.07727e-07	28.9867	-3.56808	0.671552	-5.31318
ENSG00000226676.1	LINC02679	0.0846082	NA	0.0180373	2.25799	-3.56306	1.50667	-2.36485
ENSG00000165623.10	UCMA	0.0847552	NA	0.103462	1.36963	-3.56056	2.18668	-1.6283
ENSG00000287048.1	AC096589.2	0.0853736	0.0144976	0.00195519	5.56568	-3.55007	1.14631	-3.09696
ENSG00000260702.3	AL031713.1	0.085625	NA	0.100527	1.35764	-3.54582	2.15905	-1.6423
ENSG00000160202.7	CRYAA	0.0860103	0.0470857	0.00896646	9.76369	-3.53935	1.35434	-2.61333
ENSG00000272428.1	AL450270.1	0.0861096	0.0144377	0.00194239	3.17906	-3.53768	1.14159	-3.0989
ENSG00000248719.2	AC021127.1	0.0862594	NA	0.0523394	1.38196	-3.53517	1.82194	-1.94033
ENSG00000267052.3	AC005050.1	0.0862928	NA	0.101402	1.30882	-3.53462	2.15776	-1.63809
ENSG00000230795.3	HLA-K	0.0868704	NA	0.0377466	1.33176	-3.52499	1.69667	-2.0776
ENSG00000264736.1	BDP1P	0.0870434	NA	0.0534666	1.3735	-3.52212	1.82386	-1.93113
ENSG00000237734.1	AL163192.1	0.0877267	NA	0.112357	1.34402	-3.51084	2.21129	-1.58769
ENSG00000248479.1	AC104137.1	0.0878027	9.67593e-06	2.63274e-07	34.4765	-3.50959	0.681738	-5.148
ENSG00000285639.1	AL133259.1	0.0879923	NA	0.117625	1.32621	-3.50648	2.24082	-1.56482
ENSG00000232386.9	AC015712.1	0.0880319	NA	0.110523	1.33482	-3.50583	2.19685	-1.59585
ENSG00000286530.1	AC108057.1	0.0887015	NA	0.0997339	1.28385	-3.4949	2.12308	-1.64614
ENSG00000173250.2	GPR151	0.0888059	0.000189912	9.40198e-06	14.0082	-3.4932	0.788446	-4.43049
ENSG00000266527.1	AC005697.2	0.0895367	NA	0.219841	1.27309	-3.48138	2.83742	-1.22695
ENSG00000229246.2	LINC00377	0.0900965	NA	0.138039	1.2905	-3.47238	2.34125	-1.48313
ENSG00000273249.1	BX649632.1	0.0910361	NA	0.10979	1.27207	-3.45742	2.16205	-1.59914
ENSG00000231394.1	AC099681.2	0.0911557	NA	0.116071	1.25377	-3.45552	2.19889	-1.57148
ENSG00000288052.1	AL356952.1	0.0919414	NA	0.25935	1.28487	-3.44314	3.05262	-1.12793
ENSG00000236849.6	LINC01474	0.0920411	NA	0.239684	1.25908	-3.44158	2.92707	-1.17578
ENSG00000284989.1	AL451062.4	0.0922644	NA	0.260065	1.25823	-3.43808	3.05272	-1.12624
ENSG00000241313.3	WWTR1-AS1	0.0923058	2.62289e-05	8.6317e-07	18.921	-3.43743	0.698592	-4.92051
ENSG00000116745.7	RPE65	0.0925552	4.2057e-08	4.50511e-10	34.0473	-3.43354	0.55065	-6.23544
ENSG00000224159.1	HMGB1P9	0.0928643	NA	0.143179	1.25668	-3.42873	2.34194	-1.46405
ENSG00000287225.1	Z84468.2	0.0932912	NA	0.224455	1.22966	-3.42212	2.8171	-1.21477
ENSG00000154646.9	TMPRSS15	0.0935191	0.00292545	0.000264176	7.73539	-3.41859	0.937086	-3.64811
ENSG00000288581.1	AL137139.3	0.0935951	NA	0.0559864	1.24047	-3.41742	1.78816	-1.91114
ENSG00000246223.9	LINC01550	0.0936592	0.0704419	0.0154062	8.34143	-3.41643	1.41018	-2.42269
ENSG00000219404.2	AL359694.1	0.093908	NA	0.228387	1.23466	-3.41261	2.83316	-1.20452
ENSG00000261000.1	AC244034.2	0.0940802	NA	0.0603034	1.27135	-3.40996	1.81519	-1.87857
ENSG00000232891.1	AL450344.3	0.0943193	NA	0.121872	1.21519	-3.4063	2.20193	-1.54696
ENSG00000250237.1	AC010273.3	0.0944327	NA	0.0481133	1.22661	-3.40457	1.72264	-1.97637
ENSG00000147138.2	GPR174	0.0944462	NA	0.0271079	2.96424	-3.40436	1.54046	-2.20996
ENSG00000228141.7	AC105339.1	0.0945066	0.0485191	0.00932289	3.17382	-3.40344	1.30903	-2.59998
ENSG00000277893.2	SRD5A2	0.094648	NA	0.229673	1.19593	-3.40128	2.83157	-1.2012
ENSG00000113073.15	SLC4A9	0.0948576	NA	0.124909	1.20736	-3.39809	2.21448	-1.53449
ENSG00000261792.1	DNM1P28	0.0954359	NA	0.0240649	1.26825	-3.38932	1.5023	-2.25609
ENSG00000276076.4	CRYAA2	0.0956271	0.0538376	0.010727	8.84653	-3.38644	1.32725	-2.55147
ENSG00000215165.3	TCEA1P3	0.0956709	NA	0.126655	1.20518	-3.38578	2.21665	-1.52743
ENSG00000269437.7	NXF2B	0.0960812	NA	NA	1.85101	-3.3796	1.72716	-1.95674
ENSG00000287688.1	AC011317.1	0.0961202	NA	0.0562741	1.20821	-3.37902	1.77013	-1.90891
ENSG00000250900.6	AC008443.6	0.09631	NA	0.238289	1.21543	-3.37617	2.86292	-1.17927
ENSG00000266946.1	MRPL37P1	0.0967961	NA	0.0351788	1.23718	-3.36891	1.59945	-2.10629
ENSG00000237429.1	BX293535.1	0.0973221	NA	0.122186	1.17595	-3.36109	2.17453	-1.54566
ENSG00000250467.1	PHOX2B-AS1	0.0974155	0.0839667	0.0194633	4.70431	-3.3597	1.4379	-2.33654
ENSG00000241544.2	LINC02029	0.097662	NA	0.271848	1.19145	-3.35606	3.05425	-1.09882
ENSG00000273877.4	AC236972.3	0.098317	NA	0.12545	1.16995	-3.34642	2.18392	-1.53229
ENSG00000286915.1	AC096992.3	0.0985764	NA	0.136047	1.17915	-3.34261	2.24235	-1.49067
ENSG00000237667.7	LINC01115	0.0992153	1.18285e-06	2.0905e-08	30.2249	-3.33329	0.59477	-5.60434
ENSG00000239801.1	DENND6A-AS1	0.0993526	NA	0.0246632	2.80036	-3.3313	1.48279	-2.24664
ENSG00000235907.2	AC115285.1	0.0997491	NA	0.00504126	2.80453	-3.32555	1.18584	-2.80439
ENSG00000284391.1	AL139398.1	0.100382	NA	0.127305	1.13223	-3.31643	2.17497	-1.52482
ENSG00000269793.7	ZIM2-AS1	0.1004	NA	0.267414	1.15813	-3.31617	2.99013	-1.10904
ENSG00000160883.11	HK3	0.100554	NA	0.136977	1.14668	-3.31395	2.2284	-1.48714
ENSG00000283438.1	AC000029.2	0.100979	NA	0.00852118	2.76851	-3.30787	1.25742	-2.63069
ENSG00000205403.13	CFI	0.10118	2.58337e-05	8.47387e-07	917.016	-3.30501	0.671187	-4.92412
ENSG00000138109.11	CYP2C9	0.101381	NA	0.15367	1.14762	-3.30214	2.31455	-1.42669
ENSG00000257341.5	AL928654.3	0.101456	NA	0.264262	1.12468	-3.30107	2.95696	-1.11637
ENSG00000215148.9	PRSS41	0.10156	NA	0.280169	1.14385	-3.29959	3.05535	-1.07994
ENSG00000237169.1	RPL12P27	0.102624	NA	0.167821	1.13754	-3.28456	2.38143	-1.37924
ENSG00000223390.1	AL445685.1	0.102766	NA	0.25944	1.14349	-3.28257	2.91082	-1.12771
ENSG00000236120.7	AC110995.1	0.10285	NA	0.247919	1.09286	-3.28139	2.84	-1.15542
ENSG00000260911.2	AC135050.3	0.102951	NA	0.141957	1.10903	-3.27997	2.23349	-1.46854
ENSG00000166569.8	CPLX4	0.103021	0.0270466	0.0043961	14.3467	-3.27899	1.15123	-2.84825
ENSG00000273119.1	AP005229.2	0.10307	0.0169505	0.00238201	4.34222	-3.2783	1.07912	-3.03794
ENSG00000180116.15	C12orf40	0.10338	NA	0.256983	1.12675	-3.27397	2.88824	-1.13355
ENSG00000233080.3	LINC01399	0.103522	NA	0.174701	1.15258	-3.272	2.41075	-1.35725
ENSG00000225472.2	AL136366.1	0.103533	0.0255886	0.00407931	4.67455	-3.27183	1.13923	-2.87196
ENSG00000264529.1	AC006270.2	0.103559	NA	0.0460984	1.17949	-3.27148	1.64026	-1.99449
ENSG00000162598.13	C1orf87	0.103957	NA	0.257949	1.11002	-3.26593	2.88701	-1.13125
ENSG00000287636.1	AC005229.5	0.10425	NA	0.140898	1.0982	-3.26188	2.21526	-1.47246
ENSG00000271329.1	AL035417.2	0.104592	NA	0.147386	1.11272	-3.25715	2.24813	-1.44883
ENSG00000287903.1	AL359852.2	0.104895	NA	0.145092	1.09037	-3.25299	2.23252	-1.45709
ENSG00000109943.9	CRTAM	0.104945	NA	NA	1.06105	-3.2523	3.05631	-1.06413
ENSG00000172460.17	PRSS30P	0.105115	0.00143487	0.000109512	8.64029	-3.24996	0.840112	-3.86849
ENSG00000275064.1	AC239860.1	0.105152	NA	0.262289	1.10877	-3.24945	2.89871	-1.121
ENSG00000279444.1	AC135584.1	0.105152	NA	0.262289	1.10877	-3.24945	2.89871	-1.121
ENSG00000285532.2	LINC02788	0.105381	NA	0.264719	1.09492	-3.24631	2.91068	-1.11531
ENSG00000187862.12	TTC24	0.105721	0.0578144	0.0117784	3.55825	-3.24166	1.28703	-2.51871
ENSG00000229495.1	AL450327.1	0.106053	NA	0.280264	1.10132	-3.23714	2.99811	-1.07973
ENSG00000286944.1	AL137018.1	0.10611	NA	0.15147	1.09121	-3.23636	2.25631	-1.43436
ENSG00000254533.1	AF186192.1	0.106248	NA	0.0135351	1.67148	-3.2345	1.30985	-2.46937
ENSG00000232717.2	TRIM51JP	0.106261	NA	0.176749	1.10372	-3.23432	2.39432	-1.35083
ENSG00000263429.3	TMEM238L	0.107062	NA	0.0768725	1.10644	-3.22348	1.82207	-1.76913
ENSG00000253317.1	AC078906.1	0.107104	NA	0.26864	1.06164	-3.22291	2.9135	-1.1062
ENSG00000272729.1	AC009336.1	0.107119	NA	0.154302	1.09104	-3.22272	2.26235	-1.4245
ENSG00000257588.1	AC025154.2	0.107178	NA	0.155558	1.08275	-3.22192	2.26868	-1.42017
ENSG00000255833.2	TIFAB	0.107215	NA	0.270821	1.07693	-3.22143	2.92545	-1.10117
ENSG00000230001.1	AL359095.1	0.107327	NA	0.0828893	1.11173	-3.21992	1.85676	-1.73416
ENSG00000235584.3	AC008268.1	0.107459	NA	0.0119723	1.79692	-3.21815	1.28062	-2.51296
ENSG00000287591.1	AL360169.3	0.107963	NA	0.145419	1.04102	-3.21139	2.20577	-1.4559
ENSG00000287503.1	AC027243.4	0.108258	NA	0.161184	1.08701	-3.20745	2.28924	-1.4011
ENSG00000223534.1	HLA-DQB1-AS1	0.108671	NA	0.0408495	2.7851	-3.20196	1.56571	-2.04505
ENSG00000131885.17	KRT17P1	0.108861	NA	0.030269	2.578	-3.19944	1.47674	-2.16655
ENSG00000162723.10	SLAMF9	0.109126	NA	0.1701	1.08979	-3.19593	2.32959	-1.37188
ENSG00000232790.3	LINC01162	0.109171	NA	0.0471815	2.57926	-3.19534	1.61001	-1.98467
ENSG00000271723.5	MROH7-TTC4	0.109366	0.0540501	0.010779	135.412	-3.19277	1.25217	-2.54978
ENSG00000231324.1	AP000696.1	0.109585	NA	0.154608	1.04231	-3.18988	2.24096	-1.42344
ENSG00000255087.4	AP001993.1	0.109592	NA	0.149421	1.03776	-3.18979	2.2127	-1.44158
ENSG00000280719.1	PCAT5	0.109904	NA	0.149842	1.03428	-3.18569	2.21215	-1.44009
ENSG00000264212.1	AC103808.1	0.110149	NA	0.284739	1.07156	-3.18247	2.97502	-1.06973
ENSG00000150051.14	MKX	0.1102	2.41668e-07	3.3441e-09	174.198	-3.18181	0.538036	-5.91375
ENSG00000170891.11	CYTL1	0.110808	3.36964e-05	1.16569e-06	76.7738	-3.17386	0.652873	-4.86138
ENSG00000171509.16	RXFP1	0.111103	0.00607983	0.00065408	8.82012	-3.17003	0.930137	-3.40814
ENSG00000287500.1	AC009754.2	0.111886	NA	0.282105	1.03184	-3.15989	2.93779	-1.0756
ENSG00000288011.1	AC024597.1	0.111925	NA	0.165476	1.02538	-3.1594	2.27805	-1.38689
ENSG00000235010.1	AL512622.1	0.112057	NA	0.0869549	1.70522	-3.1577	1.84479	-1.71168
ENSG00000258785.6	LINC01580	0.112587	NA	0.168128	1.03053	-3.15089	2.28617	-1.37824
ENSG00000261527.1	AC026464.5	0.112791	NA	0.174583	1.04727	-3.14828	2.31896	-1.35762
ENSG00000254731.1	AP003059.1	0.112867	NA	0.161522	0.997923	-3.1473	2.24812	-1.39997
ENSG00000258586.1	LINC02274	0.113181	NA	0.187211	1.05382	-3.1433	2.38332	-1.31888
ENSG00000256155.1	LINC02598	0.113314	NA	0.296331	1.0251	-3.1416	3.00824	-1.04433
ENSG00000286805.1	AL138716.1	0.113557	0.0151318	0.00206127	5.40621	-3.13851	1.01858	-3.08126
ENSG00000277543.1	AC026471.5	0.113669	NA	0.168936	1.03373	-3.13709	2.28047	-1.37563
ENSG00000288544.1	Z82248.1	0.114144	NA	0.280236	0.984959	-3.13108	2.89971	-1.07979
ENSG00000206422.2	LRRC30	0.114229	NA	0.303423	1.02484	-3.13	3.04143	-1.02912
ENSG00000248749.1	AC104063.1	0.114229	NA	0.303423	1.02484	-3.13	3.04143	-1.02912
ENSG00000259134.7	LINC00924	0.114593	NA	0.306923	1.03181	-3.12541	3.05903	-1.0217
ENSG00000257002.1	AP000438.1	0.114868	NA	0.307471	0.994245	-3.12195	3.05911	-1.02054
ENSG00000242120.4	MDFIC2	0.114891	NA	0.0922074	1.0105	-3.12166	1.85386	-1.68387
ENSG00000104371.5	DKK4	0.114986	0.342781	0.144292	16.6958	-3.12047	2.13732	-1.45999
ENSG00000255328.1	AC136475.5	0.115495	NA	0.162541	0.972785	-3.1141	2.22981	-1.39658
ENSG00000236241.1	AC119744.1	0.115674	NA	0.111423	1.01342	-3.11186	1.95489	-1.59183
ENSG00000212402.1	SNORA74B	0.115723	NA	0.182512	1.02029	-3.11125	2.33392	-1.33306
ENSG00000286291.1	AC004047.1	0.115745	0.236225	0.0822096	3.1576	-3.11098	1.78997	-1.73801
ENSG00000286043.1	AC091214.1	0.116023	NA	0.28585	0.97152	-3.10751	2.91165	-1.06727
ENSG00000167208.15	SNX20	0.116329	NA	0.293931	0.985374	-3.10372	2.95723	-1.04954
ENSG00000243355.1	AC012123.2	0.116501	NA	0.0402822	2.35114	-3.10158	1.51235	-2.05084
ENSG00000236922.10	LINC01378	0.116982	NA	0.0169717	2.63934	-3.09564	1.2967	-2.38732
ENSG00000197888.2	UGT2B17	0.11742	NA	NA	16.7854	-3.09025	1.7726	-1.74334
ENSG00000235077.1	AC073842.1	0.117565	NA	0.297989	0.980533	-3.08847	2.96752	-1.04076
ENSG00000256448.5	AP000763.3	0.117894	NA	0.178568	0.981589	-3.08443	2.29296	-1.34518
ENSG00000285781.1	AL117340.1	0.11797	NA	0.0908384	0.991316	-3.08351	1.82349	-1.69099
ENSG00000260626.1	AC136944.1	0.118071	NA	0.18972	1.00661	-3.08227	2.35035	-1.31141
ENSG00000287291.1	AC068286.2	0.118195	NA	0.1823	0.997764	-3.08076	2.30992	-1.33371
ENSG00000283071.1	LBHD2	0.118323	NA	0.109028	1.02082	-3.0792	1.9214	-1.60258
ENSG00000243659.1	FO393419.3	0.118557	NA	NA	0.93516	-3.07635	3.06015	-1.00529
ENSG00000213640.3	EEF1DP4	0.11861	NA	0.175392	0.960188	-3.0757	2.26976	-1.35508
ENSG00000105967.16	TFEC	0.118611	4.46903e-10	2.28992e-12	100.541	-3.07569	0.438408	-7.01558
ENSG00000213150.2	AL512430.1	0.119177	NA	0.100413	0.987507	-3.06882	1.86798	-1.64286
ENSG00000231310.3	TBL1XR1-AS1	0.119755	NA	0.317097	0.98559	-3.06184	3.06048	-1.00044
ENSG00000224286.6	LINC01142	0.119918	NA	0.0977051	0.983733	-3.05988	1.84766	-1.65608
ENSG00000176040.13	TMPRSS7	0.120114	NA	0.30132	0.943103	-3.05752	2.9581	-1.03361
ENSG00000258700.6	LINC00871	0.120591	NA	0.189844	0.97978	-3.05181	2.32777	-1.31104
ENSG00000237663.2	DNAJC19P7	0.120696	NA	0.118298	1.00284	-3.05056	1.95303	-1.56196
ENSG00000186086.18	NBPF6	0.120888	NA	0.30617	0.949407	-3.04826	2.97888	-1.02329
ENSG00000287453.1	AL359894.1	0.120978	NA	0.319196	0.954326	-3.04719	3.05909	-0.99611
ENSG00000254127.1	IGLCOR22-1	0.121459	NA	0.119086	0.968357	-3.04146	1.95138	-1.55862
ENSG00000223349.1	KLF2P3	0.121474	NA	0.186937	1.48965	-3.04128	2.30453	-1.3197
ENSG00000112319.19	EYA4	0.121512	2.70643e-06	5.7243e-08	943.682	-3.04083	0.560294	-5.42721
ENSG00000287143.1	AC117480.1	0.12182	NA	0.19516	0.947173	-3.03717	2.34447	-1.29547
ENSG00000287691.1	AL031602.2	0.121981	NA	0.306223	0.937418	-3.03527	2.96651	-1.02318
ENSG00000188991.3	SLC15A5	0.121981	NA	0.306223	0.937418	-3.03527	2.96651	-1.02318
ENSG00000258616.5	LINC02303	0.122356	NA	0.322136	0.95316	-3.03084	3.06122	-0.990077
ENSG00000258984.5	UBE2F-SCLY	0.12242	1.29267e-05	3.7165e-07	57.4069	-3.03008	0.596129	-5.08293
ENSG00000254089.2	AC016885.2	0.122615	NA	0.186005	0.927924	-3.02779	2.28946	-1.32249
ENSG00000147255.19	IGSF1	0.122683	0.000104925	4.49866e-06	16005.5	-3.027	0.659922	-4.5869
ENSG00000250125.4	LINC02232	0.122865	0.274052	0.102636	3.76666	-3.02485	1.85323	-1.63221
ENSG00000279304.1	AP003072.4	0.123053	NA	0.207023	0.959403	-3.02265	2.39552	-1.26179
ENSG00000229831.2	AC108039.2	0.12306	NA	0.130236	0.984854	-3.02256	1.9975	-1.51317
ENSG00000279523.1	AC040168.2	0.12306	NA	0.130236	0.984854	-3.02256	1.9975	-1.51317
ENSG00000134460.18	IL2RA	0.123294	NA	0.099883	0.936738	-3.01982	1.83529	-1.64542
ENSG00000105996.7	HOXA2	0.123794	4.14109e-07	6.19119e-09	35.9688	-3.01399	0.518624	-5.81151
ENSG00000250037.1	AC091965.2	0.123832	NA	0.324971	0.948357	-3.01354	3.06163	-0.984294
ENSG00000125869.10	LAMP5	0.124054	7.54188e-08	8.83934e-10	398.609	-3.01095	0.491258	-6.12907
ENSG00000168309.18	FAM107A	0.124311	2.34217e-11	6.80107e-14	1311.93	-3.00797	0.401509	-7.49165
ENSG00000253161.5	LINC01605	0.124389	0.00235761	0.000200729	34.1381	-3.00707	0.808765	-3.7181
ENSG00000285548.1	AC068725.1	0.124476	NA	0.0711222	2.27104	-3.00606	1.66569	-1.8047
ENSG00000287633.1	AL161640.4	0.12481	NA	0.315117	0.920099	-3.00219	2.98861	-1.00454
ENSG00000237897.2	AL512844.2	0.12488	NA	0.313661	0.913617	-3.00138	2.97884	-1.00757
ENSG00000219186.2	FTH1P19	0.125021	NA	0.140497	0.958022	-2.99976	2.03519	-1.47394
ENSG00000286751.1	AC140168.1	0.125082	NA	0.116093	0.947765	-2.99906	1.90855	-1.57139
ENSG00000278572.1	AL355877.2	0.125138	NA	0.313429	0.90413	-2.99841	2.97445	-1.00805
ENSG00000180697.9	C3orf22	0.125299	NA	0.192702	0.927074	-2.99656	2.30039	-1.30263
ENSG00000169427.8	KCNK9	0.125523	3.05071e-08	3.10594e-10	54.0571	-2.99398	0.475734	-6.2934
ENSG00000238358.2	AC004969.1	0.125525	NA	0.0418887	2.22661	-2.99396	1.4715	-2.03462
ENSG00000240632.6	SPATA31D5P	0.125794	NA	0.202999	0.939267	-2.99086	2.34936	-1.27305
ENSG00000232401.2	LINC00112	0.126187	NA	0.207102	0.912934	-2.98637	2.36718	-1.26157
ENSG00000238181.2	AHCYP2	0.126859	NA	0.11097	0.90934	-2.9787	1.86887	-1.59385
ENSG00000280350.1	LINC01726	0.127191	NA	0.331358	0.915079	-2.97493	3.06257	-0.971383
ENSG00000239705.2	AL354710.2	0.127499	NA	0.202642	0.903172	-2.97144	2.33226	-1.27406
ENSG00000179571.10	NBPF17P	0.12753	NA	0.321011	0.889152	-2.97109	2.9939	-0.992382
ENSG00000225619.1	MYT1L-AS1	0.127762	NA	0.324095	0.912193	-2.96846	3.01037	-0.986078
ENSG00000287824.1	AL627443.3	0.1279	NA	0.203153	0.891956	-2.96691	2.33134	-1.27262
ENSG00000271952.2	LINC01954	0.128012	NA	0.199553	0.90909	-2.96565	2.31181	-1.28283
ENSG00000227088.2	AC012494.1	0.128012	NA	0.0536175	2.92988	-2.96565	1.53667	-1.92991
ENSG00000163221.9	S100A12	0.128192	0.362361	0.157291	14.3111	-2.96362	2.09555	-1.41424
ENSG00000269933.1	AL031429.2	0.128406	NA	0.0216787	2.14692	-2.96121	1.28975	-2.29595
ENSG00000286559.1	AC099845.1	0.128426	NA	0.333684	0.901647	-2.96099	3.06292	-0.96672
ENSG00000287813.1	AC016705.3	0.12865	NA	0.210849	0.904894	-2.95847	2.36444	-1.25124
ENSG00000184361.13	SPATA32	0.129183	0.127601	0.034157	5.47742	-2.95251	1.39387	-2.11821
ENSG00000254305.1	MRPL9P1	0.1292	NA	0.103506	0.876339	-2.95233	1.81337	-1.62809
ENSG00000147606.9	SLC26A7	0.129233	4.89475e-10	2.59696e-12	378.249	-2.95195	0.421829	-6.99797
ENSG00000228740.3	GABRG3-AS1	0.129832	NA	0.214203	0.904644	-2.94528	2.37122	-1.24209
ENSG00000249069.8	LINC01033	0.130095	NA	0.32989	0.884132	-2.94236	3.01987	-0.974335
ENSG00000253737.1	AP003469.3	0.130095	NA	0.32989	0.884132	-2.94236	3.01987	-0.974335
ENSG00000255058.1	PDCL2P2	0.130541	NA	0.250473	0.914542	-2.93742	2.55606	-1.1492
ENSG00000109193.12	SULT1E1	0.130847	1.65514e-05	4.93664e-07	667.864	-2.93405	0.583454	-5.02876
ENSG00000234775.2	AC105940.2	0.130991	NA	0.338477	0.887967	-2.93246	3.06364	-0.95718
ENSG00000279391.1	AC116456.2	0.131168	NA	0.118115	0.882821	-2.93051	1.87525	-1.56273
ENSG00000259543.1	AC060809.1	0.131291	NA	0.326953	0.854527	-2.92916	2.98812	-0.980271
ENSG00000234661.2	CHL1-AS1	0.131419	NA	0.0160707	2.86111	-2.92775	1.21619	-2.40731
ENSG00000236546.1	MYCL-AS1	0.131486	NA	0.0593008	1.44519	-2.92702	1.55201	-1.88596
ENSG00000280150.1	AC148477.9	0.131569	NA	0.0331202	1.42522	-2.92611	1.37336	-2.13062
ENSG00000254864.1	AC107884.2	0.131689	NA	0.202857	0.861179	-2.92479	2.29674	-1.27345
ENSG00000253154.2	AC100801.1	0.131734	NA	0.207246	0.865724	-2.9243	2.31872	-1.26117
ENSG00000286870.1	AL121981.1	0.131752	NA	0.33588	0.876725	-2.9241	3.03854	-0.962337
ENSG00000237262.1	AC068492.1	0.13181	NA	0.20655	0.867876	-2.92347	2.3145	-1.26311
ENSG00000271666.1	AC008555.6	0.131819	NA	0.212235	0.872421	-2.92337	2.34349	-1.24744
ENSG00000228527.1	AC016396.1	0.131825	NA	0.208841	0.863331	-2.9233	2.32606	-1.25676
ENSG00000287750.1	AL353572.4	0.131849	0.0264754	0.00426814	6.38387	-2.92305	1.02289	-2.85763
ENSG00000231970.1	AL355490.3	0.131907	NA	0.0207483	2.93682	-2.92241	1.26372	-2.31253
ENSG00000250385.2	AC106772.2	0.131908	NA	0.100611	2.08428	-2.9224	1.77989	-1.6419
ENSG00000223754.1	AC008073.1	0.131987	NA	0.0486921	2.83323	-2.92154	1.48205	-1.97128
ENSG00000235690.2	CUBNP3	0.132151	NA	0.217494	0.890435	-2.91974	2.36758	-1.23322
ENSG00000187516.7	H2AP	0.132177	NA	0.240512	0.907173	-2.91946	2.48738	-1.17371
ENSG00000272096.2	RN7SL715P	0.132211	NA	0.154521	0.901926	-2.91908	2.05029	-1.42374
ENSG00000249148.2	AC006445.2	0.132406	NA	0.130657	0.885924	-2.91696	1.92982	-1.51152
ENSG00000276231.5	PIK3R6	0.13256	NA	0.341383	0.892964	-2.91528	3.06408	-0.951437
ENSG00000286750.1	AC015802.7	0.13256	NA	0.341383	0.892964	-2.91528	3.06408	-0.951437
ENSG00000147256.12	ARHGAP36	0.132841	1.72667e-07	2.24692e-09	216.834	-2.91223	0.487087	-5.97887
ENSG00000214988.4	RPL7AP26	0.132868	NA	0.127856	1.49974	-2.91193	1.91246	-1.52261
ENSG00000287844.1	AC018953.2	0.132963	NA	0.335166	0.859666	-2.9109	3.02036	-0.96376
ENSG00000204025.7	TRPC5OS	0.133015	NA	0.335207	0.853184	-2.91034	3.02003	-0.963679
ENSG00000179088.14	C12orf42	0.133202	NA	0.335901	0.854241	-2.90831	3.02226	-0.962296
ENSG00000226741.2	LINC02554	0.133819	NA	0.333853	0.841088	-2.90164	3.00258	-0.966382
ENSG00000248343.1	AC096576.2	0.134103	NA	0.146749	0.899525	-2.89858	1.99749	-1.45111
ENSG00000249082.2	C5orf66-AS1	0.13443	4.98501e-10	2.69846e-12	216.115	-2.89507	0.414019	-6.9926
ENSG00000278973.1	AC073592.2	0.134576	NA	0.156689	0.871534	-2.89351	2.04301	-1.4163
ENSG00000285708.1	AC097634.4	0.135208	0.0396819	0.0071611	4.07312	-2.88675	1.07344	-2.68926
ENSG00000251620.3	STPG2-AS1	0.135279	0.0532135	0.0105702	5.3709	-2.886	1.12884	-2.5566
ENSG00000220694.2	AL096711.1	0.135399	NA	0.342133	0.847499	-2.88471	3.03667	-0.949959
ENSG00000237210.1	AC073324.1	0.135566	NA	0.3469	0.87498	-2.88293	3.06492	-0.94062
ENSG00000249061.1	AC109492.1	0.135878	NA	0.347468	0.836739	-2.87962	3.06501	-0.939513
ENSG00000253245.2	MTND1P36	0.135899	NA	0.140042	0.861028	-2.87939	1.95129	-1.47563
ENSG00000227620.4	ALG1L8P	0.136199	NA	0.225489	0.826737	-2.87621	2.37299	-1.21206
ENSG00000283907.1	AD000090.1	0.136208	0.037087	0.00656784	5.93313	-2.87612	1.05818	-2.718
ENSG00000170442.12	KRT86	0.136474	NA	0.342444	0.827649	-2.8733	3.0266	-0.949347
ENSG00000213316.10	LTC4S	0.136571	NA	0.0505132	2.03318	-2.87228	1.46875	-1.95559
ENSG00000251129.2	LINC02506	0.137149	8.49546e-16	4.26372e-19	111.889	-2.86618	0.320964	-8.92991
ENSG00000237979.1	AC007389.4	0.137455	NA	0.238695	0.867332	-2.86297	2.42984	-1.17825
ENSG00000239508.1	PLCH1-AS1	0.137586	0.0976469	0.0237343	4.17704	-2.86159	1.2654	-2.2614
ENSG00000176349.11	AC104129.1	0.137767	NA	0.217944	0.820666	-2.8597	2.32116	-1.23201
ENSG00000281186.1	LINC00706	0.137871	NA	0.226123	0.829756	-2.85861	2.3617	-1.21041
ENSG00000277521.1	MIR8078	0.138243	NA	0.231436	0.832788	-2.85472	2.38556	-1.19667
ENSG00000259483.1	AL355073.1	0.138606	NA	0.0480143	2.73028	-2.85094	1.44188	-1.97724
ENSG00000110448.11	CD5	0.138638	0.00155662	0.000120869	13.5573	-2.8506	0.741503	-3.84436
ENSG00000266835.6	GAPLINC	0.138721	NA	0.352618	0.856996	-2.84974	3.06581	-0.929524
ENSG00000239774.1	AC125618.2	0.138948	NA	0.0571628	2.72252	-2.84738	1.497	-1.90206
ENSG00000224875.2	EML4-AS1	0.13901	NA	0.224004	0.799904	-2.84674	2.34116	-1.21595
ENSG00000264232.2	LINC01916	0.139155	NA	0.23053	0.795359	-2.84524	2.37302	-1.19899
ENSG00000250741.6	NT5C1B-RDH14	0.139205	NA	NA	0.791289	-2.84471	3.06594	-0.927843
ENSG00000272772.1	AC104109.3	0.139443	NA	0.347732	1.39168	-2.84226	3.02691	-0.938997
ENSG00000259881.1	AC092384.2	0.140191	NA	0.349831	0.800575	-2.83454	3.03186	-0.934917
ENSG00000229316.1	HMGB1P45	0.140242	NA	0.239582	0.846004	-2.83401	2.40981	-1.17603
ENSG00000225386.2	AC099754.1	0.140542	0.141375	0.0394756	8.08106	-2.83092	1.37477	-2.05919
ENSG00000284188.2	AL451007.3	0.140922	NA	0.237535	0.821716	-2.82703	2.39342	-1.18117
ENSG00000279811.1	AC093330.2	0.140957	NA	0.228119	0.80053	-2.82667	2.34536	-1.20522
ENSG00000262768.2	AC100791.2	0.141093	NA	0.227491	0.807227	-2.82529	2.34105	-1.20685
ENSG00000258624.1	SERPINE4P	0.141575	NA	0.24661	0.810259	-2.82037	2.43424	-1.15862
ENSG00000188162.11	OTOG	0.141669	0.00111809	8.0084e-05	29.1912	-2.81941	0.714832	-3.94415
ENSG00000167914.12	GSDMA	0.141695	NA	0.238849	0.826227	-2.81914	2.39343	-1.17787
ENSG00000276645.1	AL020995.2	0.141742	NA	0.271457	0.842965	-2.81866	2.56309	-1.09971
ENSG00000228643.1	AC079779.2	0.141917	0.206232	0.0676179	4.97255	-2.81688	1.54135	-1.82754
ENSG00000186971.3	KRTAP13-4	0.142039	NA	0.358555	0.839012	-2.81564	3.06674	-0.918122
ENSG00000243303.1	AC103987.2	0.142166	NA	0.358781	0.812196	-2.81435	3.06677	-0.917691
ENSG00000287587.1	AL158216.1	0.142166	NA	0.358781	0.812196	-2.81435	3.06677	-0.917691
ENSG00000263639.7	MSMB	0.142166	NA	0.358781	0.812196	-2.81435	3.06677	-0.917691
ENSG00000171489.10	SPACA5	0.142426	NA	0.069645	1.38914	-2.81172	1.54983	-1.81421
ENSG00000264666.1	AC020558.1	0.14277	NA	0.359852	0.822274	-2.80824	3.06694	-0.915648
ENSG00000262503.1	AC027763.1	0.143105	0.239075	0.0838369	3.17518	-2.80486	1.62239	-1.72884
ENSG00000214857.4	SEM1P1	0.143107	NA	0.357955	0.787137	-2.80483	3.05116	-0.919269
ENSG00000240601.1	RPL9P15	0.143155	NA	0.360534	0.814975	-2.80435	3.06705	-0.914348
ENSG00000258467.1	PHKBP2	0.143159	NA	0.230264	0.788402	-2.80431	2.33755	-1.19968
ENSG00000273792.1	AC022898.2	0.143216	NA	0.043315	2.2233	-2.80373	1.38753	-2.02066
ENSG00000186009.5	ATP4B	0.143437	NA	0.357992	0.782592	-2.80151	3.04778	-0.919198
ENSG00000225286.1	AC005105.1	0.143441	NA	0.36104	0.824981	-2.80147	3.06713	-0.913384
ENSG00000220581.1	VN1R12P	0.143553	NA	0.0759131	1.36781	-2.80035	1.57774	-1.77491
ENSG00000142700.12	DMRTA2	0.143786	3.5785e-11	1.14173e-13	755.497	-2.798	0.376918	-7.42337
ENSG00000240733.3	RN7SL502P	0.144045	NA	0.168877	0.841028	-2.79541	2.03182	-1.37582
ENSG00000257826.1	AL133304.2	0.144058	NA	0.0618439	1.90574	-2.79528	1.49687	-1.86741
ENSG00000254333.1	NDST1-AS1	0.144303	NA	0.234504	0.778002	-2.79283	2.34922	-1.18884
ENSG00000228322.1	AL162419.1	0.144376	NA	0.135917	3.08531	-2.79209	1.87242	-1.49117
ENSG00000231261.1	HMGN2P10	0.144443	NA	0.145144	0.820372	-2.79143	1.91601	-1.4569
ENSG00000257893.3	LINC02404	0.144693	NA	0.0722993	2.63142	-2.78894	1.5518	-1.79723
ENSG00000251613.4	AC063979.2	0.145	NA	0.363788	0.793547	-2.78587	3.06757	-0.90817
ENSG00000287286.1	AC024560.5	0.145196	0.594844	0.347438	5.15672	-2.78392	2.96298	-0.93957
ENSG00000088320.4	REM1	0.145413	0.0125282	0.00161728	9.82012	-2.78177	0.882326	-3.15277
ENSG00000228470.1	AL929236.1	0.145555	NA	0.364762	0.78773	-2.78036	3.06772	-0.906328
ENSG00000223890.1	AC008171.1	0.145559	NA	0.364768	0.800694	-2.78033	3.06772	-0.906317
ENSG00000271392.1	AC006237.1	0.145798	NA	0.365188	0.782305	-2.77796	3.06779	-0.905524
ENSG00000105550.10	FGF21	0.145798	NA	0.365188	0.782305	-2.77796	3.06779	-0.905524
ENSG00000233191.2	AC006372.2	0.145966	NA	0.0723224	2.62135	-2.77629	1.54489	-1.79708
ENSG00000205445.3	KRTAP10-2	0.146012	NA	0.165309	0.815397	-2.77584	2.0007	-1.38743
ENSG00000247699.2	FABP6-AS1	0.14615	NA	0.365804	0.773698	-2.77448	3.06789	-0.904361
ENSG00000233729.1	NCKAP5-AS1	0.146161	NA	0.247906	0.772785	-2.77437	2.40111	-1.15545
ENSG00000203581.7	OR1F2P	0.146196	NA	0.24988	0.793539	-2.77403	2.41085	-1.15064
ENSG00000225358.1	MIPEPP1	0.146244	NA	0.365968	0.80429	-2.77355	3.06791	-0.904051
ENSG00000223823.1	LINC01342	0.146496	NA	0.252543	0.80454	-2.77107	2.42185	-1.14419
ENSG00000228262.10	LINC01320	0.146717	0.00305617	0.000279268	16.2001	-2.76889	0.761981	-3.63381
ENSG00000230676.1	AL353803.2	0.146837	NA	0.366249	0.764608	-2.76771	3.06324	-0.903522
ENSG00000282246.1	AL157392.5	0.146876	0.591747	0.344267	9.85379	-2.76733	2.92601	-0.945768
ENSG00000213401.10	MAGEA12	0.146941	NA	0.367185	0.787552	-2.76669	3.06811	-0.901759
ENSG00000234132.2	AL358473.2	0.147966	NA	0.368969	0.797798	-2.75666	3.06839	-0.898406
ENSG00000254532.2	AL358944.1	0.147991	NA	0.246263	0.764563	-2.75642	2.3773	-1.15947
ENSG00000241661.1	PPP1R2P6	0.148264	NA	0.155137	0.802388	-2.75376	1.93706	-1.42162
ENSG00000163331.12	DAPL1	0.148281	0.00280826	0.000251178	27.2841	-2.75359	0.75213	-3.66106
ENSG00000230490.3	AL139383.1	0.148292	0.000534235	3.21747e-05	13.0815	-2.75349	0.662295	-4.1575
ENSG00000160856.21	FCRL3	0.14894	NA	NA	0.737337	-2.7472	3.06867	-0.895242
ENSG00000288088.1	AL606923.2	0.148999	NA	0.166626	1.26478	-2.74663	1.98581	-1.38313
ENSG00000224944.2	CASC6	0.149055	NA	0.370856	0.7801	-2.74609	3.0687	-0.894871
ENSG00000254039.1	AC027801.4	0.149055	NA	0.370856	0.7801	-2.74609	3.0687	-0.894871
ENSG00000137976.7	DNASE2B	0.14909	NA	0.370918	0.769747	-2.74574	3.06871	-0.894755
ENSG00000234593.3	KAZN-AS1	0.149097	NA	0.167099	0.79978	-2.74568	1.98734	-1.38158
ENSG00000265533.1	AC114689.3	0.149106	NA	0.370946	0.787748	-2.74559	3.06871	-0.894703
ENSG00000269300.1	AC008734.1	0.149106	NA	0.370946	0.787748	-2.74559	3.06871	-0.894703
ENSG00000198774.5	RASSF9	0.149113	2.29141e-10	1.05145e-12	370.277	-2.74553	0.385413	-7.1236
ENSG00000259508.1	AL132801.2	0.149122	NA	0.370972	0.776228	-2.74544	3.06872	-0.894654
ENSG00000274666.1	AL133370.2	0.14916	NA	0.371039	0.795397	-2.74507	3.06873	-0.894529
ENSG00000137757.11	CASP5	0.149215	NA	0.371133	0.803045	-2.74454	3.06874	-0.894353
ENSG00000248101.2	AC002116.1	0.149215	NA	0.371133	0.803045	-2.74454	3.06874	-0.894353
ENSG00000171815.6	PCDHB1	0.149385	4.4141e-13	7.27904e-16	88.6766	-2.74289	0.340067	-8.06575
ENSG00000274560.1	AC010205.1	0.149901	NA	0.252341	0.77101	-2.73792	2.39186	-1.14468
ENSG00000271901.2	AL161716.1	0.149901	NA	0.261489	0.775555	-2.73791	2.4383	-1.12288
ENSG00000215274.5	GAGE10	0.150023	NA	0.372529	0.751169	-2.73674	3.06897	-0.891747
ENSG00000186940.6	CHCHD2P9	0.150175	0.0297726	0.00498592	3.81496	-2.73528	0.974123	-2.80794
ENSG00000284048.2	AC073111.3	0.150317	0.0139425	0.00185833	15.0197	-2.73392	0.878512	-3.11199
ENSG00000233847.1	ERCC8-AS1	0.150422	NA	0.247911	0.752434	-2.73291	2.36526	-1.15544
ENSG00000242020.3	RN7SL68P	0.150996	NA	0.0449487	2.81507	-2.72742	1.36022	-2.00513
ENSG00000166006.14	KCNC2	0.150996	0.0038893	0.00037213	15.8779	-2.72741	0.766322	-3.5591
ENSG00000149735.7	GPHA2	0.151236	2.74766e-06	5.84106e-08	24.9998	-2.72513	0.502457	-5.4236
ENSG00000162366.8	PDZK1IP1	0.151402	NA	0.374899	0.768822	-2.72354	3.06935	-0.887334
ENSG00000249797.2	LINC02147	0.151439	NA	0.374963	0.778757	-2.72319	3.06936	-0.887216
ENSG00000224007.1	USP12P2	0.151439	NA	0.374963	0.778757	-2.72319	3.06936	-0.887216
ENSG00000282308.1	DPRXP3	0.151815	NA	0.201778	0.787542	-2.71962	2.13052	-1.2765
ENSG00000128918.15	ALDH1A2	0.151982	4.59754e-05	1.66959e-06	1352.05	-2.71803	0.567463	-4.78979
ENSG00000279466.1	AC073911.1	0.152033	NA	0.287318	0.757821	-2.71754	2.55402	-1.06402
ENSG00000249216.1	AC105389.2	0.152133	NA	0.260178	0.755428	-2.71659	2.41267	-1.12597
ENSG00000287727.1	AL139423.2	0.152283	0.0668972	0.0143171	4.9363	-2.71518	1.10859	-2.44921
ENSG00000259867.6	AC105411.1	0.152321	0.0250236	0.00397249	8.1343	-2.71481	0.942533	-2.88034
ENSG00000154165.5	GPR15	0.152405	NA	0.191908	0.791101	-2.71402	2.07978	-1.30495
ENSG00000248698.6	LINC01085	0.152679	NA	0.0393015	2.56349	-2.71142	1.31558	-2.06102
ENSG00000286089.1	AC095057.4	0.15268	NA	0.377084	0.738799	-2.71142	3.06971	-0.883282
ENSG00000258745.1	AL358334.3	0.152706	NA	0.274159	0.782532	-2.71117	2.47927	-1.09353
ENSG00000236501.6	AC074286.1	0.152781	NA	0.157405	1.29222	-2.71046	1.91708	-1.41385
ENSG00000286307.1	AC017028.1	0.152809	NA	0.377305	0.751763	-2.7102	3.06975	-0.882873
ENSG00000127324.9	TSPAN8	0.152909	NA	NA	25.4698	-2.70926	1.84723	-1.46666
ENSG00000258123.1	LINC02444	0.15294	0.217329	0.0731649	3.18172	-2.70896	1.51187	-1.7918
ENSG00000225431.1	LINC01671	0.153036	NA	0.377691	0.746338	-2.70806	3.06981	-0.882158
ENSG00000218180.2	SLC25A5P7	0.153149	NA	0.120614	0.799565	-2.70699	1.74397	-1.5522
ENSG00000165092.13	ALDH1A1	0.153507	1.25756e-09	7.84425e-12	3426.58	-2.70362	0.395187	-6.84136
ENSG00000234929.2	AC018685.2	0.15368	NA	0.082012	2.45869	-2.70199	1.55365	-1.73913
ENSG00000244215.2	LINC02016	0.153749	NA	0.25993	0.748481	-2.70135	2.39788	-1.12656
ENSG00000230062.5	ANKRD66	0.153865	NA	0.141318	3.06329	-2.70026	1.83579	-1.4709
ENSG00000200296.1	RNU1-83P	0.154584	NA	0.292642	0.743541	-2.69354	2.55956	-1.05234
ENSG00000241358.1	AC069528.1	0.154876	0.19298	0.0612736	3.184	-2.69082	1.43777	-1.87152
ENSG00000252777.1	AL645729.1	0.154878	NA	0.276648	0.76522	-2.69079	2.47343	-1.08788
ENSG00000243620.2	AC092957.1	0.154895	7.45555e-07	1.22945e-08	39.9667	-2.69064	0.472407	-5.69559
ENSG00000112273.7	HDGFL1	0.155058	NA	0.0750131	1.99201	-2.68912	1.51042	-1.78038
ENSG00000228955.2	AL591623.2	0.155484	NA	0.267076	0.736387	-2.68516	2.41945	-1.10982
ENSG00000205364.4	MT1M	0.155759	0.117401	0.0303909	4.7729	-2.68262	1.23911	-2.16496
ENSG00000239736.2	CEACAMP3	0.156042	NA	0.160754	1.79952	-2.67999	1.91081	-1.40254
ENSG00000124449.7	IRGC	0.156124	NA	0.382922	0.739596	-2.67924	3.07067	-0.872525
ENSG00000120088.15	CRHR1	0.156127	0.05131	0.0100486	9.37153	-2.6792	1.04081	-2.57415
ENSG00000229009.7	TMPRSS11GP	0.156404	NA	0.166911	0.721227	-2.67665	1.93652	-1.3822
ENSG00000248751.6	AC004997.1	0.156472	NA	NA	17.7018	-2.67602	1.22229	-2.18936
ENSG00000201920.1	RNA5SP442	0.156546	NA	0.177414	0.746644	-2.67534	1.98355	-1.34876
ENSG00000273958.1	AC009560.1	0.156688	0.0112004	0.00140675	7.48763	-2.67404	0.837399	-3.19326
ENSG00000233765.1	AL591479.1	0.156727	NA	0.383937	0.733779	-2.67367	3.07084	-0.870666
ENSG00000152266.7	PTH	0.156727	NA	0.383937	0.733779	-2.67367	3.07084	-0.870666
ENSG00000230327.1	MTCO1P42	0.156747	NA	0.0348955	2.56485	-2.67349	1.26732	-2.10957
ENSG00000285697.1	AC002059.3	0.156943	NA	0.3843	0.728354	-2.67169	3.0709	-0.870001
ENSG00000286741.1	AC008766.1	0.157241	NA	0.265202	0.709985	-2.66895	2.39543	-1.11418
ENSG00000285698.1	AL049825.1	0.157255	NA	0.384824	0.719746	-2.66882	3.07099	-0.869043
ENSG00000218357.3	LINC01644	0.15728	NA	0.0763269	1.80433	-2.66859	1.50563	-1.77241
ENSG00000261044.1	AP006547.1	0.157284	NA	0.102854	1.2142	-2.66856	1.63597	-1.63117
ENSG00000139155.8	SLCO1C1	0.157366	6.14325e-05	2.35864e-06	702.681	-2.66781	0.565215	-4.71998
ENSG00000285922.1	AC104453.1	0.157754	NA	0.385659	0.717112	-2.66425	3.07112	-0.867517
ENSG00000250948.1	AC091180.5	0.157983	NA	0.386042	0.710656	-2.66216	3.07119	-0.866818
ENSG00000099812.9	MISP	0.158246	7.3018e-10	4.26669e-12	335.409	-2.65976	0.383911	-6.92805
ENSG00000248790.1	AC097103.1	0.158664	NA	0.313076	0.746814	-2.65596	2.63282	-1.00879
ENSG00000233579.1	KRT8P15	0.158768	NA	0.0948956	1.23561	-2.65501	1.58971	-1.67012
ENSG00000273198.1	AL096803.3	0.158894	NA	0.0859462	2.01844	-2.65387	1.54548	-1.71718
ENSG00000171747.9	LGALS4	0.158989	0.0667777	0.0142844	12.1756	-2.653	1.08284	-2.45003
ENSG00000271892.1	AC026790.2	0.159727	NA	0.0877571	1.98013	-2.64632	1.54996	-1.70735
ENSG00000260035.1	AC051619.7	0.159932	NA	0.0411584	1.77636	-2.64447	1.29508	-2.04193
ENSG00000165178.9	NCF1C	0.160242	NA	0.389804	0.721612	-2.64168	3.07182	-0.859973
ENSG00000265204.1	AC090772.2	0.160242	NA	0.389804	0.721612	-2.64168	3.07182	-0.859973
ENSG00000227877.7	MRLN	0.160416	0.0854141	0.019909	6.5263	-2.64011	1.13404	-2.32806
ENSG00000226957.1	AL358075.1	0.160712	NA	0.390584	0.709313	-2.63745	3.07195	-0.858559
ENSG00000250045.2	CBX3P3	0.160881	NA	0.0970967	1.26157	-2.63593	1.58878	-1.65909
ENSG00000185467.7	KPNA7	0.161063	NA	0.391164	0.71037	-2.6343	3.07205	-0.857508
ENSG00000170577.8	SIX2	0.161395	8.96778e-09	7.81205e-11	678.454	-2.63133	0.40456	-6.50418
ENSG00000167613.16	LAIR1	0.161473	NA	0.121894	0.708954	-2.63063	1.70062	-1.54687
ENSG00000235461.2	AC003001.1	0.161504	NA	0.274797	0.692001	-2.63035	2.40857	-1.09208
ENSG00000259080.1	AC074091.2	0.161517	0.0118825	0.00151475	15.3095	-2.63024	0.829247	-3.17184
ENSG00000286874.1	AC072054.1	0.161539	NA	0.185884	0.7147	-2.63004	1.98816	-1.32285
ENSG00000250895.1	AC010409.2	0.162294	NA	0.071065	1.24143	-2.62332	1.45331	-1.80506
ENSG00000173124.14	ACSM6	0.162312	0.100659	0.0247254	5.23614	-2.62316	1.1681	-2.24567
ENSG00000259430.2	CERS3-AS1	0.162431	NA	0.285443	0.712092	-2.6221	2.45476	-1.06817
ENSG00000163121.10	NEURL3	0.162495	NA	0.171804	1.98678	-2.62153	1.91852	-1.36643
ENSG00000257271.1	KIRREL3-AS1	0.16271	NA	0.39388	0.715617	-2.61962	3.0725	-0.852602
ENSG00000266365.1	AC053481.3	0.162822	0.18576	0.058042	4.53861	-2.61863	1.38159	-1.89538
ENSG00000285971.1	AC023095.1	0.162936	NA	0.0571544	2.97808	-2.61762	1.37616	-1.90213
ENSG00000239480.1	AC073517.1	0.163068	NA	0.0733818	1.70926	-2.61646	1.46134	-1.79045
ENSG00000264705.1	AC090337.1	0.163372	NA	0.287347	0.707332	-2.61376	2.45664	-1.06396
ENSG00000237265.6	BX276092.7	0.163765	NA	0.39561	0.71487	-2.6103	3.0728	-0.849487
ENSG00000259017.1	AL133163.3	0.163765	NA	0.39561	0.71487	-2.6103	3.0728	-0.849487
ENSG00000213061.2	PFN1P11	0.163765	NA	0.39561	0.71487	-2.6103	3.0728	-0.849487
ENSG00000111701.7	APOBEC1	0.163765	NA	0.39561	0.71487	-2.6103	3.0728	-0.849487
ENSG00000168333.13	PPDPFL	0.163765	NA	0.39561	0.71487	-2.6103	3.0728	-0.849487
ENSG00000267529.3	AP005131.4	0.163851	NA	0.184074	0.685474	-2.60954	1.96455	-1.32832
ENSG00000181656.7	GPR88	0.164	0.0193756	0.0028351	10.4284	-2.60824	0.873759	-2.98507
ENSG00000285972.1	CERNA2	0.164079	0.0454337	0.00856718	23.6183	-2.60754	0.991889	-2.62886
ENSG00000275512.1	AC007998.4	0.164156	NA	0.174475	1.22458	-2.60686	1.91968	-1.35797
ENSG00000245067.7	IGFBP7-AS1	0.164266	0.00939298	0.00112871	8.04057	-2.60589	0.800259	-3.25631
ENSG00000236938.1	AC003092.2	0.164286	NA	0.396463	0.706021	-2.60572	3.07294	-0.847955
ENSG00000274719.1	AC012653.2	0.164506	0.00219463	0.000183784	9.13511	-2.60378	0.696139	-3.74032
ENSG00000199497.1	RNU1-94P	0.164689	NA	0.185481	0.680714	-2.60218	1.96529	-1.32407
ENSG00000204572.10	KRTAP5-10	0.164804	NA	0.0338342	1.82226	-2.60118	1.22579	-2.12204
ENSG00000246790.2	AP000977.1	0.16495	NA	0.0338783	2.43711	-2.5999	1.22549	-2.12152
ENSG00000237452.3	BHMG1	0.165231	NA	0.398004	0.697811	-2.59744	3.07321	-0.845191
ENSG00000285792.1	AC040169.4	0.165415	NA	0.398304	0.692386	-2.59584	3.07326	-0.844653
ENSG00000236172.7	MIR7515HG	0.165557	NA	0.398535	0.720117	-2.5946	3.0733	-0.844241
ENSG00000237068.1	RPL5P2	0.165557	NA	0.398535	0.720117	-2.5946	3.0733	-0.844241
ENSG00000183549.10	ACSM5	0.165557	NA	0.398535	0.720117	-2.5946	3.0733	-0.844241
ENSG00000286011.1	AC062037.4	0.165679	0.12673	0.0338098	5.1253	-2.59353	1.22202	-2.12233
ENSG00000218643.2	RPL5P20	0.165682	NA	0.181456	1.15286	-2.59351	1.94084	-1.33629
ENSG00000286823.1	AL583829.1	0.165683	NA	0.39874	0.683779	-2.5935	3.07333	-0.843874
ENSG00000259760.1	AC015660.2	0.165817	NA	0.398958	0.70362	-2.59234	3.07337	-0.843484
ENSG00000158525.15	CPA5	0.165999	0.34977	0.148723	3.53565	-2.59075	1.79408	-1.44406
ENSG00000253479.6	LINC01603	0.16608	NA	0.399385	0.711268	-2.59005	3.07344	-0.84272
ENSG00000223062.1	RNU6-1245P	0.16608	NA	0.399385	0.711268	-2.59005	3.07344	-0.84272
ENSG00000230690.2	AC013402.1	0.16619	NA	0.28645	0.678562	-2.5891	2.42893	-1.06594
ENSG00000225637.1	AP001046.1	0.166227	NA	0.399623	0.681144	-2.58878	3.07348	-0.842294
ENSG00000233708.1	AL512353.2	0.166421	NA	0.399938	0.674689	-2.58709	3.07354	-0.841732
ENSG00000286765.1	AP005899.2	0.166426	NA	0.295956	0.683107	-2.58705	2.4753	-1.04514
ENSG00000278313.1	AC100827.5	0.166737	NA	0.40045	0.714371	-2.58436	3.07362	-0.840818
ENSG00000285838.2	AL646090.2	0.166737	NA	0.40045	0.714371	-2.58436	3.07362	-0.840818
ENSG00000282602.1	Z82244.2	0.166844	NA	0.322641	0.712469	-2.58343	2.61204	-0.989046
ENSG00000260798.1	AC099314.1	0.166891	NA	0.4007	0.70059	-2.58302	3.07367	-0.840372
ENSG00000253633.2	AP002852.1	0.167229	NA	0.401247	0.697633	-2.5801	3.07376	-0.839396
ENSG00000182533.7	CAV3	0.167279	NA	0.298851	0.703379	-2.57967	2.48308	-1.0389
ENSG00000249959.6	AC024587.2	0.167414	0.349157	0.148274	4.19731	-2.57851	1.78363	-1.44565
ENSG00000172362.3	OR5B12	0.167708	NA	0.402021	0.710597	-2.57598	3.07389	-0.838018
ENSG00000279815.1	AC020763.5	0.168004	NA	0.113352	1.87935	-2.57343	1.62535	-1.58331
ENSG00000187475.6	H1-6	0.168049	NA	0.299084	0.689348	-2.57304	2.47789	-1.0384
ENSG00000225191.1	AL136455.1	0.168092	NA	0.167273	0.722133	-2.57267	1.86288	-1.38102
ENSG00000227972.1	THAP12P3	0.168391	NA	0.0421606	1.81742	-2.57011	1.26486	-2.03193
ENSG00000288569.1	AC008394.1	0.168466	NA	0.403242	0.686981	-2.56947	3.0741	-0.835845
ENSG00000287476.1	AC018437.3	0.168867	NA	0.303518	0.682436	-2.56604	2.49392	-1.02892
ENSG00000248456.1	LINC02485	0.168932	NA	0.159672	2.8264	-2.56548	1.82444	-1.40618
ENSG00000166573.6	GALR1	0.168933	3.57174e-05	1.24585e-06	54.7386	-2.56547	0.52916	-4.8482
ENSG00000280614.1	FP236383.4	0.168973	7.53547e-08	8.77945e-10	13795.7	-2.56513	0.418445	-6.13015
ENSG00000280800.1	FP671120.7	0.16898	7.53547e-08	8.73813e-10	13794.3	-2.56507	0.418384	-6.1309
ENSG00000281181.1	FP236383.5	0.168989	7.54188e-08	8.84099e-10	13796.4	-2.565	0.418499	-6.12904
ENSG00000259774.1	AC243562.3	0.169085	NA	0.0717788	2.30547	-2.56418	1.42413	-1.80052
ENSG00000270919.1	AC108451.2	0.169227	NA	0.30549	0.667705	-2.56297	2.50111	-1.02473
ENSG00000171695.10	LKAAEAR1	0.169594	NA	0.405056	0.673346	-2.55984	3.07442	-0.832626
ENSG00000281383.1	FP671120.8	0.169791	5.15437e-08	5.7281e-10	9965.37	-2.55817	0.412758	-6.19774
ENSG00000198178.10	CLEC4C	0.169858	NA	0.405478	0.679827	-2.5576	3.07449	-0.831877
ENSG00000267239.1	AP001198.1	0.169858	NA	0.405478	0.679827	-2.5576	3.07449	-0.831877
ENSG00000213561.4	AC103591.2	0.169974	NA	0.328616	0.684372	-2.55661	2.61705	-0.976905
ENSG00000105383.15	CD33	0.170129	NA	0.405912	0.686309	-2.5553	3.07457	-0.83111
ENSG00000249680.2	TUBA3GP	0.170129	NA	0.405912	0.686309	-2.5553	3.07457	-0.83111
ENSG00000243150.6	AC106707.1	0.170259	NA	0.40612	0.665795	-2.5542	3.0746	-0.830742
ENSG00000272239.1	AC011373.1	0.170364	NA	0.204516	1.18627	-2.55331	2.0124	-1.26879
ENSG00000188511.12	C22orf34	0.17047	0.15921	0.0465957	5.69886	-2.55241	1.28265	-1.98996
ENSG00000185903.10	OR11N1P	0.171283	NA	0.31092	0.665123	-2.54554	2.51215	-1.01329
ENSG00000269476.1	AC010326.2	0.171347	0.110572	0.0280801	5.5417	-2.54501	1.15884	-2.19617
ENSG00000232023.3	LINC01807	0.17147	NA	0.176592	1.86465	-2.54397	1.88258	-1.35132
ENSG00000250101.1	AC106795.3	0.171666	NA	0.0809587	1.14799	-2.54233	1.4568	-1.74515
ENSG00000229151.2	AC233976.1	0.171729	NA	0.408466	0.647615	-2.54179	3.07501	-0.826597
ENSG00000254863.2	LINC02744	0.171755	0.10702	0.0268723	5.10305	-2.54157	1.14828	-2.21337
ENSG00000287507.1	AP001053.1	0.172022	NA	0.408932	0.679649	-2.53933	3.07509	-0.825775
ENSG00000174255.7	ZNF80	0.172133	NA	0.103731	1.6739	-2.5384	1.56015	-1.62703
ENSG00000276403.1	AC105105.4	0.172221	NA	0.310422	0.685395	-2.53767	2.5018	-1.01434
ENSG00000183631.5	PRR32	0.172502	0.280769	0.106556	5.80726	-2.53532	1.57096	-1.61387
ENSG00000227968.1	BUB3P1	0.1726	NA	0.233349	0.7051	-2.5345	2.12665	-1.19178
ENSG00000243254.3	RN7SL350P	0.172603	NA	0.331239	0.66706	-2.53447	2.60849	-0.971622
ENSG00000166143.10	PPP1R14D	0.173051	NA	0.194284	1.11205	-2.53073	1.9497	-1.29801
ENSG00000227835.8	CARM1P1	0.173175	NA	NA	0.629434	-2.5297	3.07541	-0.822556
ENSG00000286543.1	AC138409.3	0.173183	0.17402	0.0530265	7.69948	-2.52963	1.3075	-1.93471
ENSG00000213785.3	AKR1B1P3	0.173671	NA	0.197069	1.08705	-2.52558	1.95789	-1.28995
ENSG00000260011.2	AC132938.2	0.173684	0.0246664	0.00390518	8.62938	-2.52546	0.875157	-2.88572
ENSG00000227312.2	AL445686.1	0.174037	NA	0.212569	1.12583	-2.52253	2.02364	-1.24653
ENSG00000236866.5	AL157902.1	0.174098	NA	0.412219	0.66766	-2.52203	3.07567	-0.819995
ENSG00000234161.1	PABPC5-AS1	0.174106	NA	0.412232	0.64888	-2.52196	3.07567	-0.819973
ENSG00000263311.1	AC009127.2	0.174106	NA	0.412232	0.64888	-2.52196	3.07567	-0.819973
ENSG00000251203.1	AC011726.1	0.174204	NA	0.412386	0.663357	-2.52115	3.0757	-0.819702
ENSG00000287821.1	AP000944.6	0.174229	NA	0.306684	0.654267	-2.52094	2.46618	-1.02221
ENSG00000277984.1	AP001264.1	0.174229	NA	0.306684	0.654267	-2.52094	2.46618	-1.02221
ENSG00000286167.1	AC105402.1	0.174432	NA	0.412746	0.655362	-2.51926	3.07576	-0.81907
ENSG00000170298.15	LGALS9B	0.174767	NA	0.413274	0.661844	-2.51649	3.07585	-0.818145
ENSG00000199883.1	RN7SKP90	0.175005	NA	0.413649	0.678653	-2.51453	3.07592	-0.817488
ENSG00000240704.1	KLF7P1	0.175063	NA	0.315409	0.646369	-2.51406	2.5042	-1.00394
ENSG00000277661.4	AL662791.2	0.175095	NA	0.343897	0.682356	-2.51379	2.6559	-0.946494
ENSG00000255503.1	AP001767.3	0.175216	0.2113	0.0701581	5.12276	-2.51279	1.3876	-1.81089
ENSG00000238065.1	LRRC57P1	0.175237	NA	0.333669	0.6721	-2.51262	2.59904	-0.96675
ENSG00000258830.1	AC137834.1	0.175303	0.401261	0.184225	3.31822	-2.51208	1.89182	-1.32786
ENSG00000235742.1	AC012308.1	0.175452	NA	0.128807	1.18279	-2.51085	1.65315	-1.51882
ENSG00000286498.1	AL132982.1	0.175474	NA	0.414386	0.643266	-2.51067	3.07605	-0.8162
ENSG00000241084.1	AL161785.3	0.175474	NA	0.414386	0.643266	-2.51067	3.07605	-0.8162
ENSG00000223458.2	LMO7DN-IT1	0.175474	NA	0.414386	0.643266	-2.51067	3.07605	-0.8162
ENSG00000275506.1	H3P25	0.175582	NA	0.0229577	2.57949	-2.50979	1.10362	-2.27414
ENSG00000229326.3	RPL17P15	0.175697	NA	0.414735	0.645176	-2.50884	3.07611	-0.815589
ENSG00000251939.1	RNU6-1278P	0.176167	NA	0.125216	1.11244	-2.50498	1.63378	-1.53324
ENSG00000178602.8	OTOS	0.176333	0.00800305	0.000921806	22.9045	-2.50362	0.755614	-3.31336
ENSG00000285237.1	AC104964.5	0.176484	NA	0.239265	0.67686	-2.50239	2.12639	-1.17682
ENSG00000287481.1	AL161663.1	0.17657	NA	0.416103	0.629631	-2.50169	3.07635	-0.8132
ENSG00000260740.2	AC026471.3	0.176795	NA	0.416455	0.678403	-2.49985	3.07641	-0.812587
ENSG00000233963.2	ATP8A2P3	0.176934	NA	0.194203	1.09778	-2.49871	1.92469	-1.29824
ENSG00000286962.1	AC027128.1	0.177117	NA	0.416959	0.661665	-2.49722	3.0765	-0.811708
ENSG00000287455.1	AC092793.1	0.177117	NA	0.416959	0.661665	-2.49722	3.0765	-0.811708
ENSG00000273982.1	AC005746.3	0.177141	NA	0.323536	0.65814	-2.49703	2.52936	-0.987218
ENSG00000125618.17	PAX8	0.177373	3.92329e-07	5.83302e-09	135.226	-2.49514	0.42861	-5.82148
ENSG00000197254.4	AP000445.1	0.177679	NA	0.417836	0.649076	-2.49265	3.07666	-0.810181
ENSG00000176256.10	HMGB4	0.177682	NA	0.317987	0.644531	-2.49263	2.49612	-0.998602
ENSG00000237410.1	NRXN2-AS1	0.177808	0.0933301	0.0223497	6.79519	-2.4916	1.09072	-2.28437
ENSG00000226338.1	AC079150.1	0.178186	NA	0.163047	1.06432	-2.48855	1.78403	-1.3949
ENSG00000230999.1	MTND5P8	0.178606	NA	0.419278	0.664373	-2.48515	3.07692	-0.807675
ENSG00000236564.1	YWHAQP5	0.178606	NA	0.419278	0.664373	-2.48515	3.07692	-0.807675
ENSG00000277684.1	AL392048.1	0.178606	NA	0.419278	0.664373	-2.48515	3.07692	-0.807675
ENSG00000143006.7	DMRTB1	0.178769	NA	0.41953	0.624414	-2.48384	3.07696	-0.807236
ENSG00000271907.1	SNORA35B	0.178983	NA	0.262314	0.666245	-2.48211	2.21431	-1.12094
ENSG00000175841.8	FAM172BP	0.179058	NA	0.172892	2.09024	-2.4815	1.82066	-1.36297
ENSG00000224299.1	MTATP6P16	0.179123	NA	0.353075	0.656724	-2.48098	2.67162	-0.928642
ENSG00000242968.1	AC096992.1	0.179161	NA	0.420139	0.630896	-2.48068	3.07707	-0.806181
ENSG00000254298.1	AC008641.1	0.179295	NA	0.330328	0.647634	-2.47959	2.54721	-0.973453
ENSG00000259611.2	LINC01582	0.179328	NA	0.320081	0.634131	-2.47933	2.49356	-0.994291
ENSG00000287439.1	AC092078.3	0.179737	NA	0.182822	1.56889	-2.47604	1.85873	-1.33212
ENSG00000225254.2	ARMC8P1	0.179908	NA	0.350882	0.647525	-2.47467	2.65272	-0.93288
ENSG00000235615.2	AJ239322.1	0.17994	NA	0.185877	2.12	-2.47441	1.87048	-1.32287
ENSG00000279834.1	AC068870.3	0.180395	NA	0.200384	1.11689	-2.47077	1.92959	-1.28046
ENSG00000151475.6	SLC25A31	0.180499	NA	0.0867971	2.76498	-2.46994	1.44227	-1.71254
ENSG00000249977.1	AC106748.1	0.180548	NA	0.350584	0.654116	-2.46955	2.64559	-0.933458
ENSG00000270531.1	AC022001.1	0.180613	NA	0.144781	1.65188	-2.46902	1.69318	-1.45822
ENSG00000286854.1	AC079382.2	0.180977	NA	0.422946	0.620737	-2.46612	3.07757	-0.80132
ENSG00000229664.1	AL137186.1	0.180977	NA	0.422946	0.620737	-2.46612	3.07757	-0.80132
ENSG00000283361.2	CFAP97D2	0.181074	0.376756	0.167033	3.21334	-2.46535	1.78416	-1.3818
ENSG00000225110.3	PNMA6F	0.181249	0.0058918	0.000627938	27.6403	-2.46396	0.720614	-3.41925
ENSG00000184254.17	ALDH1A3	0.182449	2.6144e-13	4.03008e-16	1305.64	-2.45444	0.301615	-8.13765
ENSG00000287316.1	AC007391.3	0.182744	NA	0.425661	0.626943	-2.45211	3.07806	-0.796639
ENSG00000250803.6	AC010255.3	0.182744	NA	0.425661	0.626943	-2.45211	3.07806	-0.796639
ENSG00000236886.2	AC007563.2	0.182871	NA	0.100525	1.73203	-2.4511	1.49247	-1.64231
ENSG00000250846.6	EPHA5-AS1	0.182981	0.000577021	3.52894e-05	32.8991	-2.45023	0.592367	-4.13634
ENSG00000230613.1	HM13-AS1	0.183116	NA	NA	0.593467	-2.44917	3.07817	-0.79566
ENSG00000256923.1	AC084819.1	0.183237	0.00644343	0.000703892	7.58734	-2.44822	0.722603	-3.38806
ENSG00000132975.8	GPR12	0.18442	1.66565e-06	3.23038e-08	109.562	-2.43893	0.441158	-5.52847
ENSG00000234969.1	AL627389.1	0.184724	0.376201	0.16661	25.757	-2.43656	1.76156	-1.38318
ENSG00000287848.1	AL355303.2	0.184875	NA	0.428913	0.629541	-2.43538	3.07865	-0.791054
ENSG00000253821.2	AC090796.1	0.184875	NA	0.428913	0.629541	-2.43538	3.07865	-0.791054
ENSG00000271584.2	LINC02550	0.18502	NA	0.196644	1.53962	-2.43425	1.8853	-1.29117
ENSG00000255580.1	AP000462.1	0.185031	NA	0.42915	0.619394	-2.43416	3.07869	-0.790647
ENSG00000226917.6	LINC01276	0.185299	NA	0.429558	0.620692	-2.43207	3.07877	-0.789949
ENSG00000270460.1	AC106900.1	0.18546	NA	0.0961333	1.65183	-2.43082	1.46092	-1.6639
ENSG00000275350.1	AL513479.1	0.185484	NA	0.340854	0.639907	-2.43063	2.5519	-0.952479
ENSG00000233455.2	AL035414.1	0.185541	NA	0.244739	0.647275	-2.43019	2.08919	-1.16322
ENSG00000279147.1	AC112504.1	0.185561	NA	0.152857	1.08914	-2.43003	1.6999	-1.42951
ENSG00000285618.1	AC074132.1	0.185603	NA	0.10714	1.81696	-2.42971	1.50803	-1.61118
ENSG00000258943.1	AL049871.1	0.185611	NA	0.43003	0.620451	-2.42965	3.07886	-0.78914
ENSG00000197083.11	ZNF300P1	0.185658	0.200454	0.0648322	7.9391	-2.42928	1.31567	-1.84641
ENSG00000231655.1	EMP2P1	0.185716	NA	0.43019	0.611843	-2.42883	3.07888	-0.788867
ENSG00000134160.14	TRPM1	0.185881	2.19119e-05	6.90466e-07	38.0489	-2.42755	0.489028	-4.96403
ENSG00000232362.1	ATP5MGP2	0.186549	NA	0.128114	1.09154	-2.42237	1.59201	-1.52158
ENSG00000251557.2	HNRNPKP3	0.186679	0.171619	0.0519378	4.47927	-2.42137	1.24578	-1.94365
ENSG00000165078.13	CPA6	0.186949	NA	0.432056	0.627139	-2.41928	3.07923	-0.785679
ENSG00000287723.1	AP005901.6	0.187046	NA	0.331876	0.602082	-2.41854	2.49246	-0.970341
ENSG00000249541.1	AC116359.1	0.187349	NA	0.151787	1.02476	-2.4162	1.68582	-1.43325
ENSG00000260762.1	ACSM5P1	0.187599	NA	0.433035	0.634788	-2.41428	3.0794	-0.784008
ENSG00000250939.2	AC034198.1	0.187667	NA	0.283222	0.640892	-2.41375	2.2493	-1.07311
ENSG00000278128.2	AL139093.1	0.187856	NA	0.153988	0.997617	-2.4123	1.69215	-1.42559
ENSG00000151418.12	ATP6V1G3	0.188272	NA	0.434049	0.642436	-2.40911	3.07959	-0.782281
ENSG00000227406.1	RNF6P1	0.188272	NA	0.434049	0.642436	-2.40911	3.07959	-0.782281
ENSG00000254587.2	AP003066.1	0.188272	NA	0.434049	0.642436	-2.40911	3.07959	-0.782281
ENSG00000115607.9	IL18RAP	0.188272	NA	0.434049	0.642436	-2.40911	3.07959	-0.782281
ENSG00000227017.1	AC007036.1	0.188272	NA	0.434049	0.642436	-2.40911	3.07959	-0.782281
ENSG00000213287.3	AP001102.1	0.188272	NA	0.434049	0.642436	-2.40911	3.07959	-0.782281
ENSG00000250488.2	LINC02233	0.188272	NA	0.434049	0.642436	-2.40911	3.07959	-0.782281
ENSG00000249028.2	AC004672.1	0.188272	NA	0.434049	0.642436	-2.40911	3.07959	-0.782281
ENSG00000145649.8	GZMA	0.188272	NA	0.434049	0.642436	-2.40911	3.07959	-0.782281
ENSG00000287842.1	AL161714.1	0.188377	NA	0.343467	0.622594	-2.40831	2.54219	-0.947337
ENSG00000261796.1	ISY1-RAB43	0.188385	0.648246	0.404123	267.965	-2.40825	2.88661	-0.834281
ENSG00000165643.11	SOHLH1	0.188407	NA	0.434252	0.608959	-2.40807	3.07963	-0.781936
ENSG00000248211.1	TRPC7-AS1	0.188528	NA	NA	0.575483	-2.40715	3.07966	-0.781627
ENSG00000244756.1	AL049874.2	0.188949	NA	0.245146	0.615476	-2.40393	2.0684	-1.16222
ENSG00000262039.1	AC091180.6	0.189024	NA	0.125403	1.7194	-2.40336	1.56828	-1.53248
ENSG00000229453.2	SPINK8	0.18913	0.0432905	0.00804355	4.62397	-2.40255	0.906541	-2.65024
ENSG00000185477.5	GPRIN3	0.189475	6.11938e-15	5.4843e-18	1200.79	-2.39992	0.277678	-8.64282
ENSG00000218730.1	AL117342.1	0.189746	NA	0.359609	0.617412	-2.39786	2.61744	-0.91611
ENSG00000287046.1	AC092810.4	0.190245	NA	0.437005	0.594928	-2.39407	3.08014	-0.777261
ENSG00000269553.1	U62631.1	0.19031	NA	0.266378	1.04437	-2.39357	2.15357	-1.11144
ENSG00000282306.1	AC073488.7	0.190377	NA	0.0797731	1.61929	-2.39307	1.3659	-1.752
ENSG00000225140.1	AL358216.1	0.190501	NA	0.305712	1.63726	-2.39213	2.33547	-1.02426
ENSG00000145242.13	EPHA5	0.190631	1.50759e-06	2.82656e-08	900.581	-2.39115	0.430694	-5.55185
ENSG00000225187.1	AC073283.1	0.190737	NA	0.255204	0.624746	-2.39034	2.10085	-1.1378
ENSG00000228825.1	LAMTOR3P1	0.19077	NA	0.437789	0.613709	-2.39009	3.08028	-0.775933
ENSG00000255432.1	AP001458.2	0.190856	NA	0.437916	0.60141	-2.38945	3.0803	-0.775717
ENSG00000228208.7	LINC02869	0.191502	NA	0.438878	0.602467	-2.38457	3.08048	-0.774089
ENSG00000255475.1	AP001007.2	0.191502	NA	0.438878	0.602467	-2.38457	3.08048	-0.774089
ENSG00000287671.1	AC068418.3	0.19157	NA	0.198394	1.46688	-2.38406	1.85366	-1.28614
ENSG00000254727.1	PTP4A1P6	0.191749	NA	0.264879	0.629291	-2.38271	2.13709	-1.11493
ENSG00000225385.3	AL353572.1	0.192241	NA	0.439976	0.584769	-2.37901	3.08069	-0.772234
ENSG00000274898.1	AC001226.1	0.192401	NA	0.121249	2.55378	-2.37781	1.53451	-1.54955
ENSG00000286807.1	AC093639.2	0.192537	0.261193	0.0955434	3.21975	-2.37679	1.42592	-1.66685
ENSG00000225039.1	LINC01058	0.192586	NA	0.440487	0.580224	-2.37643	3.08078	-0.771371
ENSG00000264116.6	AC116003.1	0.192928	NA	0.440994	0.575679	-2.37386	3.08088	-0.770516
ENSG00000287550.1	AL450345.2	0.193045	0.00177655	0.000141767	18.3485	-2.37299	0.623639	-3.80506
ENSG00000102678.7	FGF9	0.19333	7.4478e-11	2.74028e-13	1646.25	-2.37086	0.324483	-7.30658
ENSG00000253746.1	AC091182.2	0.193617	0.0114565	0.00144608	14.4115	-2.36872	0.743644	-3.18529
ENSG00000231892.1	AC073316.2	0.194042	NA	0.187131	2.46987	-2.36556	1.7933	-1.31911
ENSG00000070182.21	SPTB	0.19415	1.74577e-11	4.69377e-14	354.911	-2.36475	0.313621	-7.54017
ENSG00000188694.6	KRTAP24-1	0.194193	NA	0.195785	2.85803	-2.36444	1.82772	-1.29365
ENSG00000254044.5	AC034154.1	0.194295	NA	0.228532	1.04197	-2.36368	1.96295	-1.20415
ENSG00000287987.1	AL390839.2	0.194541	NA	0.21915	1.98137	-2.36185	1.92209	-1.22879
ENSG00000257880.1	AC078789.1	0.194549	NA	0.443387	0.607714	-2.36179	3.08132	-0.766487
ENSG00000221332.2	AL445465.1	0.194644	NA	0.360045	0.604611	-2.36109	2.57964	-0.915278
ENSG00000223784.2	LINP1	0.194666	9.83271e-06	2.69302e-07	110.791	-2.36092	0.458989	-5.14375
ENSG00000270178.1	AC007687.1	0.194785	NA	0.0507133	2.32562	-2.36004	1.20786	-1.9539
ENSG00000225807.2	AC069281.1	0.195093	NA	0.195507	2.50356	-2.35776	1.82143	-1.29446
ENSG00000137080.4	IFNA21	0.195263	NA	0.0874801	1.52166	-2.35651	1.37901	-1.70884
ENSG00000265684.2	RN7SL378P	0.195286	NA	0.367068	0.613459	-2.35634	2.61242	-0.901979
ENSG00000233932.6	CTXN2	0.195286	0.00771036	0.00087842	21.6972	-2.35634	0.708285	-3.32682
ENSG00000276690.1	AC117415.1	0.195463	0.0260681	0.00418005	12.3304	-2.35503	0.822217	-2.86424
ENSG00000266830.1	AC061975.6	0.195798	NA	0.159444	1.52532	-2.35256	1.67211	-1.40694
ENSG00000273669.1	AC015819.1	0.195809	0.211029	0.070044	3.6594	-2.35248	1.29855	-1.81163
ENSG00000204659.5	CBY3	0.195999	NA	0.205142	1.64537	-2.35108	1.85558	-1.26704
ENSG00000232716.2	AC016831.3	0.196044	NA	0.392867	0.618956	-2.35075	2.75125	-0.85443
ENSG00000224819.2	AC093843.1	0.196147	0.170826	0.0515875	3.24517	-2.34999	1.20725	-1.94656
ENSG00000228221.6	LINC00578	0.196648	0.00856231	0.00100525	18.187	-2.34631	0.71337	-3.28905
ENSG00000226548.1	AC016722.1	0.197081	NA	0.447099	0.583426	-2.34314	3.08202	-0.76026
ENSG00000285006.1	AC005280.3	0.19712	NA	0.447156	0.595725	-2.34285	3.08203	-0.760165
ENSG00000239744.3	RN7SL63P	0.19712	NA	0.447156	0.595725	-2.34285	3.08203	-0.760165
ENSG00000234754.2	LINC02817	0.19712	NA	0.447156	0.595725	-2.34285	3.08203	-0.760165
ENSG00000176988.9	FMR1NB	0.19712	NA	0.447156	0.595725	-2.34285	3.08203	-0.760165
ENSG00000231858.5	AC067945.2	0.19712	NA	0.447156	0.595725	-2.34285	3.08203	-0.760165
ENSG00000114349.10	GNAT1	0.197384	0.29582	0.115432	3.92251	-2.34092	1.48702	-1.57424
ENSG00000171570.11	RAB4B-EGLN2	0.197394	0.481102	0.244492	270.123	-2.34085	2.01133	-1.16383
ENSG00000180772.7	AGTR2	0.197452	NA	0.44764	0.586876	-2.34043	3.08212	-0.759356
ENSG00000255347.1	AC021820.1	0.1975	NA	0.370855	0.580179	-2.34008	2.61498	-0.894872
ENSG00000226186.1	ELOCP21	0.197599	NA	0.174505	1.02874	-2.33935	1.72281	-1.35787
ENSG00000174898.16	CATSPERD	0.197804	NA	0.448153	0.584483	-2.33786	3.08222	-0.758498
ENSG00000235021.1	AL591848.2	0.197804	NA	0.448153	0.584483	-2.33786	3.08222	-0.758498
ENSG00000287305.1	AC010969.3	0.197804	NA	0.448153	0.584483	-2.33786	3.08222	-0.758498
ENSG00000204544.5	MUC21	0.197985	0.302621	0.119367	4.19157	-2.33654	1.50025	-1.55744
ENSG00000274321.1	AC093578.2	0.198073	NA	0.372183	0.603939	-2.33589	2.61757	-0.892392
ENSG00000267408.1	AC011498.5	0.198073	NA	0.372183	0.603939	-2.33589	2.61757	-0.892392
ENSG00000286333.1	AC004828.2	0.198145	NA	0.383798	0.589028	-2.33537	2.6815	-0.87092
ENSG00000181585.7	TMIE	0.198162	0.00851186	0.00099628	37.1655	-2.33524	0.709461	-3.29158
ENSG00000248109.3	MARCOL	0.198362	NA	0.364104	0.569889	-2.33379	2.57147	-0.907573
ENSG00000107859.10	PITX3	0.198437	NA	0.449075	0.566785	-2.33324	3.0824	-0.756958
ENSG00000260918.1	AC107398.3	0.198511	3.03157e-06	6.55329e-08	164.86	-2.33271	0.431743	-5.40301
ENSG00000279104.1	AC093775.1	0.198718	NA	0.137983	1.47184	-2.3312	1.57159	-1.48334
ENSG00000213049.3	HNRNPA1P34	0.198768	NA	0.449555	0.56224	-2.33084	3.08249	-0.756156
ENSG00000257870.1	AC027287.2	0.198768	NA	0.449555	0.56224	-2.33084	3.08249	-0.756156
ENSG00000287095.1	AF228727.1	0.199096	NA	0.450031	0.557695	-2.32846	3.08258	-0.755363
ENSG00000257434.1	AC073525.1	0.199421	NA	0.450502	0.55315	-2.32611	3.08267	-0.754578
ENSG00000170890.14	PLA2G1B	0.199742	NA	0.450967	0.548605	-2.32379	3.08275	-0.753803
ENSG00000239468.3	RN7SL569P	0.199859	NA	0.124036	1.55822	-2.32295	1.51032	-1.53805
ENSG00000188280.11	FAM230G	0.20003	NA	0.378606	0.589979	-2.32171	2.6369	-0.880468
ENSG00000287400.1	AC093151.7	0.200081	NA	0.451458	0.586205	-2.32134	3.08285	-0.752986
ENSG00000206113.11	CFAP99	0.200497	NA	0.216334	2.42301	-2.31835	1.87518	-1.23633
ENSG00000230789.1	ARHGAP26-IT1	0.200547	NA	0.452131	0.600972	-2.31799	3.08298	-0.751866
ENSG00000168081.9	PNOC	0.200783	0.0219353	0.00335616	18.4898	-2.31629	0.789713	-2.93308
ENSG00000282668.1	AC073488.10	0.200891	NA	0.36825	0.574963	-2.31551	2.57349	-0.899755
ENSG00000243967.4	NBPF5P	0.200921	NA	0.45267	0.572992	-2.3153	3.08308	-0.750971
ENSG00000234117.2	AL445224.1	0.200921	NA	0.45267	0.572992	-2.3153	3.08308	-0.750971
ENSG00000229373.9	LINC00452	0.201082	NA	0.0673972	2.63147	-2.31414	1.26524	-1.82902
ENSG00000171136.7	RLN3	0.20121	NA	0.367104	0.582082	-2.31322	2.5648	-0.901912
ENSG00000253813.1	COX6B1P4	0.20121	NA	0.367104	0.582082	-2.31322	2.5648	-0.901912
ENSG00000234423.2	LINC01250	0.201216	NA	0.453095	0.58973	-2.31319	3.08316	-0.750264
ENSG00000286728.1	AC009236.2	0.201445	NA	0.117048	3.0828	-2.31154	1.47487	-1.56729
ENSG00000276454.1	AC008083.4	0.201593	NA	0.453639	0.581445	-2.31048	3.08326	-0.749363
ENSG00000261257.1	AP000821.1	0.201593	NA	0.453639	0.581445	-2.31048	3.08326	-0.749363
ENSG00000242559.3	RN7SL144P	0.201593	NA	0.453639	0.581445	-2.31048	3.08326	-0.749363
ENSG00000223786.1	AL357507.1	0.201803	NA	0.0637058	2.81811	-2.30898	1.24525	-1.85423
ENSG00000232830.5	AC110994.2	0.201848	NA	0.133616	1.04745	-2.30866	1.53911	-1.5
ENSG00000240108.1	NCOR1P1	0.201882	NA	0.454054	0.572596	-2.30842	3.08334	-0.748673
ENSG00000287498.1	AC007749.2	0.201882	NA	0.454054	0.572596	-2.30842	3.08334	-0.748673
ENSG00000241859.7	ANOS2P	0.20196	NA	0.37044	0.568051	-2.30786	2.57675	-0.895649
ENSG00000250333.2	AC093725.2	0.20196	NA	0.37044	0.568051	-2.30786	2.57675	-0.895649
ENSG00000236790.6	LINC00299	0.202335	0.426617	0.202213	3.54421	-2.30518	1.8076	-1.27527
ENSG00000182103.5	FAM181B	0.202461	1.44777e-08	1.32866e-10	217.206	-2.30428	0.358707	-6.42385
ENSG00000102048.16	ASB9	0.202688	0.00210083	0.000174197	26.9943	-2.30266	0.613428	-3.75377
ENSG00000286982.1	AC016931.1	0.202851	NA	0.379529	0.579473	-2.30151	2.61903	-0.878764
ENSG00000205126.2	ACCSL	0.20286	NA	0.455459	0.558961	-2.30144	3.08361	-0.746345
ENSG00000197057.9	DTHD1	0.202902	0.158778	0.0464295	13.7216	-2.30114	1.1555	-1.99147
ENSG00000204021.4	LIPK	0.202995	NA	0.205298	0.578522	-2.30049	1.81627	-1.2666
ENSG00000188056.12	TREML4	0.203016	NA	0.2226	2.43955	-2.30033	1.88607	-1.21964
ENSG00000237853.6	NFIA-AS1	0.203126	NA	0.455839	0.576685	-2.29956	3.08369	-0.745717
ENSG00000286377.1	AC114964.2	0.203526	NA	0.105415	2.02794	-2.29672	1.41847	-1.61915
ENSG00000187773.8	DIPK1C	0.204276	7.52252e-05	3.00685e-06	50.2662	-2.29141	0.490628	-4.67035
ENSG00000213452.4	AKR1B1P2	0.204657	NA	0.183859	0.939203	-2.28872	1.72218	-1.32897
ENSG00000227170.1	AF178030.1	0.20468	NA	0.458059	0.571924	-2.28856	3.08411	-0.742047
ENSG00000254261.1	AL451137.2	0.20468	NA	0.458059	0.571924	-2.28856	3.08411	-0.742047
ENSG00000231138.1	AC009987.1	0.20468	NA	0.458059	0.571924	-2.28856	3.08411	-0.742047
ENSG00000215297.3	AL354941.1	0.20468	NA	0.458059	0.571924	-2.28856	3.08411	-0.742047
ENSG00000267726.1	LINC02565	0.20468	NA	0.458059	0.571924	-2.28856	3.08411	-0.742047
ENSG00000258587.1	AC006530.1	0.204727	NA	0.380063	0.564347	-2.28822	2.60683	-0.87778
ENSG00000255508.7	AP002990.1	0.204845	0.16575	0.049431	5614.26	-2.2874	1.16416	-1.96486
ENSG00000267131.1	AC005746.2	0.204969	NA	0.118746	1.61463	-2.28653	1.46567	-1.56006
ENSG00000230646.1	KLF2P2	0.205033	0.0670158	0.0143641	10.7464	-2.28607	0.933843	-2.44803
ENSG00000224269.1	AP000697.1	0.205064	NA	0.458606	0.548802	-2.28585	3.08422	-0.741145
ENSG00000255689.1	AP003174.1	0.205375	NA	0.459048	0.544257	-2.28367	3.08431	-0.740415
ENSG00000231982.1	AC112907.2	0.205568	NA	0.223742	2.2943	-2.28231	1.87592	-1.21664
ENSG00000256618.2	MTRNR2L1	0.206096	NA	0.0819985	1.48415	-2.27861	1.31015	-1.73921
ENSG00000185774.16	KCNIP4	0.206118	1.41325e-07	1.78841e-09	214.604	-2.27846	0.378737	-6.01594
ENSG00000228076.2	AL591719.1	0.206273	NA	0.0622715	2.209	-2.27737	1.22153	-1.86436
ENSG00000228156.1	AL133343.1	0.206346	NA	0.383852	0.53904	-2.27686	2.61462	-0.87082
ENSG00000240963.1	AL645465.1	0.206525	0.158536	0.0463238	5.62884	-2.27561	1.14213	-1.99243
ENSG00000272617.3	AC026464.6	0.206885	NA	NA	0.521531	-2.2731	3.08472	-0.73689
ENSG00000251877.1	RNU2-45P	0.207119	NA	0.395575	0.571995	-2.27147	2.67372	-0.849551
ENSG00000255028.5	AP003049.2	0.207347	NA	0.254679	1.60868	-2.26988	1.99277	-1.13906
ENSG00000246225.7	AC006299.1	0.207403	0.439135	0.211374	4.05341	-2.26949	1.81589	-1.2498
ENSG00000183117.19	CSMD1	0.207635	3.60308e-08	3.74581e-10	301.263	-2.26788	0.362034	-6.26427
ENSG00000237327.1	UPP2-IT1	0.207736	NA	0.132352	1.46803	-2.26718	1.50654	-1.50489
ENSG00000285612.1	AC004974.1	0.207885	NA	0.322052	1.79785	-2.26614	2.28846	-0.990249
ENSG00000223528.7	AL359094.1	0.208063	NA	0.224246	1.5826	-2.26491	1.86364	-1.21532
ENSG00000186474.15	KLK12	0.208064	0.299654	0.11765	6.83262	-2.2649	1.44749	-1.56472
ENSG00000272139.1	AC113349.2	0.2081	NA	0.0926837	1.59289	-2.26465	1.34688	-1.68141
ENSG00000178403.4	NEUROG2	0.208306	0.0316532	0.00535931	45.1398	-2.26322	0.812763	-2.7846
ENSG00000205786.8	LINC01531	0.2084	NA	0.463328	0.571746	-2.26257	3.08514	-0.733378
ENSG00000250971.3	AC110772.2	0.2084	NA	0.463328	0.571746	-2.26257	3.08514	-0.733378
ENSG00000229196.4	AC087071.1	0.208555	NA	0.246772	1.6269	-2.2615	1.95255	-1.15823
ENSG00000151615.3	POU4F2	0.208798	0.0697497	0.0151902	8.16405	-2.25982	0.930805	-2.42781
ENSG00000234311.1	AL451069.3	0.208894	NA	0.0546579	3.05401	-2.25916	1.17567	-1.92159
ENSG00000231322.5	RPL13AP17	0.20921	NA	0.388331	0.550067	-2.25697	2.61633	-0.862648
ENSG00000255496.1	AC103796.1	0.20921	NA	0.388331	0.550067	-2.25697	2.61633	-0.862648
ENSG00000234155.1	LINC02535	0.209251	NA	0.346298	1.62295	-2.2567	2.39617	-0.941794
ENSG00000257507.1	LINC02373	0.209886	NA	0.134268	3.0044	-2.25232	1.50407	-1.49748
ENSG00000245482.2	AC046130.2	0.209983	NA	0.249561	2.40186	-2.25166	1.95555	-1.15142
ENSG00000287116.1	AC104335.3	0.210406	0.199225	0.0642849	3.6591	-2.24875	1.21541	-1.8502
ENSG00000176289.4	IDSP1	0.21052	NA	0.126006	2.99221	-2.24797	1.46922	-1.53004
ENSG00000262943.7	ALOX12P2	0.210739	6.29897e-06	1.54003e-07	64.6513	-2.24647	0.428086	-5.24771
ENSG00000225421.2	AC019330.1	0.210922	NA	0.466864	0.547459	-2.24522	3.08583	-0.72759
ENSG00000225639.1	PGAM1P2	0.210936	NA	0.176491	1.03741	-2.24513	1.66104	-1.35164
ENSG00000165182.11	CXorf58	0.211001	0.289511	0.11158	5.73541	-2.24468	1.41074	-1.59113
ENSG00000226017.2	PRICKLE2-AS3	0.211024	NA	0.186726	1.0165	-2.24452	1.69998	-1.32033
ENSG00000240520.6	UOX	0.211104	0.324335	0.132483	6.77282	-2.24397	1.49163	-1.50438
ENSG00000218359.1	SUMO2P13	0.211151	NA	0.419006	0.552004	-2.24365	2.7763	-0.808146
ENSG00000213917.2	RPL5P8	0.211384	NA	0.387551	0.539667	-2.24206	2.59478	-0.864068
ENSG00000286487.1	AC006398.1	0.211466	NA	0.35905	1.57843	-2.24151	2.44392	-0.917176
ENSG00000285848.1	AC025280.3	0.211712	NA	0.467966	0.544212	-2.23983	3.08605	-0.725792
ENSG00000251478.1	AC008817.1	0.211712	NA	0.467966	0.544212	-2.23983	3.08605	-0.725792
ENSG00000248400.2	ST13P12	0.211712	NA	0.467966	0.544212	-2.23983	3.08605	-0.725792
ENSG00000131808.10	FSHB	0.211835	NA	0.468138	0.548515	-2.23899	3.08608	-0.725513
ENSG00000256982.2	AC135782.1	0.211835	NA	0.468138	0.548515	-2.23899	3.08608	-0.725513
ENSG00000258474.1	LINC02313	0.211882	NA	0.468204	0.535363	-2.23867	3.08609	-0.725405
ENSG00000239498.1	AC019211.1	0.211882	NA	0.468204	0.535363	-2.23867	3.08609	-0.725405
ENSG00000287647.1	AC093575.1	0.211882	NA	0.468204	0.535363	-2.23867	3.08609	-0.725405
ENSG00000249599.2	BMPR1B-DT	0.212036	NA	0.216488	2.86021	-2.23762	1.81049	-1.23592
ENSG00000252147.1	RNY3P16	0.212057	NA	0.0965172	1.46351	-2.23748	1.34627	-1.66198
ENSG00000261097.1	LINC00563	0.21217	NA	0.468604	0.530818	-2.23671	3.08617	-0.724752
ENSG00000273118.1	AC093865.1	0.212536	NA	0.386742	0.992488	-2.23422	2.5813	-0.865541
ENSG00000156076.10	WIF1	0.212906	0.00586673	0.000623794	62.1104	-2.23171	0.652347	-3.42105
ENSG00000287105.1	AC090577.1	0.213149	NA	0.469964	0.543011	-2.23007	3.08644	-0.722537
ENSG00000243762.1	AC006547.2	0.21335	NA	0.315988	0.992239	-2.22871	2.22263	-1.00274
ENSG00000261480.1	GOLGA8M	0.21371	NA	0.181158	0.924322	-2.22627	1.66488	-1.3372
ENSG00000264373.1	AC005899.3	0.213729	NA	0.223591	0.978342	-2.22614	1.82916	-1.21703
ENSG00000259538.1	UBE2Q2P11	0.213829	NA	NA	0.503548	-2.22547	3.08663	-0.721004
ENSG00000086506.3	HBQ1	0.214002	0.325302	0.133083	3.92671	-2.22431	1.48084	-1.50206
ENSG00000237308.1	AC009237.10	0.214152	NA	0.421308	0.55186	-2.22329	2.76476	-0.804153
ENSG00000206962.1	RNU6-74P	0.214334	NA	0.471606	0.559508	-2.22207	3.08677	-0.719868
ENSG00000164500.7	SPATA48	0.214334	NA	0.471606	0.559508	-2.22207	3.08677	-0.719868
ENSG00000271625.1	PSMA6P4	0.214478	NA	0.471805	0.550659	-2.2211	3.08681	-0.719545
ENSG00000253363.7	AC090809.1	0.214478	NA	0.471805	0.550659	-2.2211	3.08681	-0.719545
ENSG00000250645.1	AC010442.3	0.214503	NA	0.393299	0.530146	-2.22093	2.60169	-0.85365
ENSG00000234187.1	AIMP1P1	0.215049	NA	0.375664	0.916363	-2.21726	2.5028	-0.885913
ENSG00000249352.4	LINC02198	0.215191	NA	0.24732	1.56404	-2.21631	1.91576	-1.15688
ENSG00000220267.1	ACTBP8	0.215319	NA	0.313313	0.545163	-2.21545	2.19723	-1.00829
ENSG00000285743.1	AL158210.1	0.215454	NA	0.282964	1.40016	-2.21455	2.06257	-1.07368
ENSG00000230536.1	AL360268.1	0.215744	NA	0.402483	0.541569	-2.21261	2.64288	-0.837195
ENSG00000257253.2	AC131157.1	0.215804	NA	0.400849	0.538995	-2.2122	2.63325	-0.840105
ENSG00000244456.2	SPECC1P2	0.215872	NA	0.473727	0.558307	-2.21175	3.08719	-0.716428
ENSG00000101977.21	MCF2	0.215899	0.000441045	2.56611e-05	92.4893	-2.21157	0.525451	-4.20891
ENSG00000224762.1	CR769776.1	0.216009	NA	0.310143	0.53801	-2.21084	2.17834	-1.01492
ENSG00000227408.1	AMYP1	0.216049	0.290832	0.112381	3.96637	-2.21057	1.39242	-1.58758
ENSG00000275126.2	H4C13	0.216132	NA	0.474084	0.516511	-2.21001	3.08726	-0.71585
ENSG00000251643.1	AC093763.2	0.216162	NA	0.474124	0.553762	-2.20982	3.08727	-0.715784
ENSG00000225840.2	AC010970.1	0.216162	NA	0.474124	0.553762	-2.20982	3.08727	-0.715784
ENSG00000257953.1	AC083805.2	0.216314	0.195689	0.0625756	3.27859	-2.2088	1.18613	-1.8622
ENSG00000185176.13	AQP12B	0.216804	NA	0.0451531	2.69329	-2.20553	1.10099	-2.00323
ENSG00000259499.1	AC090519.2	0.217024	NA	0.244883	2.28254	-2.20408	1.89538	-1.16287
ENSG00000171916.17	LGALS9C	0.217364	NA	0.475774	0.522993	-2.20182	3.0876	-0.713117
ENSG00000264693.1	AC123786.1	0.217587	NA	0.229476	1.76721	-2.20034	1.83101	-1.20171
ENSG00000182348.7	ZNF804B	0.217627	0.00345616	0.000323624	64.6233	-2.20007	0.611876	-3.59562
ENSG00000232373.2	MTCYBP3	0.217877	NA	0.476476	0.549988	-2.19841	3.08774	-0.711982
ENSG00000236345.1	SCAT8	0.217946	0.00010724	4.61714e-06	65.3983	-2.19796	0.479749	-4.58147
ENSG00000233852.1	AC005304.1	0.218186	NA	0.220647	0.931558	-2.19637	1.79323	-1.22481
ENSG00000257259.3	LINC02388	0.218213	0.204667	0.0668478	5.58452	-2.19619	1.19834	-1.8327
ENSG00000227929.4	SRGAP3-AS3	0.218651	NA	0.477533	0.529475	-2.1933	3.08795	-0.710277
ENSG00000260979.1	AC022167.3	0.218651	NA	0.477533	0.529475	-2.1933	3.08795	-0.710277
ENSG00000251586.1	TET2-AS1	0.218651	NA	0.477533	0.529475	-2.1933	3.08795	-0.710277
ENSG00000250496.2	ABT1P1	0.218739	NA	0.272942	1.56774	-2.19272	2.00008	-1.09631
ENSG00000136918.7	WDR38	0.218798	NA	0.347921	1.72536	-2.19233	2.33567	-0.93863
ENSG00000234602.9	MCIDAS	0.218828	0.0672617	0.0144409	12.013	-2.19213	0.896173	-2.4461
ENSG00000228459.4	LINC01546	0.219082	0.101602	0.0250043	9.02224	-2.19046	0.9773	-2.24134
ENSG00000126778.12	SIX1	0.219242	8.41836e-06	2.2121e-07	2860.14	-2.18941	0.422619	-5.18057
ENSG00000222069.1	RN7SKP285	0.21936	NA	0.406325	0.521683	-2.18863	2.6357	-0.830378
ENSG00000228789.7	HCG22	0.219558	NA	0.102351	2.37508	-2.18732	1.33899	-1.63356
ENSG00000174957.1	OR5J2	0.219682	NA	0.478937	0.530532	-2.18651	3.08823	-0.708013
ENSG00000201894.1	RNU6-967P	0.219744	NA	0.423811	0.539731	-2.18611	2.73323	-0.799827
ENSG00000254006.5	AC104232.1	0.220061	NA	0.479451	0.508289	-2.18403	3.08834	-0.707185
ENSG00000241473.1	AC108734.2	0.220076	NA	0.42652	0.52838	-2.18392	2.74652	-0.79516
ENSG00000224697.1	NEFMP1	0.220076	NA	0.42652	0.52838	-2.18392	2.74652	-0.79516
ENSG00000248469.1	AC139491.1	0.220211	NA	0.0413432	3.07825	-2.18304	1.07008	-2.04007
ENSG00000264016.3	AC015908.3	0.220305	NA	0.479784	0.503744	-2.18242	3.0884	-0.706651
ENSG00000224382.2	LINC00703	0.220305	NA	0.479784	0.503744	-2.18242	3.0884	-0.706651
ENSG00000270775.1	AP000436.1	0.220305	NA	0.479784	0.503744	-2.18242	3.0884	-0.706651
ENSG00000275067.1	MIR6825	0.220413	NA	0.240268	0.542555	-2.18172	1.85786	-1.17432
ENSG00000265115.1	AC011824.1	0.220447	NA	0.25373	1.7648	-2.1815	1.91135	-1.14134
ENSG00000232480.1	TGFB2-AS1	0.220491	NA	0.168854	2.90683	-2.18121	1.5853	-1.3759
ENSG00000227189.2	AC092535.2	0.221082	NA	0.093516	3.0536	-2.17735	1.29825	-1.67714
ENSG00000273487.1	AC104836.1	0.221162	0.463643	0.230234	3.24408	-2.17682	1.81439	-1.19976
ENSG00000113805.8	CNTN3	0.221557	4.97509e-10	2.65743e-12	443.992	-2.17425	0.310841	-6.99474
ENSG00000005421.9	PON1	0.221722	NA	0.229196	2.20665	-2.17318	1.80732	-1.20243
ENSG00000258435.1	AC048337.1	0.222082	NA	0.404838	0.507617	-2.17083	2.60601	-0.833012
ENSG00000223308.1	RN7SKP101	0.222082	NA	0.404838	0.507617	-2.17083	2.60601	-0.833012
ENSG00000151715.8	TMEM45B	0.222255	5.71695e-06	1.37108e-07	79.26	-2.16971	0.411782	-5.26908
ENSG00000286394.1	AC117373.2	0.22228	NA	0.422783	0.525771	-2.16955	2.70651	-0.801603
ENSG00000286074.1	AC110795.1	0.222286	NA	0.2494	2.23639	-2.16951	1.88357	-1.15181
ENSG00000262905.1	AC015853.1	0.222304	NA	0.283432	1.45487	-2.16939	2.02248	-1.07264
ENSG00000227745.1	AC098826.2	0.222749	NA	0.336048	2.71645	-2.16651	2.25208	-0.962002
ENSG00000096006.11	CRISP3	0.222761	0.484281	0.246993	15.4146	-2.16643	1.87135	-1.15769
ENSG00000215174.2	NLRP2B	0.22288	NA	0.149147	2.32949	-2.16566	1.50127	-1.44255
ENSG00000186675.7	MAGEE2	0.223162	0.0510176	0.00997491	9.92175	-2.16384	0.839771	-2.5767
ENSG00000227455.3	AL450345.1	0.223525	NA	0.1786	1.84648	-2.16149	1.60697	-1.34508
ENSG00000235433.1	MTATP6P17	0.223914	NA	0.12347	1.99996	-2.15898	1.4016	-1.54037
ENSG00000222000.7	AC092675.1	0.223976	NA	0.261753	2.13616	-2.15859	1.92343	-1.12226
ENSG00000253167.1	WASHC5-AS1	0.224076	0.235389	0.0817825	4.02383	-2.15794	1.23988	-1.74044
ENSG00000275676.1	BX005040.1	0.224586	NA	0.485555	0.535778	-2.15466	3.08958	-0.697396
ENSG00000286368.1	AL031767.2	0.224586	NA	0.485555	0.535778	-2.15466	3.08958	-0.697396
ENSG00000285790.1	AC021517.2	0.224586	NA	0.485555	0.535778	-2.15466	3.08958	-0.697396
ENSG00000283095.1	FP565171.1	0.224586	NA	0.485555	0.535778	-2.15466	3.08958	-0.697396
ENSG00000287359.1	AL138740.1	0.224586	NA	0.485555	0.535778	-2.15466	3.08958	-0.697396
ENSG00000230851.1	AP006294.1	0.224618	NA	0.418566	0.52813	-2.15446	2.6634	-0.808912
ENSG00000225321.2	LINC01427	0.224618	NA	0.418566	0.52813	-2.15446	2.6634	-0.808912
ENSG00000279971.1	AC020910.7	0.22467	0.189839	0.0598098	3.23633	-2.15412	1.14447	-1.88219
ENSG00000234466.1	AL590240.2	0.224945	NA	0.423483	0.530282	-2.15236	2.68912	-0.800394
ENSG00000286518.1	AL354743.1	0.225054	NA	0.390493	0.863657	-2.15166	2.50565	-0.858724
ENSG00000287463.1	AC110620.2	0.225188	NA	0.254968	2.11835	-2.1508	1.88937	-1.13837
ENSG00000168878.19	SFTPB	0.225468	NA	0.486734	0.505009	-2.14901	3.08982	-0.695513
ENSG00000260352.1	AC092287.1	0.225475	NA	0.255486	1.49395	-2.14896	1.88982	-1.13712
ENSG00000148734.8	NPFFR1	0.225515	0.0375498	0.00668075	28.311	-2.1487	0.792191	-2.71235
ENSG00000146678.10	IGFBP1	0.225971	NA	0.247539	1.72578	-2.14579	1.85566	-1.15635
ENSG00000229273.1	BX664615.1	0.226589	NA	0.20655	0.87726	-2.14185	1.69569	-1.26311
ENSG00000266954.1	AP001010.1	0.226994	NA	0.424815	0.497002	-2.13927	2.68047	-0.798095
ENSG00000228044.3	AL160408.1	0.227011	NA	0.488792	0.511491	-2.13916	3.09024	-0.692232
ENSG00000135625.8	EGR4	0.227087	NA	0.166088	2.11785	-2.13868	1.54431	-1.38488
ENSG00000230116.1	RPS3AP11	0.22731	NA	0.415641	0.499154	-2.13727	2.62561	-0.814006
ENSG00000251298.1	AC093835.1	0.227536	NA	0.26311	1.45105	-2.13583	1.90858	-1.11907
ENSG00000248771.5	SMIM31	0.22759	0.234789	0.0814838	6.66786	-2.13549	1.22579	-1.74214
ENSG00000217862.2	H4C10P	0.22773	NA	0.198536	1.34063	-2.1346	1.66022	-1.28573
ENSG00000259066.5	AL110118.2	0.227898	0.0675719	0.0145221	6.36868	-2.13354	0.87294	-2.44408
ENSG00000287875.1	AC068193.1	0.22798	NA	0.490077	0.501547	-2.13302	3.0905	-0.690186
ENSG00000270927.1	AL645944.1	0.228046	NA	0.490165	0.510396	-2.13261	3.09052	-0.690047
ENSG00000229871.1	RPSAP20	0.228046	NA	0.490165	0.510396	-2.13261	3.09052	-0.690047
ENSG00000124479.11	NDP	0.228241	3.13504e-05	1.0688e-06	170.63	-2.13137	0.436889	-4.87853
ENSG00000255459.1	AC105233.2	0.228357	NA	0.206796	0.932621	-2.13064	1.68774	-1.26242
ENSG00000229611.2	LINC02851	0.228453	NA	0.490705	0.48576	-2.13003	3.09063	-0.689189
ENSG00000186329.9	TMEM212	0.228453	NA	0.490705	0.48576	-2.13003	3.09063	-0.689189
ENSG00000287357.1	AL512484.1	0.228453	NA	0.490705	0.48576	-2.13003	3.09063	-0.689189
ENSG00000254102.2	AC090136.3	0.228453	NA	0.490705	0.48576	-2.13003	3.09063	-0.689189
ENSG00000236511.2	LINC01231	0.228453	NA	0.490705	0.48576	-2.13003	3.09063	-0.689189
ENSG00000259749.1	NCAPGP2	0.228463	NA	0.490718	0.501306	-2.12997	3.09064	-0.689168
ENSG00000187600.14	LINC02583	0.228463	NA	0.490718	0.501306	-2.12997	3.09064	-0.689168
ENSG00000237689.1	AC007064.2	0.229021	NA	0.0576754	2.58571	-2.12645	1.12027	-1.89816
ENSG00000203972.10	GLYATL3	0.229081	0.0163976	0.00228079	15.3061	-2.12607	0.696843	-3.051
ENSG00000224316.1	GTF2IP5	0.229237	NA	NA	0.46758	-2.12509	3.09085	-0.687542
ENSG00000171360.4	KRT38	0.229237	NA	NA	0.46758	-2.12509	3.09085	-0.687542
ENSG00000257666.1	CBX3P5	0.229391	NA	0.308413	0.887539	-2.12412	2.08542	-1.01856
ENSG00000266469.2	AC005288.1	0.229486	NA	0.131818	1.38414	-2.12352	1.40913	-1.50697
ENSG00000100987.14	VSX1	0.229558	0.416562	0.194804	5.52939	-2.12307	1.63754	-1.2965
ENSG00000239367.2	RN7SL477P	0.229564	NA	0.435953	0.49556	-2.12303	2.72517	-0.779046
ENSG00000198797.7	BRINP2	0.229884	2.28598e-07	3.14255e-09	310.587	-2.12102	0.358041	-5.92397
ENSG00000270103.3	AL360012.1	0.229956	0.381603	0.170695	4.3958	-2.12057	1.54789	-1.36997
ENSG00000079931.15	MOXD1	0.230976	1.74812e-12	3.57207e-15	7326.92	-2.11418	0.268669	-7.8691
ENSG00000242370.1	KCNAB1-AS1	0.231008	NA	0.432505	0.506802	-2.11398	2.69328	-0.784912
ENSG00000187054.15	TMPRSS11A	0.231393	3.04829e-05	1.02953e-06	675.253	-2.11159	0.432179	-4.88591
ENSG00000223586.6	LINC01312	0.23144	NA	0.361022	0.530067	-2.11129	2.31141	-0.91342
ENSG00000231956.1	HNRNPA1P9	0.231893	NA	0.224092	0.823635	-2.10847	1.73434	-1.21572
ENSG00000253819.2	LINC01151	0.232077	NA	0.265395	1.45284	-2.10733	1.89213	-1.11373
ENSG00000278911.1	AC015819.3	0.232128	NA	0.495543	0.501056	-2.10701	3.09164	-0.681519
ENSG00000254016.3	ALG1L10P	0.232282	NA	0.163052	2.23321	-2.10605	1.50984	-1.39488
ENSG00000232467.2	TMA16P2	0.232423	NA	0.4529	0.500876	-2.10518	2.8047	-0.750589
ENSG00000266379.6	AC090616.5	0.232549	NA	0.372848	1.23163	-2.1044	2.36143	-0.891151
ENSG00000225174.2	OSTM1-AS1	0.232743	0.00248337	0.000214865	28.5912	-2.10319	0.568297	-3.70087
ENSG00000280032.1	AP002800.1	0.232812	0.0668541	0.0143055	10.2655	-2.10276	0.858446	-2.4495
ENSG00000204993.3	CRTC1P1	0.233089	NA	0.440913	0.503027	-2.10105	2.72633	-0.770652
ENSG00000251544.1	MTND5P12	0.233188	NA	0.229561	1.49736	-2.10043	1.74819	-1.20149
ENSG00000197692.5	CBX3P7	0.233193	NA	0.309429	0.862661	-2.1004	2.06647	-1.01642
ENSG00000232474.1	NCKAP5-IT1	0.233612	NA	0.439951	0.510146	-2.09781	2.7164	-0.772277
ENSG00000259735.1	AC092868.3	0.233612	NA	0.439951	0.510146	-2.09781	2.7164	-0.772277
ENSG00000153347.10	FAM81B	0.233626	0.000390939	2.21712e-05	35.3087	-2.09773	0.494534	-4.24182
ENSG00000229331.1	GK-IT1	0.233666	NA	0.301914	0.854763	-2.09748	2.03178	-1.03234
ENSG00000273232.1	AC090912.3	0.233725	NA	0.204483	1.28596	-2.09711	1.65273	-1.26888
ENSG00000244167.1	AC005532.2	0.233777	NA	0.497697	0.517794	-2.0968	3.09209	-0.678117
ENSG00000237752.2	AL354685.2	0.233777	NA	0.497697	0.517794	-2.0968	3.09209	-0.678117
ENSG00000270098.1	LDHAL6EP	0.233777	NA	0.497697	0.517794	-2.0968	3.09209	-0.678117
ENSG00000170967.5	DDI1	0.233898	NA	0.497856	0.496115	-2.09605	3.09212	-0.677867
ENSG00000261298.1	AC122134.1	0.233898	NA	0.497856	0.496115	-2.09605	3.09212	-0.677867
ENSG00000280444.1	AC073592.10	0.233999	NA	0.438925	0.49157	-2.09543	2.70724	-0.77401
ENSG00000262120.1	AC010547.6	0.233999	NA	0.438925	0.49157	-2.09543	2.70724	-0.77401
ENSG00000288082.1	AC023787.3	0.234237	NA	0.498297	0.487025	-2.09396	3.09221	-0.677171
ENSG00000228923.1	AP000355.1	0.234237	NA	0.498297	0.487025	-2.09396	3.09221	-0.677171
ENSG00000267522.1	LINC01864	0.234469	0.0951325	0.0229241	5.71011	-2.09253	0.919917	-2.2747
ENSG00000161609.10	CCDC155	0.234504	0.3659	0.159713	6.47016	-2.09232	1.4881	-1.40604
ENSG00000147862.17	NFIB	0.234542	6.43772e-10	3.69255e-12	2203.72	-2.09208	0.301085	-6.94848
ENSG00000250677.1	AC114781.3	0.234895	NA	0.449938	0.498267	-2.08991	2.7662	-0.755518
ENSG00000152669.9	CCNO	0.235105	0.0268582	0.00435104	23.3074	-2.08862	0.73246	-2.85152
ENSG00000237832.1	AL138808.1	0.235319	NA	0.465703	0.508524	-2.08731	2.86134	-0.729488
ENSG00000229840.2	ISCA1P2	0.235444	NA	0.465188	0.512083	-2.08654	2.85699	-0.73033
ENSG00000235084.3	CHCHD2P6	0.235763	0.00181604	0.00014557	12.1948	-2.08459	0.548792	-3.79851
ENSG00000278720.1	AL669942.2	0.236017	NA	0.231676	0.883754	-2.08304	1.7416	-1.19605
ENSG00000272808.4	AC015712.6	0.236167	0.135999	0.0373887	10.4268	-2.08212	1.0003	-2.08149
ENSG00000224396.1	METTL15P3	0.236199	NA	0.444448	0.479018	-2.08192	2.72252	-0.764704
ENSG00000154654.15	NCAM2	0.236285	1.52169e-06	2.86937e-08	388.857	-2.0814	0.375079	-5.54923
ENSG00000287894.1	AC174469.1	0.236429	NA	0.125016	1.80622	-2.08052	1.35622	-1.53406
ENSG00000277957.1	SENP3-EIF4A1	0.236615	NA	NA	97.6152	-2.07939	1.29729	-1.60287
ENSG00000185518.11	SV2B	0.236947	0.000131525	5.94231e-06	183.294	-2.07737	0.458738	-4.52843
ENSG00000280189.1	AC007614.2	0.236994	NA	0.314949	0.84838	-2.07708	2.06696	-1.00489
ENSG00000287457.1	AC005821.2	0.237113	NA	0.502024	0.472321	-2.07635	3.093	-0.671308
ENSG00000257360.1	AC123567.1	0.237258	NA	0.455409	0.485715	-2.07547	2.78054	-0.746428
ENSG00000260014.1	LSM3P5	0.237258	NA	0.455409	0.485715	-2.07547	2.78054	-0.746428
ENSG00000239840.1	RPL23AP72	0.237433	NA	0.502437	0.494564	-2.07441	3.09308	-0.670661
ENSG00000223735.1	OR51B3P	0.237433	NA	0.502437	0.494564	-2.07441	3.09308	-0.670661
ENSG00000280377.1	AC027176.3	0.237433	NA	0.502437	0.494564	-2.07441	3.09308	-0.670661
ENSG00000229756.1	RPL31P20	0.237433	NA	0.502437	0.494564	-2.07441	3.09308	-0.670661
ENSG00000241059.2	AC008799.2	0.237433	NA	0.502437	0.494564	-2.07441	3.09308	-0.670661
ENSG00000204022.9	LIPJ	0.237477	0.0266936	0.00431384	9.47433	-2.07414	0.726684	-2.85425
ENSG00000227920.3	AL353597.1	0.237532	NA	0.502565	0.483322	-2.0738	3.09311	-0.670459
ENSG00000242318.1	AC058823.1	0.237532	NA	0.502565	0.483322	-2.0738	3.09311	-0.670459
ENSG00000163060.8	TEKT4	0.237808	NA	NA	0.449596	-2.07213	3.09319	-0.669901
ENSG00000229278.2	AL133353.1	0.237808	NA	NA	0.449596	-2.07213	3.09319	-0.669901
ENSG00000267686.2	AC090771.2	0.237808	NA	NA	0.449596	-2.07213	3.09319	-0.669901
ENSG00000235118.8	FAM237A	0.237808	NA	NA	0.449596	-2.07213	3.09319	-0.669901
ENSG00000214360.5	EFCAB9	0.237808	NA	NA	0.449596	-2.07213	3.09319	-0.669901
ENSG00000227515.3	C1DP4	0.237912	NA	0.232797	0.891893	-2.0715	1.73611	-1.19318
ENSG00000241941.2	RPL32P26	0.237982	NA	0.289324	0.85597	-2.07107	1.95457	-1.05961
ENSG00000109158.11	GABRA4	0.238764	0.000164244	7.80153e-06	55.5045	-2.06634	0.462211	-4.47056
ENSG00000274966.1	AC019322.5	0.239596	NA	0.0935497	1.95521	-2.06132	1.2292	-1.67696
ENSG00000244383.2	FAM3D-AS1	0.23966	0.147013	0.0417296	7.37132	-2.06094	1.01215	-2.03621
ENSG00000238250.1	ST6GAL2-IT1	0.239883	NA	0.193783	1.66942	-2.0596	1.58495	-1.29947
ENSG00000261327.5	AC134312.5	0.240017	NA	0.296922	2.36754	-2.05879	1.97381	-1.04306
ENSG00000261434.1	AC021087.4	0.240062	NA	0.336142	1.26698	-2.05852	2.14024	-0.961816
ENSG00000254932.2	AP001007.1	0.240287	NA	0.31766	1.38839	-2.05717	2.05865	-0.999279
ENSG00000245870.4	LINC00682	0.240394	0.115181	0.0296592	34.2431	-2.05653	0.945699	-2.17461
ENSG00000240045.2	STRIT1	0.240405	0.0367822	0.0064954	16.474	-2.05646	0.75559	-2.72166
ENSG00000272253.1	RNA5SP386	0.240435	NA	0.469635	0.489804	-2.05628	2.8438	-0.723073
ENSG00000236958.1	AC051618.1	0.240441	NA	0.44042	0.47165	-2.05625	2.66531	-0.771484
ENSG00000250026.5	TMPRSS11BNL	0.240464	0.00653318	0.000716202	26.6332	-2.05611	0.607722	-3.3833
ENSG00000175471.19	MCTP1	0.240788	7.06391e-10	4.07704e-12	698.97	-2.05417	0.296225	-6.93448
ENSG00000267694.1	AP005131.5	0.240815	NA	0.353793	0.483107	-2.054	2.21514	-0.927257
ENSG00000246115.3	SUPT4H1P2	0.240847	NA	0.328439	0.87598	-2.05381	2.10159	-0.977262
ENSG00000285724.2	AC092110.1	0.240884	NA	0.283117	1.36005	-2.05359	1.91326	-1.07334
ENSG00000280365.1	AC021766.1	0.241139	NA	0.232932	1.45663	-2.05206	1.72032	-1.19284
ENSG00000226642.1	ACTG1P12	0.241248	NA	0.46204	0.476195	-2.05141	2.78917	-0.735491
ENSG00000144285.21	SCN1A	0.241261	8.16939e-06	2.10275e-07	815.455	-2.05133	0.395246	-5.19002
ENSG00000109132.7	PHOX2B	0.241944	0.0678931	0.0146081	170.798	-2.04725	0.838368	-2.44195
ENSG00000075891.22	PAX2	0.24223	4.99389e-06	1.16187e-07	1039.23	-2.04555	0.385997	-5.2994
ENSG00000225176.2	ATP5MGP4	0.24265	NA	0.467841	0.485044	-2.04305	2.81414	-0.725997
ENSG00000147246.10	HTR2C	0.242751	3.94175e-10	1.97829e-12	451.78	-2.04245	0.290286	-7.03601
ENSG00000276418.5	AC036214.3	0.24299	0.402886	0.185231	7.88752	-2.04103	1.54061	-1.32482
ENSG00000287426.1	AP003327.2	0.243024	NA	0.453312	0.487617	-2.04083	2.72145	-0.749904
ENSG00000226142.2	RPL35P8	0.243121	NA	0.466852	0.492163	-2.04025	2.80405	-0.72761
ENSG00000237359.2	AL354977.2	0.243213	0.401261	0.184211	4.00798	-2.03971	1.53604	-1.3279
ENSG00000255027.2	AP000842.2	0.243419	NA	0.204221	1.69262	-2.03848	1.60559	-1.26962
ENSG00000270071.3	AP001172.1	0.243662	1.77059e-05	5.37619e-07	18.6729	-2.03705	0.406403	-5.01238
ENSG00000248936.1	AC027607.1	0.243763	NA	0.510525	0.469042	-2.03645	3.09481	-0.658021
ENSG00000237870.6	AC073130.1	0.243763	NA	0.510525	0.469042	-2.03645	3.09481	-0.658021
ENSG00000286590.1	AL132775.1	0.243763	NA	0.510525	0.469042	-2.03645	3.09481	-0.658021
ENSG00000238259.1	PHF5GP	0.243763	NA	0.510525	0.469042	-2.03645	3.09481	-0.658021
ENSG00000201071.1	AC100840.1	0.243813	NA	0.159953	1.38981	-2.03615	1.44898	-1.40523
ENSG00000242152.1	AC108729.1	0.243827	NA	0.458881	0.473587	-2.03607	2.74888	-0.740691
ENSG00000274658.1	TBC1D3J	0.243831	NA	0.357346	0.481906	-2.03605	2.21205	-0.920434
ENSG00000259569.2	AC013489.2	0.243833	NA	0.510614	0.499811	-2.03603	3.09483	-0.657882
ENSG00000264468.1	MIR4520-1	0.243899	NA	0.229623	0.863844	-2.03564	1.69449	-1.20133
ENSG00000162631.18	NTNG1	0.243953	3.79874e-08	3.97646e-10	779.045	-2.03533	0.325395	-6.25495
ENSG00000185742.7	C11orf87	0.244216	1.5279e-06	2.88655e-08	109.761	-2.03377	0.366566	-5.54818
ENSG00000240068.1	RPL21P42	0.244231	NA	0.31048	0.866756	-2.03368	2.00518	-1.01421
ENSG00000258910.3	LINC01956	0.244292	NA	0.20071	2.36015	-2.03332	1.58911	-1.27953
ENSG00000273141.1	AP001269.4	0.244293	NA	0.234528	0.843698	-2.03332	1.71043	-1.18877
ENSG00000229533.1	AC003986.1	0.244654	0.0917544	0.0219	28.7883	-2.03118	0.886168	-2.2921
ENSG00000240138.1	EEF1GP4	0.244745	NA	0.382988	0.493363	-2.03065	2.32765	-0.872403
ENSG00000277619.1	AC008406.3	0.244834	0.000387525	2.18514e-05	28.0742	-2.03013	0.47823	-4.24508
ENSG00000257921.6	AC025165.3	0.245014	0.250228	0.089546	178.858	-2.02907	1.19512	-1.6978
ENSG00000283051.1	LINC01668	0.245363	0.139658	0.0387957	3.23558	-2.02701	0.980964	-2.06635
ENSG00000215367.10	TMED11P	0.246139	NA	0.289269	1.38235	-2.02246	1.90847	-1.05973
ENSG00000232867.1	AL355433.1	0.246222	NA	0.420069	0.871621	-2.02197	2.50771	-0.806301
ENSG00000258952.2	SALRNA1	0.246415	0.0105294	0.00129961	29.1035	-2.02084	0.628357	-3.21607
ENSG00000285712.1	AC068707.1	0.246508	NA	0.196699	2.64197	-2.02029	1.56489	-1.29101
ENSG00000185078.3	RPL9P14	0.246536	0.140786	0.039218	3.97793	-2.02013	0.979745	-2.06189
ENSG00000286629.1	AC005803.1	0.246596	NA	0.12782	2.2968	-2.01978	1.3264	-1.52275
ENSG00000215559.8	ANKRD20A11P	0.246598	0.00551904	0.000576932	16.2717	-2.01976	0.58676	-3.44223
ENSG00000259447.1	AC013652.2	0.246658	NA	0.514175	0.458882	-2.01942	3.0956	-0.652351
ENSG00000263627.1	PPP4R1-AS1	0.246658	NA	0.514175	0.458882	-2.01942	3.0956	-0.652351
ENSG00000254566.1	AC087277.1	0.246658	NA	0.514175	0.458882	-2.01942	3.0956	-0.652351
ENSG00000223742.1	AC112495.1	0.246658	NA	0.514175	0.458882	-2.01942	3.0956	-0.652351
ENSG00000230668.2	AL844175.1	0.246658	NA	0.514175	0.458882	-2.01942	3.0956	-0.652351
ENSG00000227713.2	AC092159.1	0.246724	NA	0.514258	0.454337	-2.01903	3.09562	-0.652222
ENSG00000249163.3	AL121809.2	0.246724	NA	0.514258	0.454337	-2.01903	3.09562	-0.652222
ENSG00000260420.3	LINC02182	0.246788	NA	0.514338	0.449792	-2.01865	3.09563	-0.652097
ENSG00000232091.1	PNLIPP1	0.246788	NA	0.514338	0.449792	-2.01865	3.09563	-0.652097
ENSG00000248371.5	LINC02056	0.246788	NA	0.514338	0.449792	-2.01865	3.09563	-0.652097
ENSG00000283215.2	LINC02537	0.246788	NA	0.514338	0.449792	-2.01865	3.09563	-0.652097
ENSG00000236305.1	SLC12A9-AS1	0.246859	NA	0.514427	0.445247	-2.01824	3.09565	-0.65196
ENSG00000138813.10	C4orf17	0.246859	NA	0.514427	0.445247	-2.01824	3.09565	-0.65196
ENSG00000279275.1	AP002505.2	0.247088	NA	0.514715	0.467731	-2.0169	3.09571	-0.651514
ENSG00000251632.1	LINC02172	0.247088	NA	0.514715	0.467731	-2.0169	3.09571	-0.651514
ENSG00000271093.1	IGLCOR22-2	0.247088	NA	0.514715	0.467731	-2.0169	3.09571	-0.651514
ENSG00000234844.1	CDC42P2	0.247134	NA	0.174868	1.27761	-2.01664	1.4864	-1.35673
ENSG00000283900.1	TPTEP2-CSNK1E	0.247165	0.00159623	0.000124517	243.314	-2.01645	0.525521	-3.83706
ENSG00000222790.1	RNU4-14P	0.247363	NA	0.197041	0.806378	-2.0153	1.56221	-1.29003
ENSG00000286044.1	AP001977.1	0.247406	NA	0.515113	0.465338	-2.01505	3.0958	-0.650897
ENSG00000234068.7	PAGE2	0.247406	NA	0.515113	0.465338	-2.01505	3.0958	-0.650897
ENSG00000163599.17	CTLA4	0.247406	NA	0.515113	0.465338	-2.01505	3.0958	-0.650897
ENSG00000163519.14	TRAT1	0.247406	NA	0.515113	0.465338	-2.01505	3.0958	-0.650897
ENSG00000235248.3	OR13C1P	0.247536	NA	0.515276	0.47658	-2.01429	3.09584	-0.650645
ENSG00000239706.1	AC117392.1	0.247536	NA	0.515276	0.47658	-2.01429	3.09584	-0.650645
ENSG00000196844.9	PATE2	0.247536	NA	0.515276	0.47658	-2.01429	3.09584	-0.650645
ENSG00000118156.12	ZNF541	0.247536	NA	0.515276	0.47658	-2.01429	3.09584	-0.650645
ENSG00000285231.1	OOSP3	0.247536	NA	0.515276	0.47658	-2.01429	3.09584	-0.650645
ENSG00000157884.11	CIB4	0.247536	NA	0.515276	0.47658	-2.01429	3.09584	-0.650645
ENSG00000222032.1	AC112721.2	0.247536	NA	0.515276	0.47658	-2.01429	3.09584	-0.650645
ENSG00000240440.1	AC007879.4	0.247536	NA	0.515276	0.47658	-2.01429	3.09584	-0.650645
ENSG00000148377.6	IDI2	0.247536	NA	0.515276	0.47658	-2.01429	3.09584	-0.650645
ENSG00000228400.2	AC079154.1	0.248072	0.270884	0.100964	5.57981	-2.01117	1.22617	-1.6402
ENSG00000215325.4	ASS1P10	0.248445	NA	0.109562	2.42202	-2.009	1.2555	-1.60016
ENSG00000267405.1	AC005180.1	0.248774	NA	0.286869	1.36356	-2.00709	1.88457	-1.06501
ENSG00000140403.12	DNAJA4	0.248796	0.015079	0.00205016	1051.77	-2.00696	0.651005	-3.08287
ENSG00000254245.3	PCDHGA3	0.249291	NA	NA	30.7438	-2.0041	0.961942	-2.08339
ENSG00000263693.1	MIR3161	0.249321	NA	0.148149	1.37306	-2.00393	1.38574	-1.4461
ENSG00000249781.7	LINC02112	0.249402	NA	0.517607	0.44835	-2.00346	3.09634	-0.647039
ENSG00000269950.1	AP000962.1	0.249557	NA	0.298647	1.38951	-2.00256	1.92676	-1.03934
ENSG00000256995.8	AC084816.1	0.249734	7.05624e-05	2.7828e-06	261.301	-2.00154	0.42711	-4.68623
ENSG00000152611.12	CAPSL	0.249858	0.0395841	0.00713634	21.9051	-2.00082	0.743685	-2.69041
ENSG00000125084.12	WNT1	0.25036	0.0429144	0.00794752	30.1226	-1.99792	0.752714	-2.65429
ENSG00000286732.1	AC091181.2	0.250376	0.11962	0.0311881	11.2245	-1.99783	0.927213	-2.15466
ENSG00000254968.7	LINC02763	0.250952	0.107075	0.0269003	7.38156	-1.99452	0.901289	-2.21296
ENSG00000224238.2	WARS2-IT1	0.251208	NA	0.19554	2.58847	-1.99305	1.53979	-1.29436
ENSG00000253844.1	AC064807.2	0.251262	NA	0.188567	1.89886	-1.99273	1.51558	-1.31483
ENSG00000203395.2	AC015969.1	0.251564	NA	0.520292	0.458211	-1.99101	3.09693	-0.642896
ENSG00000181518.4	OR8D4	0.251564	NA	0.520292	0.458211	-1.99101	3.09693	-0.642896
ENSG00000264014.1	MIR4253	0.251641	NA	0.322426	0.488603	-1.99056	2.01172	-0.989485
ENSG00000279817.1	AC073911.2	0.251775	NA	0.188486	2.05791	-1.98979	1.51307	-1.31507
ENSG00000203546.7	AL139353.1	0.251807	0.052339	0.0103066	22.0614	-1.98961	0.775563	-2.56537
ENSG00000274294.1	AC015660.3	0.251925	NA	0.228605	1.31058	-1.98893	1.65199	-1.20396
ENSG00000178412.4	AC068473.1	0.251977	NA	0.520803	0.474179	-1.98864	3.09704	-0.642108
ENSG00000227510.4	LINC01442	0.251977	NA	0.520803	0.474179	-1.98864	3.09704	-0.642108
ENSG00000270935.1	AL021808.1	0.251977	NA	0.520803	0.474179	-1.98864	3.09704	-0.642108
ENSG00000231386.1	AC007395.1	0.251977	NA	0.520803	0.474179	-1.98864	3.09704	-0.642108
ENSG00000234270.1	RPL36P20	0.251977	NA	0.520803	0.474179	-1.98864	3.09704	-0.642108
ENSG00000213384.2	EIF4E2P1	0.251977	NA	0.520803	0.474179	-1.98864	3.09704	-0.642108
ENSG00000231857.1	MORF4L1P5	0.251977	NA	0.520803	0.474179	-1.98864	3.09704	-0.642108
ENSG00000251306.1	NDUFB4P2	0.251977	NA	0.520803	0.474179	-1.98864	3.09704	-0.642108
ENSG00000268472.2	AP002884.3	0.252013	NA	0.520848	0.465089	-1.98843	3.09705	-0.642039
ENSG00000250115.2	AK3P2	0.252013	NA	0.520848	0.465089	-1.98843	3.09705	-0.642039
ENSG00000266312.2	LINC01927	0.252049	NA	0.287975	1.55033	-1.98822	1.87113	-1.06258
ENSG00000229593.1	SUCLA2P3	0.252118	NA	0.520977	0.46706	-1.98783	3.09708	-0.64184
ENSG00000286748.1	AC145625.2	0.252118	NA	0.520977	0.46706	-1.98783	3.09708	-0.64184
ENSG00000254865.1	AC100763.1	0.252118	NA	0.520977	0.46706	-1.98783	3.09708	-0.64184
ENSG00000236744.2	AC016822.1	0.25258	0.0491258	0.00947379	4.54643	-1.98519	0.765162	-2.59447
ENSG00000277112.3	ANKRD20A21P	0.252608	0.221311	0.0751816	3.89253	-1.98503	1.11559	-1.77935
ENSG00000225684.4	FAM225B	0.252621	0.0252531	0.00401879	21.7436	-1.98495	0.690015	-2.87668
ENSG00000135824.12	RGS8	0.253435	9.26128e-05	3.87118e-06	116.77	-1.98031	0.428807	-4.61818
ENSG00000171388.12	APLN	0.253535	5.66043e-09	4.60627e-11	348.46	-1.97974	0.300729	-6.58314
ENSG00000254777.5	AC022182.1	0.253636	NA	0.27864	2.47755	-1.97917	1.82685	-1.08338
ENSG00000135973.3	GPR45	0.25376	0.0632958	0.0133081	6.97645	-1.97846	0.799244	-2.47542
ENSG00000278914.1	AP003355.3	0.253776	NA	0.472852	0.469634	-1.97837	2.75598	-0.717847
ENSG00000255115.2	AP002812.4	0.253776	NA	0.472852	0.469634	-1.97837	2.75598	-0.717847
ENSG00000276257.1	AL513478.1	0.253847	NA	0.383222	0.460363	-1.97797	2.26838	-0.871975
ENSG00000234812.1	BX664727.2	0.253847	NA	0.383222	0.460363	-1.97797	2.26838	-0.871975
ENSG00000275519.1	MIR6804	0.253847	NA	0.383222	0.460363	-1.97797	2.26838	-0.871975
ENSG00000168267.7	PTF1A	0.253864	NA	0.28557	2.99652	-1.97787	1.85213	-1.06789
ENSG00000172716.16	SLFN11	0.254048	1.15362e-07	1.4211e-09	405.266	-1.97683	0.326583	-6.05307
ENSG00000287514.2	AL450267.2	0.254154	NA	0.523488	0.451058	-1.97623	3.09764	-0.637979
ENSG00000103375.11	AQP8	0.254154	NA	0.523488	0.451058	-1.97623	3.09764	-0.637979
ENSG00000162398.11	LEXM	0.254154	NA	0.523488	0.451058	-1.97623	3.09764	-0.637979
ENSG00000284491.2	THSD8	0.254195	NA	0.2551	1.30204	-1.97599	1.7363	-1.13805
ENSG00000101542.10	CDH20	0.254368	9.07839e-06	2.41808e-07	294.09	-1.97501	0.382462	-5.16394
ENSG00000232337.1	AC009313.2	0.254514	NA	0.48139	0.455603	-1.97418	2.80396	-0.704068
ENSG00000242078.1	AC084864.1	0.254676	NA	0.324307	1.20362	-1.97326	2.002	-0.985645
ENSG00000217455.8	AC073316.1	0.254697	NA	0.289601	2.01044	-1.97314	1.86322	-1.059
ENSG00000212242.1	RNA5SP219	0.254715	NA	0.483122	0.476331	-1.97304	2.81345	-0.701291
ENSG00000165383.11	LRRC18	0.254893	0.0708076	0.0155195	9.72335	-1.97203	0.814882	-2.42002
ENSG00000285681.2	AC091576.1	0.254928	0.131753	0.0357827	4.01751	-1.97184	0.939243	-2.09939
ENSG00000278367.1	AL356652.1	0.25493	NA	0.524441	0.481827	-1.97183	3.09785	-0.636515
ENSG00000240097.1	AC104164.2	0.25493	NA	0.524441	0.481827	-1.97183	3.09785	-0.636515
ENSG00000275944.1	AC244100.3	0.25493	NA	0.524441	0.481827	-1.97183	3.09785	-0.636515
ENSG00000228650.2	AC008940.1	0.25493	NA	0.524441	0.481827	-1.97183	3.09785	-0.636515
ENSG00000197334.2	AC087579.1	0.25493	NA	0.524441	0.481827	-1.97183	3.09785	-0.636515
ENSG00000286893.1	AC015660.5	0.25493	NA	0.524441	0.481827	-1.97183	3.09785	-0.636515
ENSG00000228098.1	AC110620.1	0.25493	NA	0.524441	0.481827	-1.97183	3.09785	-0.636515
ENSG00000261673.1	AC009075.1	0.25493	NA	0.524441	0.481827	-1.97183	3.09785	-0.636515
ENSG00000241917.1	AC084398.1	0.25493	NA	0.524441	0.481827	-1.97183	3.09785	-0.636515
ENSG00000270385.1	AC133539.1	0.25493	NA	0.524441	0.481827	-1.97183	3.09785	-0.636515
ENSG00000237574.1	LINC01856	0.25493	NA	0.524441	0.481827	-1.97183	3.09785	-0.636515
ENSG00000270778.1	BUB1P1	0.25493	NA	0.524441	0.481827	-1.97183	3.09785	-0.636515
ENSG00000248901.2	LINC01846	0.25493	NA	0.524441	0.481827	-1.97183	3.09785	-0.636515
ENSG00000268465.1	AC008403.1	0.25493	NA	0.524441	0.481827	-1.97183	3.09785	-0.636515
ENSG00000253658.6	LINC01592	0.25493	NA	0.524441	0.481827	-1.97183	3.09785	-0.636515
ENSG00000267137.1	AC005901.1	0.25493	NA	0.524441	0.481827	-1.97183	3.09785	-0.636515
ENSG00000285974.1	AC026624.1	0.25493	NA	0.524441	0.481827	-1.97183	3.09785	-0.636515
ENSG00000237013.1	LINC01812	0.25493	NA	0.524441	0.481827	-1.97183	3.09785	-0.636515
ENSG00000237174.7	AL445465.2	0.25493	NA	0.524441	0.481827	-1.97183	3.09785	-0.636515
ENSG00000260828.1	HMGB3P32	0.25493	NA	0.524441	0.481827	-1.97183	3.09785	-0.636515
ENSG00000259058.1	AF111169.2	0.25493	NA	0.524441	0.481827	-1.97183	3.09785	-0.636515
ENSG00000288580.1	AC023296.1	0.25493	NA	0.524441	0.481827	-1.97183	3.09785	-0.636515
ENSG00000235539.1	MTND1P33	0.25493	NA	0.524441	0.481827	-1.97183	3.09785	-0.636515
ENSG00000231610.1	PIK3CDP1	0.25493	NA	0.524441	0.481827	-1.97183	3.09785	-0.636515
ENSG00000259087.5	AL121790.2	0.25493	NA	0.524441	0.481827	-1.97183	3.09785	-0.636515
ENSG00000236969.2	GGT8P	0.25493	NA	0.524441	0.481827	-1.97183	3.09785	-0.636515
ENSG00000261407.2	AC013565.3	0.25493	NA	0.524441	0.481827	-1.97183	3.09785	-0.636515
ENSG00000251286.2	AC097522.1	0.25493	NA	0.524441	0.481827	-1.97183	3.09785	-0.636515
ENSG00000218689.2	RPL5P21	0.25493	NA	0.524441	0.481827	-1.97183	3.09785	-0.636515
ENSG00000223553.6	SMPD4P1	0.25493	NA	0.524441	0.481827	-1.97183	3.09785	-0.636515
ENSG00000253857.2	AC022679.1	0.25493	NA	0.524441	0.481827	-1.97183	3.09785	-0.636515
ENSG00000273370.1	AC108747.1	0.25493	NA	0.524441	0.481827	-1.97183	3.09785	-0.636515
ENSG00000159261.12	CLDN14	0.25493	NA	0.524441	0.481827	-1.97183	3.09785	-0.636515
ENSG00000196266.5	OR10J3	0.25493	NA	0.524441	0.481827	-1.97183	3.09785	-0.636515
ENSG00000263588.1	AC091043.1	0.25493	NA	0.524441	0.481827	-1.97183	3.09785	-0.636515
ENSG00000226397.8	C12orf77	0.25493	NA	0.524441	0.481827	-1.97183	3.09785	-0.636515
ENSG00000287747.1	AF233439.3	0.25493	NA	0.524441	0.481827	-1.97183	3.09785	-0.636515
ENSG00000198502.6	HLA-DRB5	0.25493	NA	0.524441	0.481827	-1.97183	3.09785	-0.636515
ENSG00000230322.1	AL136320.1	0.25493	NA	0.524441	0.481827	-1.97183	3.09785	-0.636515
ENSG00000237286.1	CARD11-AS1	0.25493	NA	0.524441	0.481827	-1.97183	3.09785	-0.636515
ENSG00000272412.2	RN7SL778P	0.255306	NA	0.2789	0.818571	-1.9697	1.81909	-1.08279
ENSG00000255965.1	AC073916.1	0.255572	NA	0.287578	0.820732	-1.9682	1.85077	-1.06345
ENSG00000260815.3	PPIAP47	0.256124	NA	0.0937025	2.53776	-1.96509	1.17236	-1.67618
ENSG00000225559.1	AC083867.2	0.256215	NA	0.212062	2.11129	-1.96457	1.57428	-1.24792
ENSG00000280017.1	AC112200.2	0.256272	NA	0.236389	1.35872	-1.96425	1.65891	-1.18406
ENSG00000233920.2	AL162595.2	0.256848	NA	0.526787	0.45754	-1.96101	3.09837	-0.632918
ENSG00000149021.7	SCGB1A1	0.256848	NA	0.526787	0.45754	-1.96101	3.09837	-0.632918
ENSG00000266522.1	AP005242.2	0.256848	NA	0.526787	0.45754	-1.96101	3.09837	-0.632918
ENSG00000254733.1	AP001831.1	0.256848	NA	0.526787	0.45754	-1.96101	3.09837	-0.632918
ENSG00000172746.6	RPL12P13	0.257045	NA	NA	0.413628	-1.95991	3.09842	-0.63255
ENSG00000251619.1	LINC02508	0.257074	NA	0.527063	0.418173	-1.95974	3.09843	-0.632496
ENSG00000258035.2	AC123567.2	0.257097	0.276696	0.104216	4.34604	-1.95962	1.2061	-1.62475
ENSG00000125998.8	FAM83C	0.257133	NA	0.527135	0.427263	-1.95941	3.09844	-0.632386
ENSG00000267938.1	EIF1P6	0.257133	NA	0.527135	0.427263	-1.95941	3.09844	-0.632386
ENSG00000223626.1	LINC01044	0.25716	NA	0.527167	0.431808	-1.95926	3.09845	-0.632337
ENSG00000047936.10	ROS1	0.257194	NA	0.527208	0.436354	-1.95907	3.09846	-0.632273
ENSG00000250264.1	AL669918.1	0.257194	NA	0.527208	0.436354	-1.95907	3.09846	-0.632273
ENSG00000148386.9	LCN9	0.257262	0.64323	0.398343	8.58865	-1.95869	2.31911	-0.844584
ENSG00000250538.6	AC104407.1	0.2576	0.0043833	0.000430866	25.0764	-1.9568	0.555842	-3.52042
ENSG00000227969.1	NPM1P22	0.258018	NA	0.0678169	2.58004	-1.95445	1.07022	-1.82622
ENSG00000225978.3	HAR1A	0.258053	NA	0.286705	2.37143	-1.95426	1.83434	-1.06538
ENSG00000287289.1	AP000428.2	0.258202	NA	0.528436	0.447354	-1.95343	3.09873	-0.630396
ENSG00000284748.1	AL513220.1	0.258202	NA	0.528436	0.447354	-1.95343	3.09873	-0.630396
ENSG00000145794.17	MEGF10	0.25823	8.4353e-07	1.42302e-08	1825.21	-1.95327	0.344456	-5.67059
ENSG00000251209.9	LINC00923	0.258454	0.00188752	0.000153052	16.8433	-1.95202	0.515581	-3.78606
ENSG00000240739.1	AC006511.2	0.258535	NA	0.36067	0.850565	-1.95157	2.13499	-0.91409
ENSG00000240328.1	AC091805.1	0.258631	NA	0.321151	0.793478	-1.95103	1.96658	-0.992096
ENSG00000081248.11	CACNA1S	0.258902	0.519358	0.277804	6.53796	-1.94952	1.79636	-1.08527
ENSG00000256453.2	DND1	0.258928	0.0662785	0.0141374	6.08466	-1.94938	0.794447	-2.45375
ENSG00000163623.9	NKX6-1	0.259019	3.93422e-05	1.3878e-06	353.061	-1.94887	0.403765	-4.82675
ENSG00000281955.1	AC073488.3	0.259313	NA	0.1428	2.0921	-1.94724	1.32877	-1.46544
ENSG00000236796.1	AL157884.3	0.25943	NA	0.477623	0.439457	-1.94658	2.74116	-0.710131
ENSG00000188404.10	SELL	0.259467	6.08427e-05	2.32945e-06	130.776	-1.94638	0.412148	-4.72252
ENSG00000213272.5	RPL7AP9	0.259479	NA	0.345714	1.20054	-1.94631	2.0641	-0.942936
ENSG00000258024.1	OR5BT1P	0.259479	NA	0.345714	1.20054	-1.94631	2.0641	-0.942936
ENSG00000111490.15	TBC1D30	0.259489	8.32295e-19	2.38694e-22	376.618	-1.94626	0.200154	-9.7238
ENSG00000173610.12	UGT2A1	0.259499	0.000107921	4.65421e-06	95.5144	-1.9462	0.424953	-4.5798
ENSG00000155511.18	GRIA1	0.259682	0.000109003	4.72432e-06	1156.62	-1.94518	0.425021	-4.57667
ENSG00000266111.2	AC068025.2	0.260159	0.167153	0.050006	3.47551	-1.94253	0.991133	-1.95991
ENSG00000279542.1	AC015908.5	0.260378	NA	0.484045	0.444002	-1.94132	2.77406	-0.699811
ENSG00000116194.13	ANGPTL1	0.260426	6.80909e-05	2.64601e-06	449.52	-1.94105	0.413294	-4.69654
ENSG00000255063.1	AP001646.2	0.260563	0.122216	0.0321279	3.61468	-1.94029	0.905488	-2.14282
ENSG00000124915.10	MYRF-AS1	0.260684	NA	0.232146	1.54705	-1.93963	1.62332	-1.19485
ENSG00000267026.5	AL136084.2	0.260693	NA	0.196783	2.99271	-1.93958	1.50265	-1.29077
ENSG00000256056.1	AC087257.2	0.260866	NA	0.321586	1.55687	-1.93862	1.95582	-0.991205
ENSG00000271047.1	AC092447.9	0.261427	NA	0.268751	0.840765	-1.93552	1.75011	-1.10594
ENSG00000122543.11	OCM	0.261485	0.404202	0.186227	3.80569	-1.9352	1.46404	-1.32182
ENSG00000180138.7	CSNK1A1L	0.261651	0.11617	0.0299513	4.52791	-1.93429	0.891075	-2.17073
ENSG00000287241.1	AL359511.3	0.261746	NA	0.205876	2.18349	-1.93376	1.52868	-1.26499
ENSG00000231234.2	SKP1P1	0.262019	0.0845249	0.019629	13.5537	-1.93226	0.8281	-2.33336
ENSG00000222020.3	HDAC4-AS1	0.26215	0.0710465	0.0156025	9.13916	-1.93154	0.798788	-2.41808
ENSG00000172680.1	MOS	0.262256	NA	0.48215	0.435682	-1.93095	2.74732	-0.702849
ENSG00000268873.1	AC022601.1	0.262256	NA	0.48215	0.435682	-1.93095	2.74732	-0.702849
ENSG00000171478.7	SPACA5B	0.262503	NA	0.332686	0.799411	-1.92959	1.9919	-0.968717
ENSG00000286934.1	AC027251.1	0.262622	NA	0.0747535	2.38886	-1.92894	1.08247	-1.78197
ENSG00000229962.2	AP000221.1	0.262684	NA	0.292101	2.85119	-1.9286	1.83062	-1.05352
ENSG00000260326.1	PHBP21	0.262781	NA	0.279694	0.75169	-1.92807	1.78358	-1.08101
ENSG00000283293.1	RN7SK	0.26281	0.000355601	1.97081e-05	432.806	-1.92791	0.451695	-4.26817
ENSG00000272519.1	AC079610.2	0.263041	NA	0.317037	1.12799	-1.92664	1.92555	-1.00056
ENSG00000258416.1	AF123462.1	0.263413	NA	0.534724	0.447105	-1.9246	3.10015	-0.620811
ENSG00000234735.1	AL022237.1	0.263413	NA	0.534724	0.447105	-1.9246	3.10015	-0.620811
ENSG00000273396.3	LINC01396	0.263573	NA	0.222875	1.99588	-1.92372	1.57822	-1.21892
ENSG00000267618.5	AC004223.3	0.2636	NA	0.297524	0.833845	-1.92358	1.84647	-1.04176
ENSG00000223947.1	AC016738.1	0.263846	0.289487	0.111541	5.82902	-1.92223	1.20796	-1.59131
ENSG00000162670.11	BRINP3	0.264217	7.01754e-06	1.76602e-07	191.037	-1.92021	0.367685	-5.22242
ENSG00000251898.1	SCARNA11	0.264239	NA	0.37113	0.756989	-1.92008	2.14689	-0.894358
ENSG00000100557.9	CCDC198	0.264908	0.151943	0.0435721	15.6402	-1.91644	0.949585	-2.01818
ENSG00000220392.1	FCF1P5	0.265214	NA	0.136085	1.67106	-1.91477	1.28462	-1.49053
ENSG00000221630.3	MIR1179	0.265292	NA	0.113837	1.90823	-1.91435	1.21071	-1.58118
ENSG00000266274.2	RN7SL138P	0.265521	NA	0.494153	0.45165	-1.9131	2.79808	-0.683719
ENSG00000255648.1	AC087242.1	0.265539	NA	0.537265	0.433074	-1.913	3.10072	-0.616954
ENSG00000224789.1	AC012363.2	0.265539	NA	0.537265	0.433074	-1.913	3.10072	-0.616954
ENSG00000266924.1	AC021594.1	0.265539	NA	0.537265	0.433074	-1.913	3.10072	-0.616954
ENSG00000285524.1	AC073236.1	0.265539	NA	0.537265	0.433074	-1.913	3.10072	-0.616954
ENSG00000152578.13	GRIA4	0.265742	8.95638e-07	1.53474e-08	1514.14	-1.9119	0.337933	-5.65763
ENSG00000184486.10	POU3F2	0.266025	1.36281e-05	3.95726e-07	645.653	-1.91036	0.376723	-5.071
ENSG00000250432.5	FAM242C	0.266344	NA	0.448392	0.82109	-1.90864	2.51767	-0.758099
ENSG00000231437.3	LINC01750	0.266684	NA	0.30748	1.92377	-1.9068	1.86845	-1.02052
ENSG00000228275.1	ARMCX3-AS1	0.266735	NA	0.489756	0.415977	-1.90652	2.76029	-0.690696
ENSG00000269475.2	AC244102.2	0.266948	NA	0.456277	0.732865	-1.90537	2.55757	-0.744992
ENSG00000270141.3	TERC	0.267256	NA	0.253492	1.63969	-1.90371	1.66713	-1.14191
ENSG00000206784.1	AL158155.1	0.267258	NA	0.417821	0.445938	-1.90369	2.34964	-0.810207
ENSG00000070193.5	FGF10	0.267328	3.48745e-09	2.65197e-11	13137.5	-1.90332	0.285581	-6.66471
ENSG00000231442.3	LARP1BP1	0.267335	NA	0.256872	1.16821	-1.90328	1.67865	-1.13381
ENSG00000279593.1	AL132642.2	0.267774	NA	0.281393	0.815413	-1.90091	1.76469	-1.07719
ENSG00000257910.1	AC124784.1	0.26788	NA	NA	0.395644	-1.90034	3.10136	-0.612745
ENSG00000259584.1	AC021755.2	0.267984	0.418169	0.19611	4.25053	-1.89978	1.46961	-1.29271
ENSG00000285988.1	AL392086.2	0.268037	NA	0.540231	0.40019	-1.89949	3.1014	-0.612464
ENSG00000278456.1	AC015712.7	0.268081	0.205187	0.067129	4.62128	-1.89926	1.03739	-1.83081
ENSG00000277914.1	DDX6P2	0.268189	NA	0.324683	1.10785	-1.89868	1.92783	-0.984881
ENSG00000265943.1	AC090912.1	0.268352	0.0758359	0.0170022	9.36183	-1.8978	0.795171	-2.38666
ENSG00000242925.1	PLCH1-AS2	0.268486	NA	0.540762	0.413825	-1.89708	3.10152	-0.611662
ENSG00000286402.1	AC090629.1	0.268486	NA	0.540762	0.413825	-1.89708	3.10152	-0.611662
ENSG00000196131.6	VN1R2	0.268486	NA	0.540762	0.413825	-1.89708	3.10152	-0.611662
ENSG00000222969.1	RN7SKP8	0.268622	NA	0.513773	0.453587	-1.89635	2.90418	-0.652974
ENSG00000274397.1	AL357153.4	0.268647	NA	0.540952	0.41837	-1.89622	3.10156	-0.611375
ENSG00000152969.20	JAKMIP1	0.269131	0.644798	0.400239	75.08	-1.89362	2.25111	-0.841194
ENSG00000256321.6	AC087235.2	0.26927	7.55485e-05	3.02519e-06	62.1766	-1.89287	0.405404	-4.6691
ENSG00000012223.13	LTF	0.269298	NA	0.54172	0.418128	-1.89272	3.10174	-0.610214
ENSG00000216636.1	RPL7P25	0.269417	NA	0.297097	0.775907	-1.89209	1.81464	-1.04268
ENSG00000242068.1	AC108734.3	0.269681	NA	0.191901	1.15599	-1.89067	1.44882	-1.30498
ENSG00000255002.2	LINC02324	0.269795	NA	0.410559	2.71761	-1.89006	2.2968	-0.82291
ENSG00000129673.9	AANAT	0.269901	NA	0.22534	2.85145	-1.8895	1.55841	-1.21245
ENSG00000234022.1	AC008278.2	0.269929	NA	0.435053	1.09231	-1.88935	2.42045	-0.780575
ENSG00000116824.5	CD2	0.270067	NA	0.542626	0.42937	-1.88861	3.10195	-0.608847
ENSG00000234891.1	Z82196.1	0.270067	NA	0.542626	0.42937	-1.88861	3.10195	-0.608847
ENSG00000253311.3	LINC01847	0.270067	NA	0.542626	0.42937	-1.88861	3.10195	-0.608847
ENSG00000248995.2	LINC02231	0.270067	NA	0.542626	0.42937	-1.88861	3.10195	-0.608847
ENSG00000216921.8	FAM240C	0.270092	NA	0.179749	1.63636	-1.88848	1.40771	-1.34153
ENSG00000230935.1	RPS3P1	0.270252	NA	0.542843	0.433915	-1.88763	3.102	-0.608519
ENSG00000273398.6	AC017083.3	0.270857	0.297736	0.116469	14.8598	-1.8844	1.20043	-1.56977
ENSG00000129450.8	SIGLEC9	0.270867	NA	0.315153	1.89046	-1.88434	1.87596	-1.00447
ENSG00000228814.4	AC017007.2	0.270943	NA	0.208045	1.28671	-1.88394	1.49642	-1.25896
ENSG00000236253.7	SLC25A3P1	0.270944	NA	NA	16.5662	-1.88394	1.35849	-1.38679
ENSG00000276626.1	AC022336.3	0.271019	NA	0.33598	0.786163	-1.88354	1.95765	-0.962139
ENSG00000227947.2	LINC01738	0.271178	NA	0.173901	3.08605	-1.88269	1.38456	-1.35977
ENSG00000236508.1	ATP13A5-AS1	0.271241	NA	0.426092	1.82946	-1.88235	2.36507	-0.795897
ENSG00000285122.1	PIGY-DT	0.271279	NA	0.22768	1.51139	-1.88215	1.56019	-1.20636
ENSG00000152785.7	BMP3	0.271561	4.49836e-09	3.54773e-11	528.861	-1.88065	0.284008	-6.62183
ENSG00000285871.1	AL359844.1	0.271591	0.410706	0.190799	3.24069	-1.8805	1.43745	-1.30822
ENSG00000274505.1	AC007613.2	0.271665	NA	0.379666	0.7995	-1.8801	2.14009	-0.878512
ENSG00000258841.1	EEF1A1P2	0.271811	NA	0.296297	0.799051	-1.87932	1.79941	-1.04441
ENSG00000220517.2	ASS1P1	0.272136	NA	0.261715	1.15964	-1.8776	1.67293	-1.12235
ENSG00000183671.12	GPR1	0.272532	0.000338331	1.85724e-05	53.5249	-1.8755	0.438059	-4.2814
ENSG00000231590.2	AC235565.1	0.272663	NA	0.507896	0.426018	-1.87481	2.83153	-0.662118
ENSG00000283175.1	AC007920.2	0.272898	0.00547178	0.000570423	15.0017	-1.87357	0.543803	-3.4453
ENSG00000260422.1	Z97205.2	0.273215	NA	0.0864995	2.75014	-1.87189	1.09202	-1.71416
ENSG00000277556.1	OR13C5	0.273305	NA	0.363065	0.734601	-1.87142	2.05754	-0.90954
ENSG00000213750.4	AP002982.1	0.273441	NA	0.281039	1.08296	-1.8707	1.73536	-1.07799
ENSG00000284728.1	AF228730.6	0.273526	NA	0.524271	0.429155	-1.87025	2.93706	-0.636776
ENSG00000242525.1	OR7E100P	0.27442	NA	0.547718	0.408608	-1.86554	3.10312	-0.601183
ENSG00000285900.1	AC079177.1	0.274441	NA	0.361459	1.4844	-1.86543	2.04411	-0.912588
ENSG00000279090.1	AP000843.1	0.274646	NA	0.456124	1.11211	-1.86436	2.50167	-0.745244
ENSG00000255655.1	AC007570.1	0.274763	NA	0.438688	1.50189	-1.86374	2.40665	-0.774411
ENSG00000236939.2	BAALC-AS2	0.274778	NA	0.324527	1.48039	-1.86366	1.89167	-0.985198
ENSG00000261396.1	AC027682.5	0.275039	NA	0.50994	0.418865	-1.86229	2.82623	-0.658931
ENSG00000187821.8	HELT	0.275067	0.18467	0.0575691	7.15302	-1.86214	0.98061	-1.89897
ENSG00000185942.11	NKAIN3	0.275118	2.96328e-07	4.24354e-09	128.587	-1.86188	0.316947	-5.87441
ENSG00000258473.2	AC007686.2	0.275128	NA	0.514283	0.434867	-1.86182	2.85475	-0.652184
ENSG00000216368.2	AL136226.1	0.275304	NA	0.211704	1.16084	-1.8609	1.49004	-1.24889
ENSG00000269136.1	BRI3BPP1	0.275607	NA	0.508281	0.41985	-1.85931	2.81068	-0.661516
ENSG00000228195.2	RPL5P27	0.275999	NA	0.549552	0.429121	-1.85726	3.10355	-0.598432
ENSG00000256609.1	AC084880.3	0.275999	NA	0.549552	0.429121	-1.85726	3.10355	-0.598432
ENSG00000266820.1	KPNA2P3	0.276147	0.385132	0.17338	7.83008	-1.85649	1.36364	-1.36142
ENSG00000236646.1	LAMTOR5P1	0.27618	NA	0.528118	0.424395	-1.85632	2.94242	-0.630882
ENSG00000233535.1	AC003035.2	0.276854	NA	0.442649	1.47971	-1.8528	2.41336	-0.767728
ENSG00000258578.2	AC008015.1	0.277057	NA	0.550775	0.440363	-1.85175	3.10384	-0.596599
ENSG00000196772.4	OR14A16	0.277057	NA	0.550775	0.440363	-1.85175	3.10384	-0.596599
ENSG00000276204.1	BX005195.1	0.277057	NA	0.550775	0.440363	-1.85175	3.10384	-0.596599
ENSG00000207347.1	RNU6-306P	0.277057	NA	0.550775	0.440363	-1.85175	3.10384	-0.596599
ENSG00000234200.2	AC243591.1	0.277337	NA	0.287836	1.13733	-1.85029	1.74082	-1.06288
ENSG00000169760.17	NLGN1	0.277467	7.55774e-10	4.44334e-12	3373.27	-1.84961	0.267196	-6.92231
ENSG00000240882.1	AC063952.2	0.277597	NA	0.102587	2.73052	-1.84893	1.13262	-1.63244
ENSG00000258512.1	LINC00239	0.278082	NA	0.551957	0.41509	-1.84642	3.10411	-0.59483
ENSG00000254115.1	AC090572.3	0.278082	NA	0.551957	0.41509	-1.84642	3.10411	-0.59483
ENSG00000174678.9	FAM47DP	0.278082	NA	0.551957	0.41509	-1.84642	3.10411	-0.59483
ENSG00000260390.1	AL360014.1	0.278082	NA	0.551957	0.41509	-1.84642	3.10411	-0.59483
ENSG00000258563.2	PSMA3P	0.278082	NA	0.551957	0.41509	-1.84642	3.10411	-0.59483
ENSG00000224904.1	SBF1P2	0.278375	NA	0.552294	0.419635	-1.8449	3.10419	-0.594326
ENSG00000251785.1	RNA5SP20	0.278375	NA	0.552294	0.419635	-1.8449	3.10419	-0.594326
ENSG00000100336.17	APOL4	0.278492	6.21065e-05	2.3912e-06	66.4703	-1.84429	0.390972	-4.71719
ENSG00000181577.16	C6orf223	0.278584	0.000122849	5.46534e-06	27.4664	-1.84381	0.405583	-4.54608
ENSG00000100604.13	CHGA	0.278714	6.0584e-06	1.46818e-07	401.381	-1.84314	0.35064	-5.25651
ENSG00000258352.1	IFITM3P6	0.278781	NA	0.194665	1.63501	-1.8428	1.42092	-1.2969
ENSG00000196748.10	CLPSL2	0.278995	NA	0.437449	1.44035	-1.84169	2.37176	-0.776508
ENSG00000229896.2	AL157373.2	0.279047	0.00545919	0.000568718	12.2628	-1.84142	0.534348	-3.44611
ENSG00000277769.1	RBM22P4	0.279056	NA	0.495854	0.796613	-1.84138	2.70382	-0.681027
ENSG00000226247.1	SUPT4H1P1	0.279098	NA	0.246453	1.20976	-1.84115	1.58856	-1.15901
ENSG00000242441.8	GTF2A1L	0.279287	0.382301	0.17128	11.9849	-1.84018	1.34506	-1.3681
ENSG00000215441.3	CTAGE12P	0.279531	NA	0.167867	1.82963	-1.83892	1.33343	-1.37909
ENSG00000175604.2	AC007601.1	0.279542	NA	0.242003	1.76799	-1.83886	1.57168	-1.17
ENSG00000102239.5	BRS3	0.279634	0.330573	0.136542	4.08529	-1.83839	1.23482	-1.48879
ENSG00000267280.5	TBX2-AS1	0.279934	0.0607276	0.0126081	16.9688	-1.83684	0.736313	-2.49465
ENSG00000243141.2	RPL23AP66	0.27994	NA	0.219347	1.19934	-1.83681	1.49545	-1.22827
ENSG00000224218.1	AC107072.1	0.279943	NA	0.554096	0.435603	-1.83679	3.10461	-0.591634
ENSG00000204173.11	LRRC37A5P	0.27998	0.18864	0.0592935	3.20978	-1.8366	0.973804	-1.88601
ENSG00000235071.1	AC073909.1	0.280058	NA	0.174649	2.3251	-1.8362	1.35272	-1.35742
ENSG00000241334.2	RPL35AP33	0.280285	NA	0.306835	0.777508	-1.83503	1.79573	-1.02189
ENSG00000224265.1	LINC02633	0.280294	NA	0.554498	0.386751	-1.83499	3.10471	-0.591034
ENSG00000234139.4	AL035420.1	0.280294	NA	0.554498	0.386751	-1.83499	3.10471	-0.591034
ENSG00000111783.12	RFX4	0.28043	0.000879417	5.97102e-05	488.409	-1.83429	0.456978	-4.01395
ENSG00000215802.3	RFKP1	0.280531	NA	0.522139	0.425346	-1.83377	2.86503	-0.640052
ENSG00000198704.9	GPX6	0.280536	NA	0.220815	1.89651	-1.83374	1.49771	-1.22436
ENSG00000215006.4	CHCHD2P2	0.280623	NA	0.0795535	2.4244	-1.83329	1.04564	-1.75328
ENSG00000235924.1	ZNRF2P3	0.280863	NA	0.516332	0.402538	-1.83206	2.82285	-0.64901
ENSG00000250674.1	AC136628.1	0.280868	NA	0.551913	0.736524	-1.83203	3.07959	-0.594895
ENSG00000286981.1	AL731553.1	0.280912	NA	0.555206	0.395841	-1.83181	3.10488	-0.589978
ENSG00000254417.1	LINC02584	0.280912	NA	0.555206	0.395841	-1.83181	3.10488	-0.589978
ENSG00000234177.5	LINC01114	0.280912	NA	0.555206	0.395841	-1.83181	3.10488	-0.589978
ENSG00000287602.1	AC100808.1	0.280912	NA	0.555206	0.395841	-1.83181	3.10488	-0.589978
ENSG00000226488.2	LINC01824	0.280912	NA	0.555206	0.395841	-1.83181	3.10488	-0.589978
ENSG00000226308.1	AL122058.1	0.280963	NA	0.224991	2.72718	-1.83155	1.50948	-1.21336
ENSG00000231528.3	FAM225A	0.281035	0.0415294	0.00761212	21.6407	-1.83118	0.686141	-2.66881
ENSG00000287424.1	AC080079.2	0.281322	0.00205813	0.000169992	37.063	-1.8297	0.486638	-3.75988
ENSG00000183346.7	CABCOCO1	0.281408	6.47709e-07	1.0472e-08	59.1005	-1.82926	0.319639	-5.7229
ENSG00000283132.1	AC006453.2	0.281584	NA	0.321609	2.88005	-1.82836	1.84467	-0.991156
ENSG00000105428.6	ZNRF4	0.281587	NA	0.266367	1.7619	-1.82835	1.64498	-1.11147
ENSG00000226101.2	LINC02097	0.281671	0.203023	0.0660832	5.73983	-1.82792	0.994592	-1.83786
ENSG00000234091.1	AL157392.2	0.281727	NA	0.515328	0.40469	-1.82763	2.8093	-0.650564
ENSG00000180061.10	TMEM150B	0.281945	NA	0.556385	0.400145	-1.82651	3.10515	-0.58822
ENSG00000171014.2	OR4D5	0.281945	NA	0.556385	0.400145	-1.82651	3.10515	-0.58822
ENSG00000260252.1	AC009087.1	0.28198	NA	0.209385	1.1631	-1.82634	1.45495	-1.25526
ENSG00000273407.1	AC069294.1	0.282077	NA	0.142909	1.63458	-1.82584	1.24627	-1.46504
ENSG00000057593.14	F7	0.282349	1.54984e-06	2.96133e-08	58.8044	-1.82445	0.329103	-5.54371
ENSG00000187848.15	P2RX2	0.282354	9.42357e-07	1.63038e-08	130.347	-1.82443	0.323065	-5.64725
ENSG00000187595.16	ZNF385C	0.282573	1.34384e-08	1.22846e-10	846.163	-1.8233	0.283307	-6.43577
ENSG00000240051.1	RPL23AP10	0.282709	NA	0.177503	2.16571	-1.82261	1.3516	-1.34848
ENSG00000256540.1	AC007406.3	0.282806	NA	0.275532	1.24716	-1.82212	1.67103	-1.09041
ENSG00000244018.1	RPL35P6	0.282849	NA	0.210794	1.24405	-1.8219	1.45591	-1.25138
ENSG00000224530.1	PPIAP10	0.282882	NA	0.528495	0.409235	-1.82173	2.89023	-0.630306
ENSG00000248599.2	AC018781.1	0.282939	NA	0.233555	2.79295	-1.82144	1.52901	-1.19125
ENSG00000228151.1	AC004941.1	0.283154	NA	0.331319	2.27599	-1.82034	1.87382	-0.97146
ENSG00000267760.1	AC011478.1	0.28318	NA	0.557791	0.411387	-1.82021	3.10549	-0.586126
ENSG00000256637.7	LINC01965	0.28318	NA	0.557791	0.411387	-1.82021	3.10549	-0.586126
ENSG00000277308.1	AL359385.2	0.28318	NA	0.557791	0.411387	-1.82021	3.10549	-0.586126
ENSG00000235975.1	Z83313.1	0.28318	NA	0.557791	0.411387	-1.82021	3.10549	-0.586126
ENSG00000259482.2	RORA-AS2	0.28318	NA	0.557791	0.411387	-1.82021	3.10549	-0.586126
ENSG00000231953.2	AL031432.1	0.28318	NA	0.557791	0.411387	-1.82021	3.10549	-0.586126
ENSG00000146666.5	LINC00525	0.28318	NA	0.557791	0.411387	-1.82021	3.10549	-0.586126
ENSG00000199535.1	RNA5SP305	0.28318	NA	0.557791	0.411387	-1.82021	3.10549	-0.586126
ENSG00000232144.1	PSAT1P2	0.28318	NA	0.557791	0.411387	-1.82021	3.10549	-0.586126
ENSG00000267594.5	CYP4F24P	0.283424	0.353105	0.151166	14.3419	-1.81897	1.2672	-1.43542
ENSG00000274455.1	AC092278.1	0.283876	NA	0.522666	0.398944	-1.81667	2.84191	-0.639242
ENSG00000167851.15	CD300A	0.284351	0.00645205	0.000705458	32.2255	-1.81426	0.535582	-3.38745
ENSG00000283031.2	AC009242.1	0.284539	0.0708471	0.0155333	5.95517	-1.8133	0.749391	-2.4197
ENSG00000253395.1	AP003469.2	0.285	NA	0.460714	1.07511	-1.81097	2.45498	-0.737672
ENSG00000229221.1	HNRNPA1P66	0.285124	NA	0.304778	1.1939	-1.81034	1.76405	-1.02624
ENSG00000173557.15	FAM166C	0.285741	NA	0.451316	1.23247	-1.80722	2.39932	-0.753222
ENSG00000143546.10	S100A8	0.285865	6.97361e-05	2.73495e-06	3242.92	-1.80659	0.385219	-4.68978
ENSG00000223495.2	AC239859.2	0.285962	NA	0.352941	1.02859	-1.80611	1.94435	-0.9289
ENSG00000188517.16	COL25A1	0.285996	2.08888e-08	1.99939e-10	3603.02	-1.80593	0.283889	-6.36139
ENSG00000248305.1	AC105416.1	0.286188	NA	0.503169	0.773133	-1.80496	2.69594	-0.669512
ENSG00000229820.2	CR391992.1	0.28647	NA	0.217032	2.5426	-1.80355	1.461	-1.23446
ENSG00000235115.3	CHCHD2P8	0.286491	NA	0.264285	0.79838	-1.80344	1.61552	-1.11632
ENSG00000259874.1	AC034105.2	0.286645	NA	0.527181	0.406626	-1.80266	2.85089	-0.632316
ENSG00000140623.14	SEPTIN12	0.286658	NA	0.432998	1.76275	-1.8026	2.29902	-0.784072
ENSG00000182631.7	RXFP3	0.287029	0.155226	0.0449401	3.9069	-1.80073	0.898026	-2.00521
ENSG00000175745.14	NR2F1	0.287182	2.55701e-07	3.61162e-09	1907.61	-1.79996	0.305023	-5.90107
ENSG00000106153.13	CHCHD2	0.287436	2.21791e-05	6.99682e-07	2830.96	-1.79869	0.362533	-4.96145
ENSG00000287767.1	AC233976.2	0.287562	NA	0.349982	1.84624	-1.79805	1.92383	-0.934624
ENSG00000161905.13	ALOX15	0.287802	1.66602e-05	5.00493e-07	813.46	-1.79685	0.357502	-5.02612
ENSG00000106483.12	SFRP4	0.288394	0.0169849	0.00238867	15.7445	-1.79388	0.590657	-3.0371
ENSG00000164334.15	FAM170A	0.288461	NA	0.277396	1.4893	-1.79355	1.65124	-1.08619
ENSG00000226205.1	RPS3AP27	0.288715	NA	0.378523	1.10587	-1.79228	2.03525	-0.880622
ENSG00000261722.1	AC092376.1	0.288744	0.202945	0.0660008	4.33315	-1.79214	0.974824	-1.83842
ENSG00000285547.1	AL133500.1	0.288901	0.264515	0.0973665	17.5699	-1.79135	1.08059	-1.65776
ENSG00000161649.13	CD300LG	0.288903	NA	0.140077	2.62581	-1.79134	1.21406	-1.4755
ENSG00000203908.4	KHDC3L	0.288904	0.199599	0.0644484	6.42065	-1.79134	0.968779	-1.84907
ENSG00000271339.1	AL683813.3	0.289185	NA	0.530902	0.401866	-1.78994	2.85645	-0.626629
ENSG00000225725.4	FAM66E	0.289391	0.0676044	0.0145339	6.46821	-1.78891	0.732022	-2.44379
ENSG00000215057.4	PKMP5	0.289418	NA	0.148832	1.62945	-1.78877	1.23904	-1.44367
ENSG00000286998.1	AC103974.2	0.289452	0.14689	0.0416618	4.31624	-1.7886	0.878109	-2.03688
ENSG00000218631.1	AL117344.1	0.289782	0.2189	0.0739146	3.1796	-1.78696	0.9999	-1.78714
ENSG00000196358.11	NTNG2	0.290101	4.33599e-06	9.88597e-08	251.079	-1.78537	0.335042	-5.32881
ENSG00000271911.1	AL357054.3	0.290475	0.123829	0.0327785	7.39691	-1.78351	0.835453	-2.13479
ENSG00000184984.10	CHRM5	0.290708	0.269562	0.100239	14.736	-1.78236	1.08436	-1.6437
ENSG00000228139.1	LINC01402	0.291201	NA	0.171343	2.63448	-1.77991	1.3012	-1.3679
ENSG00000287479.1	AP001330.5	0.291326	NA	0.56691	0.397106	-1.77929	3.10734	-0.572609
ENSG00000233515.2	LINC01518	0.291326	NA	0.56691	0.397106	-1.77929	3.10734	-0.572609
ENSG00000222405.1	RNU4-65P	0.291326	NA	0.56691	0.397106	-1.77929	3.10734	-0.572609
ENSG00000287581.1	AC016549.1	0.291326	NA	0.56691	0.397106	-1.77929	3.10734	-0.572609
ENSG00000249601.2	LINC01187	0.291326	NA	0.56691	0.397106	-1.77929	3.10734	-0.572609
ENSG00000243916.1	AC092183.1	0.291326	NA	0.56691	0.397106	-1.77929	3.10734	-0.572609
ENSG00000136286.16	MYO1G	0.291465	0.588499	0.340855	4.08564	-1.7786	1.86735	-0.952476
ENSG00000080572.13	PIH1D3	0.291515	0.331646	0.137271	4.07128	-1.77836	1.19672	-1.48603
ENSG00000215475.5	SIAH3	0.291633	0.0214768	0.00325521	71.7872	-1.77777	0.604161	-2.94255
ENSG00000273149.1	AL138963.4	0.291925	NA	0.56757	0.359677	-1.77633	3.10746	-0.571634
ENSG00000250673.2	REELD1	0.291925	NA	0.56757	0.359677	-1.77633	3.10746	-0.571634
ENSG00000288563.1	AC097478.4	0.291925	NA	0.56757	0.359677	-1.77633	3.10746	-0.571634
ENSG00000282299.1	AC073488.5	0.291932	NA	0.139461	1.83627	-1.77629	1.20199	-1.4778
ENSG00000286953.1	AC122697.1	0.29198	NA	0.364467	1.04242	-1.77606	1.95842	-0.906885
ENSG00000237990.3	CNTN4-AS1	0.292132	0.192177	0.0608947	8.91531	-1.77531	0.947206	-1.87426
ENSG00000258803.1	AL355103.1	0.292625	NA	0.56834	0.411137	-1.77287	3.10759	-0.570498
ENSG00000265128.1	AC016866.2	0.292625	NA	0.56834	0.411137	-1.77287	3.10759	-0.570498
ENSG00000250447.6	LINC02105	0.292625	NA	0.56834	0.411137	-1.77287	3.10759	-0.570498
ENSG00000203411.3	AC113208.1	0.292625	NA	0.56834	0.411137	-1.77287	3.10759	-0.570498
ENSG00000285987.1	AL157886.1	0.292625	NA	0.56834	0.411137	-1.77287	3.10759	-0.570498
ENSG00000255946.1	AC069234.1	0.292653	NA	0.363625	1.21726	-1.77274	1.95132	-0.90848
ENSG00000273297.2	AC009275.1	0.292752	0.019721	0.00291169	15.833	-1.77225	0.595332	-2.97691
ENSG00000273769.5	U52112.1	0.292756	NA	0.568484	0.368767	-1.77223	3.10761	-0.570286
ENSG00000250523.1	AC093909.3	0.292812	NA	0.531209	0.380009	-1.77196	2.82987	-0.626162
ENSG00000235597.2	LINC01102	0.292844	0.00739199	0.000833404	32.5406	-1.77179	0.530246	-3.34146
ENSG00000279675.1	AC080100.1	0.29301	1.21382e-05	3.45896e-07	147.931	-1.77098	0.347485	-5.09655
ENSG00000064989.13	CALCRL	0.293052	7.52095e-08	8.68165e-10	1634.43	-1.77077	0.288779	-6.13194
ENSG00000238272.1	AL139142.1	0.293187	NA	0.568957	0.373312	-1.77011	3.10769	-0.569588
ENSG00000271605.6	MILR1	0.293187	NA	0.568957	0.373312	-1.77011	3.10769	-0.569588
ENSG00000287440.1	AC063919.2	0.293187	NA	0.568957	0.373312	-1.77011	3.10769	-0.569588
ENSG00000253490.5	LINC02099	0.293187	NA	0.568957	0.373312	-1.77011	3.10769	-0.569588
ENSG00000144407.9	PTH2R	0.293324	0.0189944	0.00276169	25.2278	-1.76943	0.591173	-2.99309
ENSG00000273160.1	AL359962.2	0.293367	NA	0.273437	2.022	-1.76922	1.61546	-1.09518
ENSG00000251611.1	FAM160A1-DT	0.293551	0.207686	0.0683624	6.67801	-1.76832	0.970212	-1.82261
ENSG00000267368.1	UPK3BL1	0.293555	0.0101871	0.00124824	125.634	-1.7683	0.547864	-3.22762
ENSG00000287798.1	AC107918.6	0.293629	NA	0.569442	0.377857	-1.76793	3.10778	-0.568874
ENSG00000287006.1	AP003100.3	0.293629	NA	0.569442	0.377857	-1.76793	3.10778	-0.568874
ENSG00000163564.15	PYHIN1	0.293629	NA	0.569442	0.377857	-1.76793	3.10778	-0.568874
ENSG00000235413.3	KRT18P63	0.293974	0.186276	0.0582367	4.71954	-1.76624	0.932588	-1.89391
ENSG00000235024.1	AC097468.2	0.294063	NA	0.276924	1.74373	-1.7658	1.62409	-1.08726
ENSG00000285633.1	AL132633.1	0.294083	NA	0.569939	0.382402	-1.76571	3.10786	-0.568142
ENSG00000263505.1	AP005265.1	0.294083	NA	0.569939	0.382402	-1.76571	3.10786	-0.568142
ENSG00000225964.6	NRIR	0.294083	NA	0.569939	0.382402	-1.76571	3.10786	-0.568142
ENSG00000206066.3	IGLL3P	0.294083	NA	0.569939	0.382402	-1.76571	3.10786	-0.568142
ENSG00000286777.1	AC012301.3	0.294083	NA	0.569939	0.382402	-1.76571	3.10786	-0.568142
ENSG00000270995.1	AL137072.1	0.294083	NA	0.569939	0.382402	-1.76571	3.10786	-0.568142
ENSG00000254647.7	INS	0.294083	NA	0.569939	0.382402	-1.76571	3.10786	-0.568142
ENSG00000188389.11	PDCD1	0.294172	0.027227	0.00443616	8.26088	-1.76527	0.620402	-2.84536
ENSG00000225858.1	BX295541.1	0.294213	NA	0.540815	0.384554	-1.76507	2.88607	-0.611581
ENSG00000250658.1	AC097652.1	0.294224	0.000146366	6.77392e-06	56.0649	-1.76501	0.392167	-4.50067
ENSG00000007372.23	PAX6	0.294397	0.000592101	3.64451e-05	374.829	-1.76417	0.427269	-4.12893
ENSG00000223345.3	H2BP1	0.294434	0.000801729	5.32282e-05	14.7143	-1.76398	0.436524	-4.04098
ENSG00000229211.3	KCTD9P6	0.294557	NA	0.312236	1.06889	-1.76338	1.74499	-1.01054
ENSG00000224613.7	AC095032.1	0.294731	NA	0.337697	2.62152	-1.76253	1.83841	-0.958725
ENSG00000171791.13	BCL2	0.294744	2.4579e-11	7.22524e-14	4300.18	-1.76247	0.235507	-7.48371
ENSG00000251571.1	DDX3P3	0.294769	NA	0.166785	1.67041	-1.76234	1.27465	-1.38261
ENSG00000284380.1	AC006328.2	0.295042	NA	0.536906	0.386706	-1.76101	2.85184	-0.617499
ENSG00000284071.1	AC012005.2	0.295042	NA	0.536906	0.386706	-1.76101	2.85184	-0.617499
ENSG00000115165.10	CYTIP	0.295152	0.214985	0.0719905	6.88241	-1.76047	0.978485	-1.79918
ENSG00000223914.4	LINC02471	0.295255	NA	0.5102	0.715621	-1.75997	2.67259	-0.658526
ENSG00000256783.1	AC079031.1	0.295429	0.437371	0.209944	3.64984	-1.75912	1.40312	-1.25372
ENSG00000227588.2	CNTN4-AS2	0.295438	NA	0.360215	1.81211	-1.75907	1.92258	-0.914956
ENSG00000267503.1	AP005131.3	0.295499	NA	0.433612	0.693517	-1.75878	2.24613	-0.783026
ENSG00000280068.1	AC138965.3	0.295502	NA	0.341874	0.688219	-1.75876	1.85042	-0.950468
ENSG00000174963.17	ZIC4	0.295638	0.000773173	5.09166e-05	638.662	-1.7581	0.43395	-4.05138
ENSG00000243591.3	RN7SL282P	0.295705	NA	0.571712	0.391251	-1.75777	3.10817	-0.565532
ENSG00000258919.1	AL049836.1	0.295705	NA	0.571712	0.391251	-1.75777	3.10817	-0.565532
ENSG00000286542.1	AC124242.3	0.295828	0.327849	0.134696	5.24397	-1.75717	1.17471	-1.49584
ENSG00000255146.1	AP004247.2	0.296297	NA	0.572356	0.393403	-1.75489	3.10828	-0.564584
ENSG00000254826.1	AP001922.3	0.296297	NA	0.572356	0.393403	-1.75489	3.10828	-0.564584
ENSG00000258483.4	LINC02251	0.296297	NA	0.572356	0.393403	-1.75489	3.10828	-0.564584
ENSG00000259405.1	ISCA1P4	0.296459	NA	0.203918	1.79684	-1.75409	1.38067	-1.27047
ENSG00000182463.16	TSHZ2	0.296602	6.99147e-09	5.96512e-11	2553.94	-1.7534	0.267915	-6.54461
ENSG00000231934.2	FAM242A	0.296644	NA	0.368983	1.38022	-1.75319	1.95151	-0.898379
ENSG00000272141.1	AL390719.2	0.296682	0.0107235	0.00133087	30.6301	-1.75301	0.546239	-3.20924
ENSG00000279795.1	AC138907.10	0.29688	NA	0.449988	0.381946	-1.75205	2.31925	-0.755436
ENSG00000166558.10	SLC38A8	0.297053	0.352027	0.150339	3.90137	-1.75121	1.21752	-1.43834
ENSG00000201898.1	AC092809.1	0.297059	NA	0.44474	0.690155	-1.75118	2.29148	-0.764213
ENSG00000231530.1	AL157932.1	0.297222	0.0905958	0.0215293	5.53363	-1.75039	0.761512	-2.29857
ENSG00000162599.17	NFIA	0.297983	5.9167e-09	4.87844e-11	1340.41	-1.7467	0.265674	-6.5746
ENSG00000224761.4	CCNYL4	0.298279	NA	0.141975	2.30551	-1.74527	1.18849	-1.46848
ENSG00000152672.8	CLEC4F	0.298356	NA	0.292096	1.18504	-1.7449	1.65623	-1.05353
ENSG00000282904.2	AC107398.4	0.298525	NA	0.355875	2.19061	-1.74408	1.88905	-0.923255
ENSG00000069011.16	PITX1	0.298627	6.26723e-07	1.00204e-08	3015.47	-1.74358	0.30427	-5.73038
ENSG00000272197.2	RN7SL803P	0.298645	NA	0.559706	0.386491	-1.7435	2.98913	-0.583278
ENSG00000224186.8	C5orf66	0.299057	6.20829e-06	1.50895e-07	149.926	-1.74151	0.331624	-5.25146
ENSG00000232398.1	TMPRSS11CP	0.29928	NA	0.2121	1.76639	-1.74043	1.39479	-1.24781
ENSG00000232390.3	NDUFA5P1	0.299714	NA	0.550387	0.388643	-1.73834	2.91091	-0.597181
ENSG00000201913.1	AC005071.1	0.299969	NA	0.334312	0.766187	-1.73711	1.79925	-0.965466
ENSG00000239322.1	ATP6V1B1-AS1	0.300034	NA	0.576407	0.37264	-1.7368	3.10898	-0.558641
ENSG00000184274.3	LINC00315	0.300034	NA	0.576407	0.37264	-1.7368	3.10898	-0.558641
ENSG00000122852.15	SFTPA1	0.300034	NA	0.576407	0.37264	-1.7368	3.10898	-0.558641
ENSG00000287635.1	AL139381.1	0.300034	NA	0.576407	0.37264	-1.7368	3.10898	-0.558641
ENSG00000227624.2	SNRPEP3	0.300172	NA	0.279915	0.769044	-1.73614	1.60678	-1.08051
ENSG00000207863.1	MIR125B2	0.300195	NA	0.475931	0.412123	-1.73603	2.43529	-0.712862
ENSG00000249283.3	ACTR3BP4	0.300337	NA	0.521112	0.71495	-1.73535	2.70458	-0.641633
ENSG00000174776.11	WDR49	0.300415	1.46889e-06	2.73821e-08	292.74	-1.73497	0.312191	-5.5574
ENSG00000162877.13	PM20D1	0.300784	NA	0.577215	0.376415	-1.7332	3.10912	-0.557457
ENSG00000230393.1	AC092667.1	0.300809	0.101666	0.0250275	7.58806	-1.73308	0.77336	-2.24098
ENSG00000144644.14	GADL1	0.300861	1.92143e-05	5.91687e-07	81.0276	-1.73283	0.346989	-4.99391
ENSG00000272746.1	AP005131.7	0.300871	NA	0.43261	0.745349	-1.73278	2.20812	-0.784733
ENSG00000201782.1	RN7SKP226	0.301162	NA	0.577622	0.381731	-1.73139	3.10919	-0.556862
ENSG00000227964.1	LINC01429	0.301162	NA	0.577622	0.381731	-1.73139	3.10919	-0.556862
ENSG00000241134.3	BET1P1	0.301162	NA	0.577622	0.381731	-1.73139	3.10919	-0.556862
ENSG00000259285.1	AC025431.1	0.301162	NA	0.577622	0.381731	-1.73139	3.10919	-0.556862
ENSG00000243029.3	RN7SL635P	0.301162	NA	0.577622	0.381731	-1.73139	3.10919	-0.556862
ENSG00000239922.2	AC092958.1	0.301326	0.000940418	6.48971e-05	229.306	-1.7306	0.433273	-3.99426
ENSG00000257470.2	AC007656.1	0.301419	NA	0.354348	2.63716	-1.73016	1.86804	-0.926189
ENSG00000222760.1	RNU4-53P	0.301649	NA	0.42381	1.06126	-1.72906	2.16178	-0.799829
ENSG00000127129.10	EDN2	0.302006	0.211629	0.0702902	11.8104	-1.72735	0.95432	-1.81004
ENSG00000213704.3	EEF1A1P15	0.302252	NA	0.363208	0.770732	-1.72617	1.89842	-0.90927
ENSG00000224953.1	SRIP3	0.302252	NA	0.363208	0.770732	-1.72617	1.89842	-0.90927
ENSG00000141668.10	CBLN2	0.302274	8.31586e-05	3.38955e-06	442.743	-1.72607	0.371543	-4.64568
ENSG00000212535.1	RNU6-808P	0.302428	NA	0.554292	0.383882	-1.72533	2.91767	-0.59134
ENSG00000259950.1	AC034105.3	0.302428	NA	0.554292	0.383882	-1.72533	2.91767	-0.59134
ENSG00000232503.1	CYCSP8	0.302468	NA	0.410284	0.677569	-1.72515	2.09516	-0.823394
ENSG00000174495.12	PPIAP80	0.302555	NA	0.414434	1.13446	-1.72473	2.11334	-0.816116
ENSG00000123496.8	IL13RA2	0.302809	0.000115397	5.05933e-06	179.134	-1.72352	0.377774	-4.56231
ENSG00000188641.14	DPYD	0.302942	4.8201e-07	7.43659e-09	450.901	-1.72289	0.298038	-5.78076
ENSG00000223382.5	LINC01778	0.302952	NA	0.360581	2.63208	-1.72284	1.88441	-0.914259
ENSG00000286085.1	AL109653.3	0.302966	0.219761	0.0744012	4.54008	-1.72277	0.965604	-1.78414
ENSG00000267766.1	AC022726.1	0.30319	NA	0.579798	0.39005	-1.72171	3.10957	-0.55368
ENSG00000187122.17	SLIT1	0.303209	0.000117835	5.20849e-06	1848.02	-1.72161	0.377861	-4.55621
ENSG00000233635.2	AC015923.1	0.303588	NA	0.417833	1.03436	-1.71982	2.12274	-0.810186
ENSG00000257336.1	PRELID2P1	0.30408	NA	0.512618	0.687438	-1.71748	2.62304	-0.654766
ENSG00000224174.2	AL137802.1	0.30413	0.553916	0.30729	6.0186	-1.71724	1.68204	-1.02093
ENSG00000230572.5	AC027612.2	0.304249	NA	0.58093	0.341693	-1.71667	3.10977	-0.552026
ENSG00000227338.2	AL139280.1	0.304249	NA	0.58093	0.341693	-1.71667	3.10977	-0.552026
ENSG00000160307.10	S100B	0.304297	2.15503e-05	6.78298e-07	52.753	-1.71645	0.345537	-4.96748
ENSG00000238934.1	AL591806.3	0.304384	NA	0.291588	0.674009	-1.71603	1.62712	-1.05464
ENSG00000242790.1	AC104831.1	0.304474	NA	0.510526	0.649346	-1.71561	2.60723	-0.658018
ENSG00000272516.1	AL158211.4	0.304571	NA	0.227021	2.02409	-1.71515	1.41974	-1.20807
ENSG00000279881.1	AC041040.1	0.304631	NA	0.581338	0.379122	-1.71486	3.10984	-0.551431
ENSG00000280445.1	AL049536.1	0.304631	NA	0.581338	0.379122	-1.71486	3.10984	-0.551431
ENSG00000287486.1	AC114291.2	0.304631	NA	0.581338	0.379122	-1.71486	3.10984	-0.551431
ENSG00000239696.3	AC092104.1	0.304706	NA	0.299637	1.10625	-1.71451	1.653	-1.03721
ENSG00000107742.13	SPOCK2	0.304819	2.15093e-06	4.33526e-08	1524.95	-1.71397	0.312962	-5.47662
ENSG00000145945.7	FAM50B	0.304892	3.29868e-09	2.45967e-11	87.4831	-1.71363	0.256695	-6.67575
ENSG00000280135.1	AL096816.1	0.305216	0.0977935	0.0237913	13.1683	-1.7121	0.757404	-2.26048
ENSG00000226430.7	USP17L7	0.305346	NA	0.578939	0.666013	-1.71148	3.08411	-0.554936
ENSG00000257443.1	AC068305.2	0.305379	NA	0.200275	2.8246	-1.71133	1.33617	-1.28077
ENSG00000248150.1	LINC02150	0.305452	NA	0.582212	0.350783	-1.71098	3.10999	-0.550156
ENSG00000227368.1	CDK8P2	0.305868	NA	0.517129	0.661986	-1.70902	2.63828	-0.647778
ENSG00000213121.2	AL590867.1	0.305936	NA	0.512164	0.695244	-1.7087	2.60682	-0.655472
ENSG00000223542.1	AL024497.1	0.305987	NA	0.582782	0.398899	-1.70846	3.11009	-0.549326
ENSG00000222268.1	RNA5SP425	0.305987	NA	0.582782	0.398899	-1.70846	3.11009	-0.549326
ENSG00000227573.2	AC004986.1	0.305987	NA	0.582782	0.398899	-1.70846	3.11009	-0.549326
ENSG00000226286.1	AL008733.1	0.306079	NA	0.582879	0.355328	-1.70802	3.11011	-0.549184
ENSG00000238043.1	AC024559.1	0.306079	NA	0.582879	0.355328	-1.70802	3.11011	-0.549184
ENSG00000271414.1	AC093107.2	0.306157	NA	0.311898	1.31969	-1.70766	1.68866	-1.01125
ENSG00000198739.11	LRRTM3	0.306297	5.50535e-05	2.05649e-06	235.481	-1.707	0.359535	-4.74779
ENSG00000270269.1	IMMP1LP1	0.306388	0.290315	0.112036	3.32146	-1.70657	1.07392	-1.58911
ENSG00000134121.10	CHL1	0.306446	0.000166954	7.98412e-06	1481.31	-1.7063	0.382097	-4.46561
ENSG00000268629.8	TEX13A	0.306724	NA	0.583564	0.359873	-1.70499	3.11023	-0.548186
ENSG00000224965.1	LINC02586	0.306724	NA	0.583564	0.359873	-1.70499	3.11023	-0.548186
ENSG00000226983.3	LINC01692	0.306724	NA	0.583564	0.359873	-1.70499	3.11023	-0.548186
ENSG00000286119.1	AC114798.1	0.306724	NA	0.583564	0.359873	-1.70499	3.11023	-0.548186
ENSG00000151812.15	SLC35F4	0.306962	0.00256232	0.000224312	69.1679	-1.70387	0.461761	-3.68993
ENSG00000254748.1	HNRNPCP8	0.307262	NA	0.478001	1.32557	-1.70246	2.39945	-0.709522
ENSG00000258316.1	KLF17P1	0.307379	NA	0.381481	1.10738	-1.70191	1.94466	-0.875171
ENSG00000281097.1	LINC01395	0.307683	0.258884	0.0941522	10.942	-1.70048	1.01589	-1.67389
ENSG00000272904.1	AL390726.2	0.307811	NA	0.22545	2.34429	-1.69988	1.40235	-1.21216
ENSG00000228779.1	Z69666.1	0.307948	0.320438	0.130025	3.21236	-1.69924	1.12235	-1.51401
ENSG00000227935.1	AL390243.1	0.308098	NA	0.585019	0.364177	-1.69854	3.11049	-0.546068
ENSG00000173302.5	GPR148	0.308098	NA	0.585019	0.364177	-1.69854	3.11049	-0.546068
ENSG00000241825.2	RPL7P42	0.308098	NA	0.585019	0.364177	-1.69854	3.11049	-0.546068
ENSG00000231546.1	RPL3P5	0.308265	NA	0.272016	1.07178	-1.69776	1.54562	-1.09843
ENSG00000249635.1	AC109361.1	0.30832	0.379694	0.169039	6.68345	-1.6975	1.23428	-1.3753
ENSG00000249460.2	LINC02500	0.308423	0.370456	0.1627	4.24703	-1.69702	1.21559	-1.39605
ENSG00000230804.2	C2orf27AP3	0.308616	NA	0.229243	1.08862	-1.69612	1.41072	-1.20231
ENSG00000225922.1	RPL21P92	0.308729	NA	0.464124	0.674333	-1.69559	2.31615	-0.732074
ENSG00000189316.3	AC073349.1	0.308827	NA	0.367459	2.95048	-1.69513	1.88088	-0.901243
ENSG00000208032.1	MIR548A3	0.308923	NA	0.559315	0.368722	-1.69468	2.90256	-0.583859
ENSG00000236764.4	COX7A2P2	0.309223	NA	0.281708	1.06969	-1.69328	1.57297	-1.07649
ENSG00000188452.14	CERKL	0.30927	0.0264024	0.00425041	42.6485	-1.69306	0.592197	-2.85895
ENSG00000241131.2	LINC02032	0.309405	0.17292	0.0525039	8.23268	-1.69243	0.872848	-1.93898
ENSG00000168658.19	VWA3B	0.309416	1.3451e-05	3.901e-07	34.3339	-1.69238	0.333557	-5.07373
ENSG00000232268.6	OR52I1	0.309631	NA	0.386905	0.976579	-1.69138	1.9548	-0.865243
ENSG00000180279.7	LINC01869	0.309954	NA	0.286038	1.75176	-1.68987	1.58398	-1.06685
ENSG00000225279.2	AL121987.1	0.310168	0.132242	0.0359678	10.6154	-1.68888	0.805266	-2.09729
ENSG00000172554.12	SNTG2	0.310236	2.52819e-06	5.2748e-08	133.393	-1.68856	0.310295	-5.44179
ENSG00000261708.1	DNM1P32	0.310247	NA	0.353201	0.753212	-1.68851	1.81874	-0.928398
ENSG00000237738.1	RNF216-IT1	0.310249	NA	0.587287	0.375419	-1.6885	3.11089	-0.542771
ENSG00000261438.1	AL157394.1	0.310682	0.364101	0.158353	4.52197	-1.68649	1.19556	-1.41063
ENSG00000182674.6	KCNB2	0.310918	6.80933e-05	2.65099e-06	285.629	-1.68539	0.358888	-4.69616
ENSG00000256694.1	AC026369.2	0.311003	NA	0.349255	1.02967	-1.685	1.80014	-0.936035
ENSG00000207497.1	AC104805.1	0.311318	NA	0.446947	0.72302	-1.68354	2.21369	-0.760514
ENSG00000255343.1	AC234917.1	0.311322	NA	0.504336	0.689721	-1.68352	2.52143	-0.667683
ENSG00000230913.1	NPM1P51	0.311521	NA	0.344821	0.714251	-1.6826	1.78112	-0.944683
ENSG00000228835.1	AC012123.1	0.311523	9.11696e-05	3.80758e-06	33.7523	-1.68259	0.364069	-4.62162
ENSG00000163288.14	GABRB1	0.311664	5.01165e-05	1.85051e-06	63.2257	-1.68194	0.352674	-4.7691
ENSG00000150275.18	PCDH15	0.311741	2.29692e-15	1.48215e-18	352.572	-1.68158	0.191284	-8.79102
ENSG00000249487.7	LINC01586	0.311805	0.00469337	0.000468941	24.7191	-1.68128	0.480656	-3.4979
ENSG00000233133.1	AC104451.1	0.311898	NA	0.254798	1.07801	-1.68085	1.47602	-1.13877
ENSG00000257534.1	AC023794.6	0.311935	NA	0.108577	2.28434	-1.68068	1.0474	-1.60462
ENSG00000285841.1	AC005692.3	0.312069	NA	0.344087	1.04427	-1.68006	1.77574	-0.94612
ENSG00000277774.1	RN7SL763P	0.312121	NA	0.35559	0.748452	-1.67982	1.81838	-0.923802
ENSG00000275230.1	RN7SL544P	0.312121	NA	0.35559	0.748452	-1.67982	1.81838	-0.923802
ENSG00000223403.6	MEG9	0.312464	0.203841	0.0664611	10.4099	-1.67824	0.914422	-1.8353
ENSG00000261043.5	AC019294.3	0.312886	NA	0.339757	1.21612	-1.67629	1.75593	-0.954645
ENSG00000101938.15	CHRDL1	0.312934	2.09807e-07	2.84306e-09	1346.82	-1.67607	0.282147	-5.94041
ENSG00000200312.1	RN7SKP255	0.313156	NA	0.235141	1.19321	-1.67504	1.4109	-1.18722
ENSG00000180209.12	MYLPF	0.31316	0.0934497	0.0224085	7.06922	-1.67503	0.733577	-2.28337
ENSG00000201435.1	RNU4-24P	0.313183	NA	0.442814	0.7147	-1.67492	2.18245	-0.767451
ENSG00000278011.1	AC024941.1	0.313322	NA	0.214451	1.77368	-1.67428	1.34869	-1.24142
ENSG00000274956.2	NKAIN3-IT1	0.313409	4.41867e-08	4.76795e-10	1289.17	-1.67388	0.26883	-6.22656
ENSG00000255108.1	AP006621.1	0.313584	NA	0.438779	0.647706	-1.67308	2.16088	-0.774257
ENSG00000204850.4	AC011484.1	0.313778	0.405195	0.186893	3.194	-1.67219	1.26697	-1.31983
ENSG00000239953.3	RN7SL273P	0.313799	NA	0.578092	0.370659	-1.67209	3.00641	-0.556174
ENSG00000234030.1	TMEM97P1	0.313799	NA	0.578092	0.370659	-1.67209	3.00641	-0.556174
ENSG00000248753.1	AC008406.2	0.313799	NA	0.578092	0.370659	-1.67209	3.00641	-0.556174
ENSG00000163064.7	EN1	0.313959	0.040177	0.00728119	34.8035	-1.67135	0.622778	-2.6837
ENSG00000266978.1	AC011511.2	0.313979	NA	0.312896	1.98181	-1.67126	1.65608	-1.00916
ENSG00000252973.1	RNU6-1028P	0.314041	NA	0.481616	0.387442	-1.67097	2.37453	-0.703706
ENSG00000267044.1	AC005757.1	0.314151	NA	0.42944	0.659585	-1.67047	2.11411	-0.790151
ENSG00000186466.5	AQP7P1	0.314221	NA	0.270062	2.49802	-1.67015	1.5143	-1.10292
ENSG00000085265.11	FCN1	0.314339	NA	0.485882	1.70403	-1.66961	2.39585	-0.696874
ENSG00000252917.1	AC079684.1	0.314412	NA	0.591644	0.389379	-1.66927	3.11167	-0.536455
ENSG00000222445.1	RN7SKP56	0.314412	NA	0.591644	0.389379	-1.66927	3.11167	-0.536455
ENSG00000275014.1	RN7SL166P	0.314412	NA	0.591644	0.389379	-1.66927	3.11167	-0.536455
ENSG00000230609.1	AL513185.3	0.314412	NA	0.591644	0.389379	-1.66927	3.11167	-0.536455
ENSG00000207612.1	MIR604	0.314412	NA	0.591644	0.389379	-1.66927	3.11167	-0.536455
ENSG00000169432.18	SCN9A	0.314614	1.46246e-05	4.31476e-07	1384.51	-1.66834	0.33007	-5.05452
ENSG00000258548.6	LINC00645	0.314785	0.0227047	0.0035105	19.8161	-1.66756	0.57126	-2.91909
ENSG00000271615.1	ACTG1P22	0.314926	NA	0.409171	0.99667	-1.66692	2.01964	-0.825354
ENSG00000277745.1	H2AB3	0.315069	NA	0.338156	0.984459	-1.66626	1.73964	-0.957816
ENSG00000249203.2	LINC02224	0.315179	0.0190034	0.00276451	12.9956	-1.66576	0.556593	-2.99278
ENSG00000228372.8	SMIM10L2B-AS1	0.315247	NA	0.398403	1.33413	-1.66544	1.97216	-0.844478
ENSG00000243020.1	RPL7P39	0.315521	NA	0.515569	1.12937	-1.66419	2.55955	-0.65019
ENSG00000283047.1	FRG1FP	0.315585	0.384665	0.172924	7.38761	-1.6639	1.22088	-1.36287
ENSG00000234144.1	COX6CP13	0.3156	NA	0.327328	0.999278	-1.66383	1.69864	-0.979509
ENSG00000196353.11	CPNE4	0.315668	1.6569e-07	2.13238e-09	416.982	-1.66352	0.277837	-5.98739
ENSG00000278905.1	AC106818.1	0.315862	NA	0.178628	2.558	-1.66263	1.23617	-1.34499
ENSG00000206913.1	AP000577.1	0.315949	NA	0.264499	1.44756	-1.66224	1.4897	-1.11582
ENSG00000273853.1	AC023158.2	0.316121	0.0211462	0.00318994	16.014	-1.66145	0.563429	-2.94882
ENSG00000006611.16	USH1C	0.316154	0.000101998	4.3293e-06	103.432	-1.6613	0.361552	-4.59491
ENSG00000228819.1	AL049792.1	0.316369	NA	0.414289	0.99191	-1.66032	2.03379	-0.816369
ENSG00000242586.1	AC108740.1	0.316432	NA	0.117513	2.12023	-1.66003	1.06052	-1.5653
ENSG00000266202.1	AC005697.1	0.316567	NA	0.161013	2.28855	-1.65942	1.18389	-1.40167
ENSG00000276601.1	AC025521.2	0.316805	NA	0.58214	0.365899	-1.65833	3.01372	-0.550261
ENSG00000267762.1	AC048380.1	0.316805	NA	0.58214	0.365899	-1.65833	3.01372	-0.550261
ENSG00000107249.23	GLIS3	0.316901	3.05542e-11	9.52935e-14	2632.25	-1.6579	0.222618	-7.44727
ENSG00000260483.2	AC015720.2	0.316983	NA	0.390264	0.663932	-1.65752	1.92929	-0.859138
ENSG00000206144.5	MAPK6P1	0.317122	0.261984	0.0959559	3.60687	-1.65689	0.995259	-1.66478
ENSG00000146618.3	FERD3L	0.317125	0.116873	0.0301745	5.6381	-1.65688	0.764316	-2.16779
ENSG00000147036.12	LANCL3	0.317269	1.82687e-07	2.39697e-09	429.729	-1.65622	0.277502	-5.96833
ENSG00000260440.3	LINC01544	0.31742	NA	0.509913	1.21097	-1.65553	2.51229	-0.658973
ENSG00000250260.1	AC113382.2	0.317753	NA	0.595108	0.323709	-1.65402	3.11229	-0.531448
ENSG00000236403.2	AL353611.1	0.317753	NA	0.595108	0.323709	-1.65402	3.11229	-0.531448
ENSG00000253778.1	AC090572.2	0.317753	NA	0.595108	0.323709	-1.65402	3.11229	-0.531448
ENSG00000260426.1	AC008060.4	0.317854	NA	0.293356	1.81065	-1.65356	1.57364	-1.05079
ENSG00000205584.6	AC211476.3	0.317894	NA	0.299174	1.33783	-1.65338	1.59254	-1.03821
ENSG00000285292.1	ABCF2	0.317997	0.621409	0.375363	5.66676	-1.65291	1.8646	-0.886473
ENSG00000222614.1	AC008635.1	0.318011	NA	0.433527	0.624235	-1.65285	2.11046	-0.783171
ENSG00000181355.21	OFCC1	0.318802	NA	0.491445	1.28505	-1.64927	2.39715	-0.688012
ENSG00000127329.15	PTPRB	0.318856	9.74572e-06	2.66571e-07	1887.35	-1.64902	0.320468	-5.14567
ENSG00000272434.1	AC137630.3	0.318939	NA	0.384232	2.08776	-1.64865	1.89473	-0.870125
ENSG00000228784.9	LINC00954	0.31897	3.66065e-07	5.39353e-09	95.259	-1.64851	0.282542	-5.83455
ENSG00000139915.21	MDGA2	0.319013	1.88793e-06	3.71562e-08	537.321	-1.64831	0.299483	-5.50386
ENSG00000259710.1	NUTF2P6	0.319106	NA	0.422182	0.987794	-1.64789	2.05309	-0.802641
ENSG00000169306.10	IL1RAPL1	0.319209	2.4889e-06	5.17498e-08	93.7854	-1.64743	0.302547	-5.44519
ENSG00000185149.6	NPY2R	0.319248	8.97451e-05	3.73844e-06	192.04	-1.64725	0.35613	-4.62542
ENSG00000272164.1	AC005972.2	0.319435	NA	0.596841	0.361138	-1.64641	3.1126	-0.528948
ENSG00000235737.1	TRIM60P19	0.319435	NA	0.596841	0.361138	-1.64641	3.1126	-0.528948
ENSG00000230237.1	GNA13P1	0.319435	NA	0.596841	0.361138	-1.64641	3.1126	-0.528948
ENSG00000222378.1	RNA5SP44	0.319435	NA	0.596841	0.361138	-1.64641	3.1126	-0.528948
ENSG00000244244.2	RPS3AP42	0.319435	NA	0.596841	0.361138	-1.64641	3.1126	-0.528948
ENSG00000260542.1	AL499627.1	0.319435	NA	0.596841	0.361138	-1.64641	3.1126	-0.528948
ENSG00000252892.1	RNU6-548P	0.319528	0.287426	0.110426	3.3382	-1.64598	1.03114	-1.59628
ENSG00000157873.17	TNFRSF14	0.319645	0.0364642	0.00642225	24.8296	-1.64546	0.603747	-2.72541
ENSG00000123307.4	NEUROD4	0.319931	1.72108e-05	5.21351e-07	230.093	-1.64417	0.327635	-5.01828
ENSG00000145284.12	SCD5	0.319954	3.69426e-11	1.2184e-13	6699.96	-1.64406	0.221728	-7.41477
ENSG00000260417.1	AC092127.1	0.320087	0.210779	0.0698568	4.26141	-1.64346	0.906569	-1.81284
ENSG00000101842.13	VSIG1	0.320277	0.0885861	0.020909	10.4875	-1.64261	0.711201	-2.30962
ENSG00000225282.1	AP000350.2	0.320306	NA	0.597736	0.337344	-1.64248	3.11277	-0.527658
ENSG00000286289.1	AL133482.1	0.320306	NA	0.597736	0.337344	-1.64248	3.11277	-0.527658
ENSG00000214009.2	PCNAP3	0.320306	NA	0.597736	0.337344	-1.64248	3.11277	-0.527658
ENSG00000224661.1	AC010907.1	0.320306	NA	0.597736	0.337344	-1.64248	3.11277	-0.527658
ENSG00000255109.6	LINC02740	0.320306	NA	0.597736	0.337344	-1.64248	3.11277	-0.527658
ENSG00000225328.2	LINC01594	0.320306	NA	0.597736	0.337344	-1.64248	3.11277	-0.527658
ENSG00000287845.1	AC093765.5	0.320306	NA	0.597736	0.337344	-1.64248	3.11277	-0.527658
ENSG00000287510.1	AL137857.1	0.320306	NA	0.597736	0.337344	-1.64248	3.11277	-0.527658
ENSG00000276563.1	AL359075.1	0.320306	NA	0.597736	0.337344	-1.64248	3.11277	-0.527658
ENSG00000251635.2	LINC02278	0.320306	NA	0.597736	0.337344	-1.64248	3.11277	-0.527658
ENSG00000231562.1	AL512593.1	0.320424	NA	0.319539	1.36095	-1.64195	1.64952	-0.995406
ENSG00000276832.2	AL354718.3	0.32049	0.0354956	0.00620965	9.13701	-1.64165	0.599908	-2.7365
ENSG00000279908.1	AC026748.1	0.320506	NA	0.0896124	3.08318	-1.64158	0.967087	-1.69745
ENSG00000236986.6	AL157938.2	0.320597	NA	0.452559	1.11191	-1.64117	2.18485	-0.751156
ENSG00000268658.5	LINC00664	0.320764	0.107294	0.0269744	21.0685	-1.64042	0.741636	-2.21189
ENSG00000267136.1	AP005131.1	0.320775	NA	0.31448	1.59747	-1.64037	1.6308	-1.00587
ENSG00000229324.1	NUTF2P7	0.321213	NA	0.598667	0.341889	-1.6384	3.11293	-0.526319
ENSG00000278885.1	AC106730.2	0.321213	NA	0.598667	0.341889	-1.6384	3.11293	-0.526319
ENSG00000204699.4	UBTFL3	0.321436	NA	0.574785	0.344041	-1.6374	2.91861	-0.561019
ENSG00000213307.4	RPL18P11	0.321436	NA	0.574785	0.344041	-1.6374	2.91861	-0.561019
ENSG00000204705.3	UBTFL5	0.321436	NA	0.574785	0.344041	-1.6374	2.91861	-0.561019
ENSG00000138653.10	NDST4	0.321452	0.00537103	0.000557609	168.668	-1.63733	0.47439	-3.45144
ENSG00000238062.6	SPATA3-AS1	0.321553	NA	0.288091	2.04848	-1.63687	1.54085	-1.06232
ENSG00000156284.6	CLDN8	0.321637	0.33246	0.137906	19.8257	-1.63649	1.10303	-1.48363
ENSG00000147647.13	DPYS	0.321643	0.0012839	9.58265e-05	103.942	-1.63647	0.419508	-3.90092
ENSG00000276842.1	AC023510.2	0.322149	0.0702254	0.0153365	11.9578	-1.6342	0.674083	-2.42433
ENSG00000258990.2	MPPE1P1	0.322214	NA	0.551933	0.646146	-1.63391	2.74668	-0.594867
ENSG00000229146.2	SNX18P4	0.322561	0.179975	0.0555055	3.81189	-1.63236	0.852452	-1.9149
ENSG00000272921.1	AC005832.4	0.322721	NA	0.528156	0.970679	-1.63164	2.58653	-0.630824
ENSG00000287672.1	AC003086.1	0.322725	0.151943	0.0435826	13.4536	-1.63162	0.808501	-2.01808
ENSG00000231367.6	LINC02613	0.322913	NA	0.600403	0.346193	-1.63078	3.11325	-0.523821
ENSG00000254867.1	AP006287.1	0.322913	NA	0.600403	0.346193	-1.63078	3.11325	-0.523821
ENSG00000146839.19	ZAN	0.322913	NA	0.600403	0.346193	-1.63078	3.11325	-0.523821
ENSG00000236527.1	ARF4P2	0.322913	NA	0.600403	0.346193	-1.63078	3.11325	-0.523821
ENSG00000287820.1	AL050338.2	0.322913	NA	0.600403	0.346193	-1.63078	3.11325	-0.523821
ENSG00000263189.1	AC023934.1	0.323016	NA	0.600509	0.348586	-1.63032	3.11327	-0.523668
ENSG00000282419.3	TEX13D	0.323126	NA	0.421277	1.35037	-1.62983	2.02663	-0.804209
ENSG00000257258.2	AC012150.1	0.323324	NA	0.389907	2.06451	-1.62895	1.8946	-0.859786
ENSG00000180219.2	FAM71C	0.323344	NA	0.426627	0.986243	-1.62886	2.04894	-0.794977
ENSG00000227496.3	AC099066.2	0.323375	NA	0.250841	1.44632	-1.62872	1.41836	-1.14831
ENSG00000249937.8	LINC02223	0.323489	0.025335	0.00403426	61.8176	-1.62821	0.566242	-2.87547
ENSG00000227770.1	RPL7P12	0.323534	NA	0.0900173	2.62145	-1.62801	0.960305	-1.69531
ENSG00000179133.15	C10orf67	0.323565	0.208677	0.068817	13.2678	-1.62787	0.894623	-1.81962
ENSG00000224318.6	CHL1-AS2	0.3236	NA	0.274577	3.11792	-1.62772	1.48979	-1.09258
ENSG00000248192.1	ATG10-AS1	0.323606	NA	0.552834	0.688253	-1.62769	2.74244	-0.593519
ENSG00000226496.3	LINC00323	0.323808	0.202652	0.065856	5.9903	-1.62679	0.884413	-1.8394
ENSG00000186191.8	BPIFB4	0.324209	NA	0.501225	1.925	-1.625	2.41613	-0.672563
ENSG00000252618.1	RNA5SP441	0.324217	NA	0.583985	0.350738	-1.62497	2.96758	-0.547574
ENSG00000204625.10	HCG9	0.324229	NA	0.577395	0.369673	-1.62492	2.91625	-0.557194
ENSG00000200366.1	RNU6-511P	0.324315	NA	0.381851	0.630932	-1.62453	1.85769	-0.874491
ENSG00000270207.2	AC077690.1	0.324438	0.0785613	0.0178329	11.8186	-1.62399	0.685496	-2.36907
ENSG00000255050.1	AC067930.4	0.324502	NA	0.536199	0.603776	-1.6237	2.62492	-0.618571
ENSG00000243385.2	AC094085.1	0.324505	NA	0.579109	0.339281	-1.62369	2.92722	-0.554687
ENSG00000238410.1	AC007099.3	0.324674	NA	0.468824	0.719853	-1.62294	2.24041	-0.724393
ENSG00000286951.1	AL356113.1	0.324986	NA	0.413287	1.67735	-1.62155	1.98204	-0.818123
ENSG00000196092.14	PAX5	0.325048	0.000141609	6.503e-06	441.856	-1.62128	0.359538	-4.50934
ENSG00000213014.3	VN2R17P	0.325185	0.188584	0.0592694	5.19968	-1.62067	0.859228	-1.88619
ENSG00000220494.4	YAP1P1	0.325319	NA	0.242027	1.56878	-1.62007	1.38476	-1.16993
ENSG00000250062.5	MAPK10-AS1	0.325378	NA	0.341842	1.34861	-1.61981	1.70411	-0.950531
ENSG00000260183.1	AC108097.1	0.325545	NA	0.60308	0.393153	-1.61907	3.11374	-0.519977
ENSG00000288071.1	AL591135.2	0.325545	NA	0.60308	0.393153	-1.61907	3.11374	-0.519977
ENSG00000233534.3	AL035604.1	0.325545	NA	0.60308	0.393153	-1.61907	3.11374	-0.519977
ENSG00000236797.1	SPA17P1	0.325545	NA	0.60308	0.393153	-1.61907	3.11374	-0.519977
ENSG00000276093.1	AL132822.1	0.325545	NA	0.60308	0.393153	-1.61907	3.11374	-0.519977
ENSG00000279586.1	AP000711.1	0.325545	NA	0.60308	0.393153	-1.61907	3.11374	-0.519977
ENSG00000229455.2	RPS10P18	0.325545	NA	0.60308	0.393153	-1.61907	3.11374	-0.519977
ENSG00000270666.1	AL021918.1	0.325545	NA	0.60308	0.393153	-1.61907	3.11374	-0.519977
ENSG00000240484.1	AC091544.1	0.325545	NA	0.60308	0.393153	-1.61907	3.11374	-0.519977
ENSG00000286344.1	AL357127.2	0.325545	NA	0.60308	0.393153	-1.61907	3.11374	-0.519977
ENSG00000275166.1	MIR6814	0.325545	NA	0.60308	0.393153	-1.61907	3.11374	-0.519977
ENSG00000122432.18	SPATA1	0.325779	0.00242808	0.00020873	17.2695	-1.61804	0.436339	-3.70821
ENSG00000196534.5	OR9K1P	0.325798	NA	0.348891	0.984091	-1.61795	1.72721	-0.936743
ENSG00000270326.1	AL021997.1	0.325834	NA	0.360035	1.01684	-1.61779	1.7675	-0.915298
ENSG00000233842.2	AC079248.1	0.32584	NA	0.603379	0.357435	-1.61776	3.1138	-0.519547
ENSG00000255426.1	AC044839.2	0.32584	NA	0.603379	0.357435	-1.61776	3.1138	-0.519547
ENSG00000270937.1	AL033381.2	0.32584	NA	0.603379	0.357435	-1.61776	3.1138	-0.519547
ENSG00000286857.1	AC007463.2	0.32584	NA	0.603379	0.357435	-1.61776	3.1138	-0.519547
ENSG00000248516.1	AC105415.1	0.32584	NA	0.603379	0.357435	-1.61776	3.1138	-0.519547
ENSG00000216518.1	EEF1GP6	0.32584	NA	0.603379	0.357435	-1.61776	3.1138	-0.519547
ENSG00000266696.1	AC044840.1	0.32584	NA	0.603379	0.357435	-1.61776	3.1138	-0.519547
ENSG00000188293.6	IGFL1	0.32584	NA	0.603379	0.357435	-1.61776	3.1138	-0.519547
ENSG00000263926.1	MIR4462	0.32584	NA	0.603379	0.357435	-1.61776	3.1138	-0.519547
ENSG00000255258.2	LINC02743	0.32584	NA	0.603379	0.357435	-1.61776	3.1138	-0.519547
ENSG00000213171.3	LINGO4	0.32584	NA	0.603379	0.357435	-1.61776	3.1138	-0.519547
ENSG00000260488.1	AC007216.1	0.32584	NA	0.603379	0.357435	-1.61776	3.1138	-0.519547
ENSG00000254486.1	LINC02547	0.32584	NA	0.603379	0.357435	-1.61776	3.1138	-0.519547
ENSG00000253224.1	PGAM5P1	0.32584	NA	0.603379	0.357435	-1.61776	3.1138	-0.519547
ENSG00000225598.1	AL606519.1	0.32584	NA	0.603379	0.357435	-1.61776	3.1138	-0.519547
ENSG00000272874.1	AL034548.1	0.32584	NA	0.603379	0.357435	-1.61776	3.1138	-0.519547
ENSG00000187980.6	PLA2G2C	0.32584	NA	0.603379	0.357435	-1.61776	3.1138	-0.519547
ENSG00000227864.1	ARL5AP1	0.32584	NA	0.603379	0.357435	-1.61776	3.1138	-0.519547
ENSG00000101323.5	HAO1	0.32584	NA	0.603379	0.357435	-1.61776	3.1138	-0.519547
ENSG00000237790.1	LINC01318	0.32584	NA	0.603379	0.357435	-1.61776	3.1138	-0.519547
ENSG00000286474.1	AL355672.1	0.32584	NA	0.603379	0.357435	-1.61776	3.1138	-0.519547
ENSG00000135426.16	TESPA1	0.32584	NA	0.603379	0.357435	-1.61776	3.1138	-0.519547
ENSG00000172208.6	OR4X2	0.32584	NA	0.603379	0.357435	-1.61776	3.1138	-0.519547
ENSG00000235429.1	AC083875.1	0.32584	NA	0.603379	0.357435	-1.61776	3.1138	-0.519547
ENSG00000221937.4	TAS2R40	0.32584	NA	0.603379	0.357435	-1.61776	3.1138	-0.519547
ENSG00000287040.1	AL590560.5	0.32584	NA	0.603379	0.357435	-1.61776	3.1138	-0.519547
ENSG00000236930.1	AC099782.2	0.32584	NA	0.603379	0.357435	-1.61776	3.1138	-0.519547
ENSG00000277590.1	MIR7845	0.32584	NA	0.603379	0.357435	-1.61776	3.1138	-0.519547
ENSG00000258729.2	AL355102.3	0.32584	NA	0.603379	0.357435	-1.61776	3.1138	-0.519547
ENSG00000238015.2	AC104837.2	0.32584	NA	0.603379	0.357435	-1.61776	3.1138	-0.519547
ENSG00000233970.1	AC092159.2	0.32584	NA	0.603379	0.357435	-1.61776	3.1138	-0.519547
ENSG00000258343.2	AC090001.1	0.326244	0.118196	0.0306559	5.14239	-1.61598	0.747614	-2.16151
ENSG00000239392.2	AL354989.2	0.326294	NA	0.29892	1.36701	-1.61575	1.55547	-1.03875
ENSG00000242041.1	RPL35AP28	0.326319	NA	0.438889	0.689676	-1.61565	2.08721	-0.77407
ENSG00000249506.3	ZEB2P1	0.326405	NA	0.15955	2.51566	-1.61526	1.14836	-1.40659
ENSG00000204060.7	FOXO6	0.326498	2.38866e-06	4.91518e-08	209.386	-1.61486	0.296067	-5.45435
ENSG00000251246.1	AL691442.2	0.326563	0.583918	0.335928	8.17133	-1.61457	1.67792	-0.962242
ENSG00000224806.2	ARL5AP4	0.326796	NA	0.450404	0.641601	-1.61354	2.13787	-0.754741
ENSG00000257283.1	AC012464.1	0.326893	NA	0.415288	1.32354	-1.61311	1.98019	-0.814624
ENSG00000228959.1	AL049812.3	0.327298	NA	0.348825	1.13827	-1.61132	1.7199	-0.936871
ENSG00000152977.10	ZIC1	0.327421	0.000632751	3.9469e-05	3207.87	-1.61078	0.391864	-4.11057
ENSG00000214641.3	AL445529.1	0.327473	NA	0.375763	0.706739	-1.61055	1.81833	-0.885729
ENSG00000265091.5	AP001496.2	0.327474	NA	0.286984	2.48045	-1.61055	1.51259	-1.06476
ENSG00000229352.1	AC007563.1	0.327499	NA	0.39725	1.56218	-1.61044	1.90237	-0.846543
ENSG00000252965.1	AC016959.1	0.327728	NA	0.29005	1.09733	-1.60943	1.52119	-1.05801
ENSG00000182132.13	KCNIP1	0.327851	9.11661e-07	1.56546e-08	289.405	-1.60889	0.284545	-5.65423
ENSG00000223488.2	MAPK6P2	0.327866	NA	0.479834	0.706773	-1.60882	2.27695	-0.70657
ENSG00000156194.18	PPEF2	0.32791	0.538269	0.293477	3.66801	-1.60863	1.53126	-1.05053
ENSG00000249600.1	AC106806.2	0.328053	NA	0.605615	0.397698	-1.608	3.11421	-0.516343
ENSG00000165084.16	C8orf34	0.328139	3.2219e-08	3.31488e-10	108.376	-1.60762	0.255856	-6.28329
ENSG00000151623.15	NR3C2	0.328637	1.09506e-05	3.05415e-07	1007.49	-1.60543	0.313557	-5.12007
ENSG00000231645.3	KRT17P6	0.328922	NA	0.195901	2.51632	-1.60418	1.24036	-1.29332
ENSG00000287369.1	AC111197.1	0.328927	NA	0.323994	1.48471	-1.60416	1.62647	-0.986284
ENSG00000286281.1	AL353152.2	0.329096	NA	0.214583	2.79094	-1.60342	1.29198	-1.24106
ENSG00000222413.1	RN7SKP125	0.329174	NA	0.606743	0.352675	-1.60308	3.11441	-0.514728
ENSG00000268361.1	L34079.1	0.329175	NA	0.507152	0.345978	-1.60307	2.41689	-0.663279
ENSG00000246022.3	ALDH1L1-AS2	0.329227	NA	0.394486	2.40331	-1.60284	1.88235	-0.85151
ENSG00000219902.1	RPL35P3	0.329288	NA	0.606857	0.336673	-1.60258	3.11444	-0.514564
ENSG00000255422.3	AP002954.1	0.329288	NA	0.606857	0.336673	-1.60258	3.11444	-0.514564
ENSG00000274723.1	AC079906.1	0.329386	NA	0.39524	1.59741	-1.60215	1.88454	-0.850153
ENSG00000276863.1	AC124319.2	0.329631	0.188419	0.0591769	4.75577	-1.60107	0.848532	-1.88688
ENSG00000234377.7	OBI1-AS1	0.330103	0.0278253	0.00456856	27.7009	-1.59901	0.563831	-2.83598
ENSG00000226207.1	AL080316.1	0.330182	NA	0.512441	1.2628	-1.59867	2.44056	-0.655042
ENSG00000285536.1	LINC02838	0.330185	NA	0.496783	1.58331	-1.59865	2.35249	-0.679559
ENSG00000279482.1	AC007683.2	0.330216	NA	0.295622	1.15065	-1.59852	1.52841	-1.04587
ENSG00000124507.11	PACSIN1	0.330269	5.92014e-07	9.31688e-09	358.987	-1.59829	0.278315	-5.74272
ENSG00000278147.1	AL121809.3	0.330298	NA	0.525992	0.974484	-1.59816	2.52022	-0.634136
ENSG00000276756.4	AC245595.1	0.330353	0.424761	0.200906	4.91546	-1.59792	1.24937	-1.27897
ENSG00000273595.1	AC092106.1	0.330605	NA	0.592561	0.341218	-1.59682	2.98399	-0.535129
ENSG00000266160.2	RN7SL612P	0.330605	NA	0.592561	0.341218	-1.59682	2.98399	-0.535129
ENSG00000184945.14	AQP12A	0.330693	NA	0.44458	0.680156	-1.59643	2.08826	-0.764482
ENSG00000018236.15	CNTN1	0.330795	3.61929e-11	1.16772e-13	3868.21	-1.59599	0.215081	-7.42039
ENSG00000244540.2	AC087884.2	0.33083	NA	0.386583	0.98559	-1.59584	1.84313	-0.865831
ENSG00000231170.7	AC002451.1	0.33087	0.0100703	0.00122829	30.3031	-1.59566	0.493672	-3.23223
ENSG00000279511.1	AL356274.2	0.330991	NA	0.408098	1.251	-1.59514	1.92825	-0.827245
ENSG00000260455.2	NBAT1	0.331135	0.000146366	6.77334e-06	125.418	-1.59451	0.354281	-4.50069
ENSG00000271086.7	NAMA	0.331179	0.0811105	0.0185977	5.70566	-1.59432	0.677424	-2.3535
ENSG00000201600.1	RN7SKP124	0.331406	NA	0.266191	1.32912	-1.59333	1.43301	-1.11188
ENSG00000170476.16	MZB1	0.331564	NA	0.411228	1.65151	-1.59264	1.93815	-0.821735
ENSG00000224079.1	AC091729.1	0.331652	NA	0.275351	1.77679	-1.59226	1.45969	-1.09082
ENSG00000232646.1	AL731563.2	0.331688	NA	0.430192	1.30256	-1.5921	2.01822	-0.788863
ENSG00000243508.1	AC108688.1	0.331735	NA	0.424586	1.13802	-1.5919	1.99363	-0.79849
ENSG00000250486.4	FAM218A	0.331885	6.82851e-09	5.8016e-11	120.756	-1.59124	0.242984	-6.54876
ENSG00000224223.1	VSTM2A-OT1	0.331965	0.0699812	0.0152703	9.0689	-1.5909	0.655796	-2.4259
ENSG00000285518.1	AC004900.1	0.332147	NA	0.539005	0.954435	-1.59011	2.58841	-0.614318
ENSG00000242435.1	UPK3BP1	0.332259	NA	0.376773	0.673739	-1.58962	1.7985	-0.883858
ENSG00000151322.19	NPAS3	0.332338	0.00012885	5.80158e-06	877.875	-1.58928	0.350564	-4.53349
ENSG00000239021.1	RNA5SP246	0.332389	NA	0.376683	1.14902	-1.58905	1.79752	-0.884024
ENSG00000237186.1	AC092418.2	0.332399	NA	0.201333	1.59246	-1.58901	1.24359	-1.27776
ENSG00000235425.2	RPS7P13	0.332532	NA	0.517926	0.374218	-1.58843	2.4568	-0.646546
ENSG00000218772.2	FAM8A6P	0.332572	NA	0.610144	0.347915	-1.58826	3.11505	-0.509868
ENSG00000236440.1	COPRSP1	0.332572	NA	0.610144	0.347915	-1.58826	3.11505	-0.509868
ENSG00000260082.1	AC106886.1	0.33258	0.438209	0.210551	3.62053	-1.58823	1.2685	-1.25205
ENSG00000230323.6	LINC00159	0.332621	NA	0.610193	0.305725	-1.58805	3.11505	-0.509799
ENSG00000126952.17	NXF5	0.332621	NA	0.610193	0.305725	-1.58805	3.11505	-0.509799
ENSG00000267394.1	AC004596.1	0.332621	NA	0.610193	0.305725	-1.58805	3.11505	-0.509799
ENSG00000235586.1	AC011247.1	0.332621	NA	0.610193	0.305725	-1.58805	3.11505	-0.509799
ENSG00000258422.5	AL160191.1	0.332621	NA	0.610193	0.305725	-1.58805	3.11505	-0.509799
ENSG00000251388.1	AC079380.1	0.332621	NA	0.610193	0.305725	-1.58805	3.11505	-0.509799
ENSG00000168582.5	CRYGA	0.332621	NA	0.610193	0.305725	-1.58805	3.11505	-0.509799
ENSG00000167757.14	KLK11	0.332888	0.139384	0.0386847	16.6118	-1.58689	0.767532	-2.06752
ENSG00000227395.1	EIF2AP4	0.333043	NA	0.352162	1.58657	-1.58622	1.70487	-0.930404
ENSG00000155659.15	VSIG4	0.333149	NA	0.394652	2.36612	-1.58576	1.86294	-0.851212
ENSG00000148935.11	GAS2	0.333256	0.000109245	4.7387e-06	468.582	-1.5853	0.346435	-4.57604
[truncated: 58,670 more rows]
